# Supplementary material for: VIB1, a Link between Glucose Signaling and Carbon Catabolite Repression, Is Essential for Plant Cell Wall Degradation by Neurospora crassa
Source: PLoS Genet. 2014 Aug 21;10(8):e1004500. doi: 10.1371/journal.pgen.1004500 (PMC4140635; doi:10.1371/journal.pgen.1004500)
Supplement: Table S2 — Gene list of the 770 genes differentially expressed between no carbon and Avicel conditions in Δvib-1. (XLSX) [file pgen.1004500.s007.xlsx]

## Sheet: 770 genes
Gene	Annotation	Mean (∆vib-1 on No Carbon)	Mean (∆vib-1 on Avicel)	log2(foldchange)	P adjust	∆vib-1_no carbon_replicate 1	∆vib-1_no carbon_replicate 2	∆vib-1_no carbon_replicate 3	∆vib-1_Avicel_replicate 1	∆vib-1_Avicel_replicate 2	∆vib-1_Avicel_replicate 3
NCU08457	rodlet protein	43474.9	12888.7	-1.75408	0.00337696	73479.7	63292.3	64828.8	25111.9	10464.9	9510.56
NCU08189	endo-1,4-beta-xylanase	29.1832	9175.98	8.29658	0	41.1464	21.2383	32.0509	8757.69	6703.44	7566.29
NCU04276	hypothetical protein	787.067	7553.25	3.26254	2.8e-10	960.88	928.555	1360.98	5183.34	9983.4	11817.5
NCU08114	cdt-2	39.7277	6914.4	7.44332	0	72.4978	42.8401	44.9155	10090.1	5909.27	7095.54
NCU07225	endo-1,4-beta-xylanase 2	14.6707	5122.26	8.4477	0	15.878	3.92601	33.6625	5749.33	3561.2	4320.39
NCU01754	alcohol dehydrogenase I, variant	1005.05	5073.98	2.33584	0.000124984	1173.08	1230.21	1290.9	2355.64	5618.42	6323.45
NCU01754	alcohol dehydrogenase I, variant	1005.05	5073.98	2.33584	0.000124984	1173.08	1230.21	1290.9	2355.64	5618.42	6323.45
NCU08384	xylose reductase	11.4601	4393.78	8.58269	0	16.0881	7.25894	23.6801	7459.89	2971.97	3698.98
NCU04502	hypothetical protein	924.403	3652.57	1.98232	6.02e-05	994.168	894	1066.59	2820.75	3710.65	3898.68
NCU10051	flavohemoglobin	372.998	3409.52	3.19233	1.04e-08	353.461	329.309	369.423	1128.77	2839.41	3699.89
NCU05853	cdt-3	276.491	2760.55	3.31965	1.87e-11	474.662	348.972	332.727	4934.82	2288.73	2096.96
NCU07853	uricase	325.834	2274.53	2.80336	1.97e-10	450.59	346.215	500.891	1731.47	2504.93	2652.6
NCU07340	cellobiohydrolase CBHI	23.556	2199.92	6.54521	0	29.4964	21.8292	43.9075	3351.57	1697.72	1914.59
NCU01871	hypothetical protein	227.498	2148.52	3.23942	7.07e-12	241.918	226.358	277.861	1275.17	2230.41	2528.67
NCU01900	xylosidase/arabinosidase	17.0403	2079.11	6.93087	0	17.8164	17.1547	21.2361	2693.91	1260.11	1641.32
NCU06524	protease inhibitor	313.593	1988.08	2.66441	3.25e-09	318.06	296.285	249.679	964.928	1796.74	2321.79
NCU00130	beta-glucosidase	10.3242	1706.01	7.36846	0	15.4288	10.4685	11.6147	2845.92	712.291	1480.29
NCU00891	xylitol dehydrogenase	38.1123	1690.73	5.47125	0	51.2959	48.5589	52.8882	2622.89	1181.4	1338.99
NCU04249	hypothetical protein	617.765	1664.54	1.42999	0.0046437	806.604	678.983	761.196	1377.57	1837.43	1948.17
NCU00801	cdt-1	26.1127	1494.04	5.83832	0	45.0696	32.407	39.3196	1945	1443.73	1885.43
NCU05338	hypothetical protein	202.644	1474.44	2.86315	0	229.117	225.023	277.476	823.061	1629.17	1873.54
NCU05897	l-fucose permease	202.354	1428.56	2.81961	1.79e-09	264.056	235.416	227.981	662.329	1686.51	1940.55
NCU11843	hypothetical protein	119.925	1386.68	3.53142	0	101.906	112.489	139.704	397.941	1521.04	2101.07
NCU09873	phosphoenolpyruvate carboxykinase	185.581	1354.32	2.86746	2.93e-09	355.869	173.94	226.236	633.546	1749.13	2071.27
NCU08755	beta-glucosidase 1	87.2917	1288.19	3.88335	0	101.385	97.3011	102.009	1511.44	943.603	1208.26
NCU02193	pyruvate decarboxylase, variant	111.729	1248.84	3.48252	1.03e-10	120.12	138.86	161.06	237.762	1422.75	1796.48
NCU02193	pyruvate decarboxylase, variant	111.729	1248.84	3.48252	1.03e-10	120.12	138.86	161.06	237.762	1422.75	1796.48
NCU10021	MFS monosaccharide transporter	429.214	1211.91	1.49751	0.00123831	569.864	616.444	588.484	1487.35	1509.96	1115.13
NCU11338	hypothetical protein	276.273	1192.95	2.11036	3.66e-07	352.251	316.928	403.715	805.071	1467.16	1626.83
NCU02343	alpha-L-arabinofuranosidase 2	45.1036	1185.21	4.71576	0	54.5421	48.235	49.4586	1272.41	1041.58	1078.59
NCU06043	GPR/FUN34 family protein	372.824	1130.84	1.60083	0.00205244	551.846	510.518	523.87	2406.77	702.882	653.003
NCU09235	conidiation-specific protein-8	2813.14	1046.41	-1.42673	0.000596454	2991.73	3074.14	2545.87	771.658	1101.72	1096.08
NCU04856	glutamine synthetase, variant	337.489	1024.01	1.60132	0.000258266	425.459	355.892	393.295	764.456	968.575	1016.86
NCU04856	glutamine synthetase, variant	337.489	1024.01	1.60132	0.000258266	425.459	355.892	393.295	764.456	968.575	1016.86
NCU02623	mitochondrial hypoxia responsive	95.898	994.226	3.374	0	103.061	99.6279	135.543	510.703	1072.46	1317.98
NCU08412	endo-beta-1,4-mannanase	13.667	987.127	6.17447	0	20.5521	8.86217	9.05014	547.196	799.465	936.726
NCU02097	short chain dehydrogenase	396.635	985.249	1.31268	0.00392541	413.392	432.537	441.725	846.325	844.944	960.799
NCU00762	endoglucanase 3	4.2547	973.637	7.83818	0	5.10896	2.17694	10.833	1355.04	826.113	960.797
NCU01538	hypothetical protein	144.106	963.068	2.7405	9.19e-10	137.335	132.669	147.674	320.862	710.975	991.657
NCU09705	GAL10	54.3999	958.883	4.13968	0	67.1435	70.3115	56.2122	936.939	827.731	914.61
NCU04910	hypothetical protein	327.056	955.228	1.54631	0.000164939	346.617	312.699	311.426	636.457	893.108	926.194
NCU04265	invertase	89.7632	910.11	3.34184	4.5e-14	115.244	111.413	132.587	460.543	889.816	1249.75
NCU09680	cellobiohydrolase CBHII	19.5773	903.827	5.52879	0	29.6576	27.4101	41.8845	1790.83	616.709	797.516
NCU01050	polysaccharide monooxygenase-2	1.32656	903.329	9.41142	0	2.54375	0.269464	2.09773	1037.14	611.329	798.421
NCU05133	udp-glucose 4-epimerase	101.999	901.037	3.14304	0	110.985	125.205	126.668	612.457	915.829	1016.89
NCU01487	hypothetical protein	322.576	872.086	1.43483	0.00156529	428.884	355.938	412.708	798.013	860.628	869.739
NCU05068	hypothetical protein	12.41	829.463	6.0626	0	17.4488	14.853	12.5611	830.793	809.536	888.799
NCU07352	hypothetical protein	52.2323	784.112	3.90805	0	52.6567	57.5826	74.0105	174.121	878.666	1215.07
NCU04401	fructose-bisphosphate aldolase	12.1636	771.453	5.98694	0	10.4079	12.4175	12.2655	625.274	490.269	690.082
NCU03013	anchored cell wall protein 10	267.414	665.381	1.31511	0.000370384	325.068	303.698	351.806	561.525	669.198	704.014
NCU08137	hypothetical protein	89.9569	650.907	2.85515	0	125.413	119.595	149.962	688.918	770.944	896.015
NCU00292	cholinesterase	9.75813	644.102	6.04454	0	10.6254	11.741	10.0713	742.145	517.13	544.867
NCU07143	6-phosphogluconolactonase	22.2092	642.311	4.85404	0	31.1705	24.0763	32.7998	858.124	454.212	644.842
NCU06143	hypothetical protein	16.5954	641.903	5.27349	0	20.8177	20.505	19.4178	562.051	587.274	626.932
NCU07190	exoglucanase 3	22.5562	617.625	4.77513	0	29.1885	26.6335	25.9829	1122.32	254.78	406.862
NCU09689	hypothetical protein	17.6249	617.323	5.13034	0	23.5547	20.9823	21.3329	803.295	448.066	579.897
NCU10107	ribose 5-phosphate isomerase	21.4388	604.017	4.81629	0	21.4506	26.8556	29.4849	778.223	420.057	508.649
NCU05864	hypothetical protein	11.4038	575.485	5.65719	0	14.3682	8.72879	8.43729	677.257	299.487	440.905
NCU06138	quinate permease	9.00593	573.97	5.99396	0	11.546	9.3351	11.389	867.169	423.618	454.621
NCU05667	anchored cell wall protein 3	260.287	569.019	1.12837	0.00308741	385.197	353.222	366.917	485.083	686.42	806.459
NCU08229	hypothetical protein	231.459	517.89	1.16189	0.00773016	229.436	294.441	257.61	335.174	469.173	565.704
NCU08621	hypothetical protein	147.485	510.843	1.79231	1.56e-07	137.518	164.918	158.473	363.643	467.619	542.565
NCU06490	hypothetical protein	83.7995	505.521	2.59276	1.55e-14	102.309	93.4587	81.4396	710.775	324.562	369.027
NCU09174	hypothetical protein	53.8938	496.636	3.204	1.55e-14	37.5051	49.9344	49.6918	68.3592	372.499	528.095
NCU04605	hypothetical protein	995.66	491.535	-1.01836	0.00987981	1126.13	1084.05	1312.79	772.849	360.969	309.537
NCU07257	F-box domain-containing protein	39.4633	487.056	3.6255	0	38.6292	45.8078	57.6662	139.32	581.62	717.4
NCU02099	hypothetical protein	75.9044	481.837	2.66629	3.02e-14	86.5966	89.5792	86.831	230.694	470.085	589.683
NCU02773	hypothetical protein	151.564	477.071	1.65428	2.94e-07	166.872	183.842	169.956	303.516	474.867	570.943
NCU05846	hypothetical protein	23.1178	473.99	4.35778	0	28.5203	25.8861	24.4773	381.385	336.714	502.185
NCU05134	hypothetical protein	35.3441	468.958	3.72992	0	31.9365	43.8883	47.0783	343.357	440.581	511.44
NCU09652	beta-xylosidase	59.1194	467.45	2.98311	0	51.8143	59.5876	51.357	476.67	347.965	340.002
NCU09355	hypothetical protein	131.385	455.49	1.79362	2.53e-09	107.993	144.129	148.668	351.943	360.329	404.966
NCU04720	nitrite reductase	70.8902	446.294	2.65434	1.93e-08	55.5636	76.0991	65.9674	97.5409	380.695	541.481
NCU10732	mitochondrial dicarboxylate transporter	156.533	444.397	1.50538	4.55e-05	221.459	167.662	184.209	430.957	416.952	436.724
NCU08760	lytic polysaccharide monooxygenase	7.61988	444.112	5.86501	0	5.60158	4.15343	21.2442	706.302	261.169	330.362
NCU01504	calcineurin binding protein	98.9045	442.86	2.16274	4.94e-11	101.341	152.699	165.534	404.309	451.57	560.005
NCU07363	hypothetical protein	965.532	437.029	-1.14359	0.00562372	1240.07	1158.39	1129.94	557.16	463.912	379.822
NCU02009	FreB	100.82	419.296	2.05619	7.42e-09	125.023	116.28	117.329	362.629	384.638	454.731
NCU07953	alternative oxidase	22.1863	419.223	4.23998	0	20.5042	22.9336	27.1505	129.329	408.99	508.766
NCU05755	hypothetical protein	141.38	415.426	1.55501	1.84e-07	115.156	179.122	221.556	275.315	451.965	450.219
NCU09425	NdvB protein	104.175	414.914	1.9938	1.28e-07	117.708	124.052	130.541	524.554	329.175	370.336
NCU02916	lytic polysaccharide monooxygenase	4.61644	410.232	6.47352	0	7.54948	5.91737	7.46502	709.422	245.607	352.992
NCU00870	hypothetical protein	17.0774	406.018	4.57139	0	18.2309	16.8398	17.7295	541.18	242.051	302.031
NCU07491	hypothetical protein	84.8054	398.698	2.23307	9.61e-11	86.5487	117.898	109.503	249.674	377.868	527.764
NCU09108	hypothetical protein	70.6995	393.991	2.47839	4.89e-12	73.0175	75.5272	81.6338	217.635	396.284	478.598
NCU05881	DUF500 and UBA/TS-N domain-containing protein	100.975	391.304	1.9543	5.93e-07	120.169	133.634	128.338	257.195	380.511	490.565
NCU01320	glutathione S-transferase, variant	29.218	387.097	3.72776	0	26.6921	40.4125	38.1652	604.293	250.88	300.947
NCU01320	glutathione S-transferase, variant	29.218	387.097	3.72776	0	26.6921	40.4125	38.1652	604.293	250.88	300.947
NCU01195	Glu/Leu/Phe/Val dehydrogenase	134.432	386.052	1.52192	1.6e-05	198.48	158.18	180.073	311.109	432.61	428.589
NCU07277	anchored cell wall protein 8	83.5333	374.705	2.16533	3.5e-09	115.291	134.888	134.84	327.86	488.743	574.129
NCU09602	heat shock protein 70	61.4119	369.922	2.59063	3.85e-12	78.4392	83.7096	88.2701	213.097	388.074	550.343
NCU04963	high-affinity glucose transporter	103.396	359.782	1.79894	8.24e-08	122.706	126.465	137.615	377.991	448.93	340.396
NCU00585	phytoene synthase	836.941	359.04	-1.22098	0.00131281	1181.73	1095.06	952.336	338.675	407.956	396.194
NCU06724	glutamine synthetase	173.985	357.346	1.03836	0.00332237	190.773	230.344	247.233	374.32	331.117	348.095
NCU08044	oxidoreductase	66.2762	356.375	2.42683	2.57e-09	93.7204	67.1816	70.148	535.308	276.717	248.88
NCU04400	hypothetical protein	11.1263	355.542	4.99797	0	9.26584	11.2187	14.0128	339.487	252.91	309.7
NCU06651	AN1-type zinc finger protein	120.108	346.281	1.52762	1.76e-06	165.194	140.908	146.876	362.431	322.498	390.855
NCU11353	D-xylulose kinase	25.5408	343.29	3.74855	0	25.934	28.9128	24.0326	421.301	227.007	268.866
NCU06815	hypothetical protein	7.34739	331.897	5.49736	0	8.36635	7.90231	10.7199	139.032	333.063	489.334
NCU04635	hypothetical protein	149.162	331.298	1.15125	0.000137063	187.416	177.2	196.637	459.482	255.774	242.793
NCU08280	squalene epoxidase	55.1682	330.181	2.58135	6.04e-13	58.1738	61.6385	66.1258	128.606	322.661	394.062
NCU01924	hypothetical protein	67.3742	329.2	2.28869	2.26e-11	78.2254	80.6009	80.1475	237.346	310.391	367.407
NCU01428	hydroxyisourate hydrolase	123.453	328.736	1.41297	1.85e-06	99.7928	106.39	92.3712	215.454	257.146	304.946
NCU06940	hypothetical protein	25.5363	328.421	3.68492	0	23.9634	30.9282	33.0257	136.05	392.591	391.956
NCU10028	bax Inhibitor family protein	134.11	326.711	1.2846	0.000137794	215.654	183.782	233.233	449.366	343.715	359.139
NCU08411	aspartate aminotransferase, variant	60.2333	326.399	2.438	1.72e-10	82.5545	82.3538	85.7323	286.24	323.845	407.041
NCU08411	aspartate aminotransferase, variant	60.2333	326.399	2.438	1.72e-10	82.5545	82.3538	85.7323	286.24	323.845	407.041
NCU04870	acetyl xylan esterase	1.83946	312.648	7.40911	0	2.48626	0.779022	3.86456	386.718	245.031	294.241
NCU01704	NADP:D-xylose dehydrogenase	120.866	305.514	1.33783	0.000152872	122.461	135.18	120.763	269.56	234.319	268.091
NCU02668	cell wall synthesis protein-Penicillium	140.412	295.574	1.07385	0.00513908	175.486	179.953	185.185	216.052	337.37	370.549
NCU07318	mannitol-1-phosphate 5-dehydrogenase	145.525	292.69	1.0081	0.00984534	170.39	164.021	181.619	158.938	326.075	334.085
NCU00248	hypothetical protein	32.1914	289.394	3.16829	0	27.0809	37.3892	37.1218	215.582	213.316	299.854
NCU01546	coproporphyrinogen III oxidase	43.6455	288.226	2.7233	0	45.2426	50.3804	52.7106	114.111	289.879	334.824
NCU03333	tyrosine phosphatase	70.7256	288.196	2.02675	5.37e-08	83.5435	78.7826	81.4907	149.354	329.546	361.473
NCU01640	C2H2 transcription factor	52.6561	279.063	2.40592	3.25e-12	70.3394	72.4009	66.7143	151.58	303.429	405.337
NCU06402	C-4 methylsterol oxidase, variant	96.7554	278.992	1.52781	2.1e-06	107.05	119.248	120.492	193.732	326.367	349.52
NCU06402	C-4 methylsterol oxidase, variant	96.7554	278.992	1.52781	2.1e-06	107.05	119.248	120.492	193.732	326.367	349.52
NCU07082	aspartyl-tRNA synthetase	39.7444	276.763	2.79983	1.88e-11	51.6652	45.3856	51.14	61.2462	275.241	453.859
NCU05057	endoglucanase EG-1	4.78453	274.164	5.84051	0	5.43169	4.541	5.71526	419.036	133.688	216.438
NCU07788	fungal specific transcription factor	78.1311	272.922	1.80452	7.71e-07	96.8114	93.875	90.4018	165.65	302.928	362.781
NCU01845	phosphoglycerate mutase family domain-containing	55.9774	272.883	2.28537	1.87e-11	57.5668	57.4257	76.0504	165.346	275.989	317.102
NCU04266	hypothetical protein	88.2382	271.327	1.62056	3.61e-08	111.841	100.807	103.909	394.289	220.421	228.683
NCU02549	ubiquinol-cytochrome-c reductase subunit beta	107.104	262.731	1.29457	3.97e-05	162.726	140.199	151.236	299.364	275.795	274.66
NCU03322	GDSL family lipase	13.6473	250.652	4.19901	0	16.5008	19.5934	18.5396	265.231	209.299	265.214
NCU08752	acetylcholinesterase	28.082	249.782	3.15295	0	42.5789	38.7555	38.7685	374.047	197.81	266.255
NCU08750	isoamyl alcohol oxidase	73.767	247.429	1.74597	3.77e-09	92.9944	87.0905	104.004	313.332	188.701	222.804
NCU04847	cyclin	50.3353	247.239	2.29626	2.43e-12	63.0481	67.5654	81.3127	222.24	260.723	341.295
NCU03492	inositolphosphorylceramide-B C-26 hydroxylase	35.7847	247.057	2.78743	0	40.2866	42.1734	48.783	119.517	283.211	339.079
NCU04169	hypothetical protein	36.1528	244.113	2.75537	0	57.0386	48.6624	53.9639	77.827	388.96	359.656
NCU05899	flotillin domain-containing protein	48.8152	243.207	2.31678	1.31e-11	42.8287	52.9075	55.1217	87.4664	181.509	243.873
NCU01886	hypothetical protein	101.743	239.94	1.23775	0.00246971	115.335	142.664	135.698	163.46	278.165	318.67
NCU06265	hypothetical protein	572.852	234.127	-1.29087	0.000990287	688.326	639.999	625.078	247.947	222.559	207.061
NCU06207	C-5 sterol desaturase	48.1686	232.405	2.27048	6.85e-13	55.5641	55.9775	63.657	158.582	272.414	297.627
NCU10110	3-hydroxyisobutyrate dehydrogenase	10.4506	231.982	4.47236	0	10.9222	11.6462	10.1479	183.174	171.339	206.912
NCU01692	mitochondrial citrate synthase	103.371	231.209	1.16137	0.00026868	146.145	170.021	165.292	306.035	250.083	254.3
NCU10007	malate synthase, variant	102.299	229.526	1.16587	0.00167557	197.013	96.69	110.285	293.204	242.003	204.287
NCU10007	malate synthase, variant	102.299	229.526	1.16587	0.00167557	197.013	96.69	110.285	293.204	242.003	204.287
NCU04307	MSF1	11.2075	219.971	4.29477	0	12.8684	13.4894	13.5153	192.614	232.03	258.287
NCU09777	UPF0075 domain-containing protein	90.791	219.962	1.27664	2.24e-05	116.57	113.571	116.892	268.367	188.395	185.403
NCU01748	hypothetical protein	100.915	214.334	1.08673	0.00815277	97.7417	129.907	121.099	108.177	203.191	256.159
NCU07539	hypothetical protein	43.7774	211.797	2.27442	8.8e-14	61.1556	45.9743	57.5491	104.275	223.159	247.047
NCU05900	hypothetical protein	30.4472	211.041	2.79314	1.19e-07	28.5002	31.8922	25.8532	81.3136	170.433	236.65
NCU07817	non-anchored cell wall protein 3	40.4116	210.86	2.38345	1.02e-13	45.2107	52.0633	59.5795	78.9462	248.161	288.492
NCU07253	1,3-beta-glucanosyltransferase gel1	100.916	210.166	1.05837	0.00133583	146.585	133.779	154.573	231.174	206.361	239.129
NCU00729	hypothetical protein	79.9974	207.179	1.37286	1.04e-06	131.249	100.209	125.191	233.653	249.905	255.242
NCU03639	lipase	60.3518	207.116	1.77897	1.93e-10	80.9698	84.721	89.0493	216.34	228.273	221.076
NCU10014	hypothetical protein	29.1198	201.127	2.78803	0	32.0598	36.2383	43.6945	146.223	214.188	215.681
NCU09567	myo-inositol-1(or 4)-monophosphatase	24.8933	190.957	2.93942	0	27.2579	31.7908	29.9815	110.889	191.676	249.419
NCU02074	endoplasmic oxidoreductin-1	36.3194	189.682	2.38477	1.21e-12	40.4209	40.7533	49.0132	92.1076	189.044	232.595
NCU01422	multiprotein-bridging factor 1	67.817	189.681	1.48385	2.2e-07	80.0493	80.6136	76.5425	157.03	174.836	202.957
NCU11260	hypothetical protein	86.7678	189.532	1.12721	6.97e-05	133.479	128.159	125.676	218.202	214.904	229.1
NCU09582	chitin deacetylase	6.35617	186.795	4.87716	0	6.56664	5.92295	16.1376	309.274	109.81	156.642
NCU01922	hypothetical protein	31.0787	182.604	2.55472	5.96e-14	31.0079	36.0585	38.6001	317.141	116.36	113.425
NCU08707	iron sulfur assembly protein	30.6863	180.793	2.55867	0	37.182	34.3444	41.1381	121.02	190.646	225.051
NCU05525	DUF833 domain-containing protein	61.8692	180.732	1.54656	6.36e-08	63.811	67.3022	65.8828	113.536	167.524	175.341
NCU00247	hypothetical protein	40.3025	176.845	2.13355	2.18e-12	39.6853	51.0157	56.6915	202.211	149.74	186.927
NCU04533	DUF1881 domain-containing protein	400.484	173.046	-1.21059	0.000697837	433.695	424.207	292.938	14.5584	167.295	178.852
NCU05390	mitochondrial phosphate carrier protein	39.0144	171.023	2.13211	2.63e-13	54.8421	52.0734	46.428	133.733	190.219	224.689
NCU02307	hypothetical protein	533.342	169.753	-1.65162	1.03e-06	744.129	645.644	617.713	199.17	188.533	149.022
NCU04501	hypothetical protein	25.7225	169.028	2.71616	1.95e-10	51.7896	52.2262	51.4575	191.911	239.121	304.198
NCU08791	catalase-1	335.385	167.12	-1.00493	0.00684025	443.856	449.703	428.41	189.582	162.523	163.571
NCU03188	sugar 1,4-lactone oxidase	353.583	166.36	-1.08774	0.00244711	443.426	427.353	445.607	159.205	169.806	157.673
NCU02191	hypothetical protein	77.778	166.293	1.09629	0.00118	75.4945	93.267	96.1558	121.108	170.174	171.998
NCU04932	hypothetical protein	34.7947	166.184	2.25584	0	50.6671	45.5141	52.0674	173.165	206.346	180.252
NCU08398	aldose 1-epimerase	12.352	166.152	3.74969	0	13.3617	11.095	14.655	198.339	121.24	131.843
NCU06123	phosphoketolase	65.8094	165.816	1.33322	0.000306527	74.503	71.8175	72.127	82.1827	179.041	194.467
NCU07063	hypothetical protein	68.2766	165.222	1.27494	3.56e-05	68.6204	71.2904	66.25	100.392	154.37	151.298
NCU04268	hypothetical protein	25.1915	165.167	2.71292	0	23.2133	29.0128	29.53	98.9674	166.148	218.13
NCU11323	hypothetical protein	74.6983	162.732	1.12335	0.0003647	74.9442	74.0123	66.6238	65.975	185.189	199.489
NCU09076	ATP-dependent RNA helicase	62.2214	161.319	1.37444	5.92e-06	78.8569	88.0051	83.1356	151.004	187.569	194.591
NCU02096	flavohemoglobin	30.5215	160.724	2.39669	1.16e-13	33.4497	28.0175	36.0621	58.7215	176.04	200.554
NCU03660	FK506 suppressor Sfk1	22.6908	160.276	2.82038	8.87e-06	21.6444	25.0703	21.9989	89.4195	135.247	190.955
NCU07737	salicylate hydroxylase	39.2832	158.43	2.01186	2.17e-12	52.2747	36.3659	39.0053	100.005	168.634	135.255
NCU08378	ubiquitin C-terminal hydrolase CreB	30.033	155.867	2.3757	9.16e-11	31.5829	30.8577	27.7091	37.1755	122.562	202.805
NCU00326	calcium homeostasis protein Regucalcin	55.4831	151.132	1.44569	6.67e-07	66.8669	63.447	64.473	194.772	116.204	127
NCU08167	aerobactin siderophore biosynthesis protein	67.5939	150.541	1.15519	0.000241452	88.1213	81.9159	82.1099	104.861	156.492	192.77
NCU05591	ABC transporter CDR4	21.7552	147.615	2.76241	0	26.1192	31.0137	28.9863	165.582	141.916	169.822
NCU04914	hypothetical protein	298.124	146.642	-1.02362	0.000739153	365.616	369.49	417.831	109.16	173.028	158.858
NCU03634	hypothetical protein	34.9281	145.971	2.06322	0.00108529	34.9179	40.4066	42.6577	92.6512	143.397	155.874
NCU06383	UPF0075 domain-containing protein	39.4147	145.461	1.88383	9.96e-12	43.1955	45.0264	42.1887	149.892	112.377	124.378
NCU04904	hypothetical protein	67.1742	143.633	1.09641	0.000521789	81.5228	75.3347	65.6369	121.959	146.085	147.834
NCU06983	hypothetical protein	16.0478	142.174	3.14721	0	21.1743	25.9814	27.5162	139.134	166.248	181.927
NCU07414	DnaJ family protein	50.0941	139.844	1.4811	6e-05	53.2475	55.841	48.2684	94.5431	128.467	151.839
NCU05924	endo-1,4-beta-xylanase	4.73324	138.095	4.86669	0	1.28928	0.678317	16.4122	212.298	100.046	94.7262
NCU00866	DUF1275 domain-containing protein	31.8712	138.035	2.11471	6.62e-07	38.0685	40.4189	41.4008	81.193	152.427	176.269
NCU03813	formate dehydrogenase	60.1122	138.023	1.19918	0.000351675	73.8431	85.4694	84.6624	265.973	77.413	81.7451
NCU09663	Axe2	68.138	137.682	1.01481	0.000708343	82.9868	78.2718	78.7192	102.034	132.384	150.531
NCU00357	hypothetical protein	22.4734	136.762	2.60537	0	28.3263	27.9943	28.8822	74.0597	154.565	185.412
NCU00522	cystathionine beta-lyase	45.6993	135.529	1.56836	0.000612741	48.1804	48.4842	51.3	70.2996	117.062	139.056
NCU04791	short chain dehydrogenase/reductase	44.9111	134.293	1.58023	1.48e-08	50.8331	52.0664	42.5605	136.304	96.9189	133.836
NCU04493	hypothetical protein	65.2352	134.211	1.04078	0.000680626	78.2678	108.636	120.181	115.968	164.968	199.952
NCU10055	opsin-1	322.198	134.015	-1.26556	7.69e-05	334.064	423.914	352.393	147.112	122.398	112.993
NCU11787	hypothetical protein	36.4369	133.516	1.87354	1.14e-09	28.7509	45.3919	42.2075	108.477	101.062	124.832
NCU08769	conidiation-specific protein 6	658.281	132.407	-2.31372	0	867.638	616.461	677.304	147.745	120.47	113.072
NCU04315	dre-2	35.9836	132.187	1.87717	2.89e-10	45.0444	46.1975	46.5487	85.8451	123.384	164.444
NCU09176	hypothetical protein	10.7316	131.79	3.61831	0	10.5646	10.4956	8.64076	89.8632	86.3283	121.652
NCU06666	inositol-3-phosphate synthase	25.7148	130.319	2.34137	0	35.1958	33.8554	38.0406	115.775	138.767	159.302
NCU00836	hypothetical protein	1.45703	130.122	6.48069	0	1.83455	1.2151	2.99054	278.462	60.6336	77.3951
NCU09347	fructose-2,6-bisphosphatase	21.2503	130.113	2.61421	1.55e-14	25.871	24.3672	22.4314	41.4123	124.119	187.163
NCU02624	cytochrome P450 51	37.4895	129.901	1.79286	8.36e-10	45.6828	45.8768	49.1394	89.2126	155.99	160.046
NCU05159	acetylxylan esterase	7.86859	129.566	4.04144	0	10.9423	9.37784	10.7994	219.112	79.3451	98.149
NCU00992	hypothetical protein	48.5529	129.42	1.41443	4.84e-07	60.4856	56.8084	47.9774	121.551	125.402	127.732
NCU08288	hypothetical protein	31.3855	127.552	2.02292	7.51e-12	34.295	39.5771	38.4591	79.5567	134.352	174.06
NCU00867	hypothetical protein	47.8743	127.003	1.40754	0.00648574	61.2822	63.7141	72.3636	96.3988	153.759	161.908
NCU02573	FAM96B	50.9713	126.628	1.31284	6.96e-06	60.1818	56.2203	57.4581	97.9355	140.237	143.799
NCU00582	cryptochrome DASH	410.303	125.067	-1.71399	1.85e-07	351.912	454.748	427.17	92.8341	120.424	112.283
NCU04421	annexin XIV	40.7245	124.739	1.61494	1.82e-08	39.3153	51.4885	45.7537	99.5174	115.686	125.768
NCU11641	hypothetical protein	27.77	124.167	2.16069	8.8e-14	28.2361	31.3658	28.6749	75.9931	107.566	137.049
NCU03732	SIS1	42.2404	123.627	1.5493	1.05e-07	48.3481	44.2328	44.287	87.6862	109.147	135.683
NCU06915	hypothetical protein	252.264	123.499	-1.03044	0.00406566	232.046	234.095	200.202	96.1564	91.7704	94.1089
NCU08986	hypothetical protein	33.6303	122.173	1.86109	2.99e-08	45.4335	42.5725	50.2274	90.2594	157.805	169.622
NCU00206	cellobiose dehydrogenase CDH-1	5.23469	122.031	4.543	0	5.08847	5.14209	11.5079	254.036	60.5073	63.1098
NCU06532	dihydroorotate reductase PyrE	55.6082	121.33	1.12556	0.000507543	73.8508	71.8765	65.1797	72.6264	132.117	150.838
NCU07997	hypothetical protein	60.1876	120.697	1.00385	0.00101255	78.4409	70.6124	70.4546	133.607	119.813	101.611
NCU04193	hypothetical protein	43.0001	119.371	1.47303	1.05e-07	44.409	51.8682	46.5388	98.0373	116.756	129.957
NCU01906	GCY protein	31.4605	118.69	1.91559	1.86e-11	30.4213	35.9976	35.3507	111.852	103.59	116.903
NCU04542	hypothetical protein	50.0804	117.429	1.22948	3.51e-05	52.0817	60.4202	70.3341	67.8762	137.532	122.661
NCU07466	cystathionine beta-synthase	25.651	116.92	2.18843	1.97e-13	29.811	25.3389	24.6413	67.1319	98.7447	117.3
NCU01844	hypothetical protein	35.3918	116.416	1.7178	2.42e-05	34.9184	32.8694	30.3679	64.4439	93.37	114.321
NCU04637	BAR adaptor protein RVS167	37.2143	114.658	1.62341	2.4e-08	39.001	42.1898	42.4544	82.0308	97.1746	127.019
NCU03889	SNARE	47.2834	113.434	1.26245	1.05e-05	50.1593	56.4848	49.3683	119.179	99.9912	114.038
NCU01080	glucanase B	22.4866	112.953	2.32858	3.02e-14	21.2179	25.0966	20.2189	45.6476	88.2326	122.056
NCU01298	hypothetical protein	46.1981	112.138	1.27937	0.000270092	51.4327	50.4552	52.9361	2.49629	156.419	133.024
NCU01808	cytochrome c	29.3667	111.944	1.93052	1.14e-09	32.9156	34.0077	41.887	103.682	131.515	135.602
NCU10020	methionine synthase	49.9666	111.63	1.15969	3.41e-05	66.6061	62.1002	66.667	135.505	90.5375	89.8459
NCU09823	hypothetical protein	28.7869	111.447	1.95287	1.03e-11	37.587	27.1453	25.3583	58.5179	127.875	108.889
NCU08807	DNA-binding protein cre-1	40.3251	110.723	1.45721	6.97e-07	45.9203	49.0948	55.4926	83.0523	128.573	129.926
NCU03284	hypothetical protein	47.8366	110.458	1.20731	2.62e-05	67.3631	59.2434	61.3145	142.613	112.875	116.499
NCU03651	NADP-dependent malic enzyme	9.52629	109.86	3.52761	0	15.8993	8.49051	8.812	36.163	123.062	169.803
NCU03659	serine/threonine-protein kinase	17.7132	108.829	2.61917	0	18.8745	19.2903	19.1772	76.6228	81.4809	107.876
NCU03633	mevalonate kinase	41.226	107.229	1.37907	4.85e-06	43.3144	43.227	41.3493	54.4734	96.6183	109.322
NCU02475	glycine dehydrogenase	13.1823	106.125	3.00909	0	16.6828	13.3497	17.4149	49.9063	123.589	137.009
NCU08870	hypothetical protein	35.5846	104.373	1.55242	3.37e-08	40.6989	38.185	40.9244	83.1498	116.132	117.134
NCU06364	GDSL lipase/acylhydrolase	12.5175	103.515	3.04782	0	14.4838	16.239	15.6873	114.796	87.9899	113.022
NCU02504	DUF1640 domain-containing protein	10.6458	101.951	3.25952	0	13.8769	12.2708	14.707	92.9552	95.4561	102.892
NCU06114	hypothetical protein	13.1371	95.8695	2.86743	1.29e-13	13.6928	14.8459	15.218	51.0807	99.4915	120.747
NCU10987	MFS transporter Fmp42	37.2878	95.8173	1.36158	5.95e-06	52.6922	51.5575	52.0134	64.2789	111.94	142.711
NCU08674	pentatricopeptide repeat protein	8.9061	95.4225	3.42146	0	11.915	12.1918	12.294	28.5595	113.969	157.038
NCU05955	Cel74a	14.337	94.1406	2.71507	0	20.4894	20.1219	20.6556	172.844	58.7111	67.22
NCU07351	alpha-glucuronidase	5.38748	93.3651	4.1152	0	5.58704	6.41942	6.47666	9.43445	98.986	150.4
NCU06425	hypothetical protein	13.9866	93.2568	2.73716	0	17.6406	16.3044	13.3904	45.4197	98.6771	124.702
NCU05309	Cut9 interacting protein Scn1	40.4711	93.2072	1.20355	4.03e-05	34.9639	55.8629	41.5106	54.3956	93.1306	102.34
NCU11744	mitochondrial pyruvate dehydrogenase kinase	40.51	91.4509	1.17472	2.92e-05	49.9463	45.4175	45.925	87.0568	78.3383	85.1719
NCU04862	hypothetical protein	256.062	90.9846	-1.4928	4.14e-08	275.908	282.794	185.642	60.1124	76.7423	79.1989
NCU06042	FAD dependent oxidoreductase	21.6233	90.7794	2.06978	6.04e-13	25.7463	24.9928	24.538	121.429	65.6621	70.9697
NCU09738	alpha-ketoglutarate dependent xanthine	40.1238	90.3266	1.17069	0.000110535	54.1586	33.5327	35.052	117.438	64.9062	53.5367
NCU08687	galactokinase	25.3472	89.3076	1.81696	2.84e-10	39.1909	29.3695	25.5892	129.175	71.3614	71.5345
NCU02128	D-arabinitol dehydrogenase	42.7575	89.289	1.0623	0.000695606	42.0417	50.3362	48.7844	134.734	56.9912	62.739
NCU04591	pentachlorophenol monooxygenase	5.19394	89.2142	4.10237	0	5.11917	5.65063	5.47124	11.5063	77.5711	124.498
NCU05351	hypothetical protein	17.6582	88.6518	2.32781	5.51e-05	14.6556	23.1722	12.3635	38.0185	79.4986	99.3856
NCU01816	allantoicase	36.4075	88.5887	1.28289	4.87e-06	49.7589	32.463	35.5508	91.7729	75.2047	64.8407
NCU06332	alpha/beta hydrolase	12.3368	88.5489	2.84351	3.51e-10	13.4006	13.7678	13.0048	40.8193	78.5776	112.194
NCU03297	cytochrome c peroxidase, variant	37.8553	88.2029	1.22033	3.13e-05	46.3648	47.9513	38.4336	59.378	82.4157	120.681
NCU03297	cytochrome c peroxidase, variant	37.8553	88.2029	1.22033	3.13e-05	46.3648	47.9513	38.4336	59.378	82.4157	120.681
NCU00595	ubiquitin thiolesterase	40.8453	87.9407	1.10636	0.000428795	47.1583	48.4421	51.3763	71.6363	90.708	102.509
NCU07108	hypothetical protein	23.785	87.867	1.88527	1.78e-09	25.6889	22.6467	21.7671	34.616	82.7528	93.8894
NCU00644	ATP synthase subunit G	31.402	87.4012	1.4768	1.69e-07	40.3741	40.9179	33.7672	66.7641	97.5719	103.935
NCU04156	C-8 sterol isomerase erg-1	25.4125	86.6896	1.77032	1.99e-08	33.5089	35.4001	43.3316	85.8536	97.3264	108.888
NCU08314	hypothetical protein	28.1579	86.6851	1.62225	5.46e-08	30.688	34.1345	34.1889	65.5221	81.2515	91.4258
NCU02665	diacylglycerol O-acyltransferase	35.6803	86.4256	1.27633	1.05e-05	46.0498	35.035	35.9561	65.7883	80.3416	89.1726
NCU10572	short chain oxidoreductase	23.2642	85.5192	1.87814	1.47e-09	30.2334	22.2283	26.1622	105.194	78.7389	66.0246
NCU04506	hypothetical protein	22.3656	85.2748	1.93084	3.2e-10	27.7244	26.8164	20.9888	53.8267	80.4148	102.735
NCU06939	endosome-associated ubiquitin isopeptidase	25.1047	84.6772	1.75402	9.18e-10	29.3594	26.5842	25.454	50.0703	85.9742	87.2423
NCU06923	methionine aminopeptidase 1	21.4247	84.6368	1.98201	3e-11	24.7558	25.5632	28.5894	52.3765	95.9982	95.0453
NCU06719	MSF1 domain-containing protein	36.5962	83.5265	1.19054	3.16e-05	44.3739	45.265	44.564	63.7563	95.7383	97.8362
NCU04473	polysaccharide export protein	39.9632	82.627	1.04794	0.000357662	44.974	48.4256	51.7146	60.532	80.9201	84.31
NCU06005	glycerol kinase	214.915	82.5422	-1.38056	2.8e-06	286.935	287.826	290.923	98.3337	75.1642	85.4544
NCU09629	hypothetical protein	21.085	81.7721	1.95539	8.1e-11	25.8242	26.3231	25.7013	47.3037	85.3946	110.716
NCU05974	cell wall glucanosyltransferase Mwg1	28.1436	81.5097	1.53417	3.73e-08	27.7508	37.8093	44.7045	73.3695	88.4355	96.9817
NCU00144	hypothetical protein	26.2933	81.2468	1.62762	3.06e-08	26.4376	25.5848	29.6855	34.3041	82.8007	92.2581
NCU09776	hypothetical protein	38.9317	80.7558	1.05262	0.00237459	64.2633	58.8212	60.2082	137.556	81.9923	73.1032
NCU07016	hypothetical protein	12.6987	80.225	2.65938	0	14.5754	13.3351	11.7283	32.2595	87.6374	110.985
NCU05435	hypothetical protein	15.2097	79.854	2.39237	1.55e-14	17.6015	18.314	20.3872	42.2	81.868	122.931
NCU00915	aspartyl-tRNA synthetase	33.1785	79.4234	1.25931	2.07e-05	39.3992	40.026	37.7857	51.1272	81.4892	82.7195
NCU11041	hypothetical protein	15.2065	78.9046	2.37542	2.62e-12	20.1918	19.9659	19.1897	54.3817	95.7488	112.052
NCU08191	hypothetical protein	36.2859	78.7077	1.1171	0.00241542	47.5748	45.8052	51.805	99.0048	70.933	77.0995
NCU07081	lipase	32.7542	78.7064	1.2648	2.05e-05	41.3538	41.1229	34.6031	51.5007	76.8116	104.698
NCU07503	hypothetical protein	26.09	78.622	1.59143	2.39e-05	30.3129	26.9626	26.3592	62.1152	66.0808	70.7476
NCU08824	molybdopterin binding domain-containing protein	160.038	78.5743	-1.02629	0.000392332	178.956	169.5	173.289	93.3354	74.6453	63.599
NCU02244	C2 domain-containing protein	17.4559	78.3789	2.16675	6.51e-13	14.6648	23.6654	21.6066	47.4355	71.6976	92.7121
NCU06836	acetyl-coenzyme A synthetase	33.9109	77.4117	1.1908	3.97e-05	45.9659	42.0752	41.6039	90.5719	75.9876	71.7576
NCU02130	hypothetical protein	163.825	77.1456	-1.0865	0.000270019	204.541	186.682	158.451	84.2156	69.8041	62.6116
NCU02240	endoglucanase II	6.87375	76.645	3.47902	0	9.20191	7.38143	10.6608	117.834	63.1458	54.9964
NCU05574	hypothetical protein, variant	19.2223	76.2841	1.9886	2.31e-08	16.4761	17.9128	14.6512	88.9391	44.7823	62.9567
NCU05574	hypothetical protein, variant	19.2223	76.2841	1.9886	2.31e-08	16.4761	17.9128	14.6512	88.9391	44.7823	62.9567
NCU10106	mitochondrial triosephosphate isomerase	6.72142	74.3633	3.46775	0	6.04204	6.32013	5.80236	73.0009	51.3351	62.5693
NCU08695	hypothetical protein	10.6999	74.3415	2.79657	0	13.2849	12.3788	13.2012	30.5258	86.5109	110.07
NCU00684	endonuclease/Exonuclease/phosphatase, variant	15.6347	73.9944	2.24267	3.1e-13	11.6909	15.996	14.105	34.3254	57.0285	75.0526
NCU00684	endonuclease/Exonuclease/phosphatase, variant	15.6347	73.9944	2.24267	3.1e-13	11.6909	15.996	14.105	34.3254	57.0285	75.0526
NCU11442	hypothetical protein	9.85258	73.4059	2.89732	1.46e-12	8.19686	10.6952	17.1683	68.5368	62.6576	80.286
NCU09213	hypothetical protein	25.5921	73.3902	1.51989	2.87e-06	35.8004	35.0341	26.7002	16.1415	103.817	99.0385
NCU05775	amino acid transporter	20.407	73.3307	1.84535	1.53e-09	29.7018	28.3292	28.7997	45.3239	91.4921	104.478
NCU01427	geranylgeranyl pyrophosphate synthetase	261.68	73.2954	-1.83601	1.36e-10	305.157	287.9	271.046	84.6767	65.8414	61.7281
NCU03257	ammonium transporter MEP1	33.376	72.5933	1.12103	8.56e-05	46.3131	39.8439	40.7591	67.5871	79.5118	81.5931
NCU00520	oxidoreductase	17.3635	72.4404	2.06074	1.13e-11	14.7969	17.3092	18.115	24.3342	68.794	73.3631
NCU03408	hypothetical protein	8.07733	72.2611	3.16127	0	9.30819	6.99014	6.37836	31.6214	67.2932	80.7815
NCU07741	1-acyl-sn-glycerol-3-phosphate acyltransferase	31.3039	71.146	1.18444	3.58e-05	41.9469	36.3268	35.3223	63.5853	68.0641	86.177
NCU01750	hypothetical protein	34.8439	70.1826	1.01021	0.00496854	51.5298	45.3657	38.4943	70.7846	80.7966	85.8838
NCU05985	glycerol-3-phosphate O-acyltransferase	19.9458	69.9402	1.81003	4.63e-10	24.358	21.8295	24.5299	43.4835	70.7317	81.85
NCU01369	ATP-dependent RNA helicase ded-1	29.6989	69.5016	1.22664	0.000142129	29.4106	42.3638	41.0727	37.791	84.2854	88.1791
NCU06518	NADH-cytochrome b5 reductase 2	33.7188	69.5006	1.04347	0.000428293	39.655	35.5772	34.1594	60.0525	65.4943	65.7159
NCU09498	hypothetical protein	12.4187	69.3671	2.48174	2.73e-13	16.1858	17.0524	17.5403	54.9732	77.8469	80.7718
NCU02080	hypothetical protein	27.8304	69.0666	1.31133	0.000172647	43.8675	35.6373	32.3314	37.2468	95.4332	109.569
NCU03070	hypothetical protein	31.1312	68.418	1.13602	8.48e-05	36.5006	35.5876	33.5663	45.6528	68.104	70.3922
NCU06233	hypothetical protein	14.2932	68.3249	2.25708	4.88e-13	16.851	16.0711	16.0449	27.5337	66.6303	92.2013
NCU05593	mitochondrial outer membrane beta-barrel protein	18.1216	67.8868	1.90542	0.00251607	26.707	23.4411	26.4699	62.0248	69.9445	80.3932
NCU09274	hypothetical protein	473.422	67.7567	-2.80469	0	546.118	527.499	381.632	35.2821	55.0259	73.3382
NCU03607	threonine dehydratase catabolic	26.374	67.3715	1.35302	5.57e-05	27.7144	29.3265	22.3114	56.1967	56.9053	56.8772
NCU00811	hypothetical protein	25.5171	66.8489	1.38944	1.53e-06	30.5508	34.3581	41.037	51.3991	79.0549	89.2782
NCU08988	hypothetical protein	33.0585	66.3952	1.00606	0.000801082	35.1206	38.2037	36.128	61.9862	64.6521	70.6439
NCU04923	Gld1	28.1923	66.1402	1.23022	2.02e-05	36.5232	34.4046	34.0918	70.6842	75.7278	50.6819
NCU07325	conidiation-specific protein con-10	153.371	65.8819	-1.21907	5.14e-05	221.872	159.114	220.528	74.9202	77.3778	48.8207
NCU05005	HHE domain-containing protein	134.115	65.6573	-1.03045	0.000425744	171.705	170.071	172.221	98.793	58.165	50.0295
NCU08907	BYS1 domain-containing protein	29.1876	65.6455	1.16934	0.00200324	21.906	32.8785	35.3702	22.61	58.3468	80.2771
NCU08985	protein tyrosine phosphatase	28.6633	65.6388	1.19535	0.00313623	31.3229	35.6345	36.7319	51.8136	66.3157	76.0294
NCU00890	beta-mannosidase	7.94711	65.3132	3.03887	0	9.47821	8.23213	8.48328	58.8917	58.919	49.9867
NCU01353	mixed-linked glucanase	28.5058	65.31	1.19605	4.8e-05	36.6386	37.3045	33.5945	46.6724	72.4482	79.0182
NCU03145	oxidative stress resistance	32.2722	64.6531	1.00243	0.000829953	34.6814	38.1967	35.2955	40.3666	64.2069	70.8951
NCU03697	FAD binding domain-containing protein	9.43296	64.39	2.77105	0	10.1071	11.2749	12.4931	16.9487	81.365	85.6181
NCU00939	hypothetical protein	128.335	63.9367	-1.00519	0.00591638	136.963	145.639	139.79	54.5904	67.6339	55.6018
NCU02727	glycine cleavage system T protein	15.7633	63.6255	2.01304	5.37e-12	22.5289	14.5276	15.5969	44.7473	54.0711	57.9736
NCU07705	clr-1	29.3633	63.5679	1.11428	0.00116707	36.3881	35.4055	33.5867	96.9596	52.7826	48.0501
NCU02875	hypothetical protein	29.4404	62.8688	1.09455	0.000202342	30.4394	33.7614	35.3429	42.316	69.0448	62.6861
NCU02194	hypothetical protein	16.1635	62.183	1.94378	3.75e-10	18.2217	20.3276	19.1748	23.7412	78.0396	100.993
NCU10045	pectinesterase	17.457	61.8949	1.82602	5.68e-08	23.7521	19.2832	20.3973	71.6442	48.5125	55.5329
NCU02855	endo-1,4-beta-xylanase A	5.43313	60.8686	3.48584	2.09e-13	4.66974	4.30267	16.8217	107.615	33.9665	50.6287
NCU08784	hypothetical protein	24.767	60.7033	1.29336	6.07e-05	26.3745	26.5307	20.2238	24.9992	53.9836	62.1641
NCU05691	hypothetical protein	16.3163	59.649	1.87018	2.71e-09	17.5139	17.6506	13.2196	26.3453	53.4738	62.7135
NCU00358	hypothetical protein	17.1538	59.5115	1.79464	6.36e-08	17.8124	18.9352	16.9903	50.1471	54.5338	59.1721
NCU07546	multidrug resistance protein MDR	11.1255	59.3065	2.41432	0	13.048	14.8109	13.1168	66.5048	58.8421	56.3266
NCU00289	hypothetical protein	25.9007	58.1212	1.16607	3.95e-05	27.1073	31.9935	31.6888	54.2485	59.3056	55.0842
NCU05844	hypothetical protein	12.7404	58.0013	2.18667	5.06e-05	14.2006	17.6895	14.3583	41.804	56.954	52.3388
NCU02164	hypothetical protein	138.679	57.7309	-1.26433	1.19e-05	160.348	161.102	108.311	36.5348	57.01	52.0944
NCU04475	lipase B	22.3329	57.2404	1.35786	9.41e-06	31.3421	27.4914	24.692	74.6334	38.1116	47.5192
NCU04543	hypothetical protein	25.7047	55.934	1.12169	0.00135696	24.8323	33.8416	35.3795	38.7774	57.5734	59.4553
NCU08048	NAD dehydrogenase	25.0509	55.9198	1.1585	0.000141048	25.8625	26.7005	23.7562	32.8641	45.8429	55.4362
NCU05350	hypothetical protein	6.19334	55.5887	3.166	0	5.7473	7.22501	8.43628	65.2019	44.5085	53.0199
NCU09568	hypothetical protein	8.20262	55.5614	2.75993	3.05e-12	10.2768	11.7811	10.2427	46.2161	51.4166	69.5354
NCU05225	mitochondrial NADH dehydrogenase	25.4312	55.2976	1.12062	0.00014731	30.1135	33.4584	35.7895	42.9457	52.3413	66.6085
NCU05006	cytochrome P450	115.78	55.2563	-1.06717	0.00011995	141.975	147.656	122.6	53.675	56.9081	48.7705
NCU06167	MFS monocarboxylate transporter	20.8409	55.066	1.40174	2.63e-06	28.709	26.6925	26.9118	47.9414	63.3909	62.7241
NCU09686	clock-controlled protein 8	23.2974	54.7782	1.23343	5e-05	25.8955	29.135	27.4235	24.6956	65.536	69.4737
NCU07468	NAD dependent epimerase/dehydratase	21.2687	54.2826	1.35176	9.41e-06	24.6717	25.2342	23.2097	26.6596	64.195	49.7546
NCU05922	hypothetical protein	10.0619	54.2494	2.43071	6.04e-13	6.06551	9.92461	9.85917	19.0883	41.7459	55.0172
NCU04596	gamma-cysteine synthetase regulatory subunit	26.9266	54.0683	1.00575	0.00140658	30.8785	30.3827	33.7942	31.1428	54.9922	63.4347
NCU03197	serine/threonine-protein kinase psk1	25.0478	53.738	1.10126	0.000697838	25.8457	30.1031	27.6269	16.9722	56.6773	70.596
NCU11901	hypothetical protein	7.59224	53.6931	2.82214	1.92e-08	6.88622	10.3511	8.58995	61.8652	47.2637	59.0883
NCU01972	hypothetical protein	176.527	53.5155	-1.72186	1.29e-10	216.235	205.131	161.01	32.1274	60.9697	53.8389
NCU04172	hsp70-like protein	15.3412	53.2077	1.79422	2.55e-07	14.4901	17.0471	15.3294	25.9113	48.1761	60.8493
NCU04277	homoserine kinase	18.391	53.1747	1.53174	3.77e-07	21.1949	21.0559	22.8871	46.3475	54.7092	53.4456
NCU01944	hypothetical protein	5.39438	52.988	3.29614	0	6.4569	6.47782	6.34418	30.8144	47.7716	75.9949
NCU10521	hypothetical protein	6.27767	52.7316	3.07037	1.97e-13	7.12535	7.98247	7.79243	71.336	37.1707	51.6727
NCU00859	hypothetical protein	170.028	52.5552	-1.69387	3.55e-09	221.554	213.818	182.808	70.2187	40.5569	40.8942
NCU05569	hypothetical protein	17.8005	52.3221	1.5555	0.000399153	27.2129	23.9312	20.7667	43.9611	57.7096	62.9033
NCU01866	lactonohydrolase	6.49545	51.8197	2.996	0	7.4492	7.77198	7.32949	66.3517	40.5335	52.1921
NCU01013	delta-aminolevulinic acid dehydratase	25.1841	51.7813	1.03992	0.00037138	31.0476	39.6415	38.4215	57.9124	57.6503	62.4226
NCU04010	malonyl CoA-acyl carrier protein transacylase	23.3454	51.3831	1.13816	0.000160849	23.2721	22.6279	23.0123	28.2001	42.501	49.8671
NCU01807	hypothetical protein	17.2832	51.2931	1.56939	8.27e-06	20.3909	18.7755	16.5963	47.3683	41.8133	40.8702
NCU05692	hypothetical protein	19.9348	51.0386	1.3563	0.00343086	26.6896	19.2803	15.4837	44.2353	45.8913	43.9226
NCU05340	alkanesulfonate monooxygenase	15.9489	50.5696	1.66481	5.96e-08	23.1006	19.3694	20.0108	39.7306	56.7549	65.4734
NCU03781	CobW domain-containing protein	13.9225	49.8687	1.84072	1.48e-06	12.9399	12.6449	11.6643	29.9362	43.63	46.2597
NCU01907	syntaxin 5	22.1853	49.3306	1.15288	0.000266408	23.286	26.9049	25.0547	31.1597	43.1436	59.1496
NCU07221	two-component system protein A	23.7074	49.1893	1.05301	0.000464492	23.5331	28.282	29.0488	35.8427	47.1385	53.5722
NCU03117	inosine-5'-monophosphate dehydrogenase IMD2	12.5398	49.0088	1.96653	2.48e-09	11.7589	19.4198	18.3245	20.2179	60.585	71.5048
NCU05067	golgi transport complex component Cog5	17.0254	48.828	1.52002	3.15e-06	21.4211	20.2498	19.2422	34.0207	45.5262	56.6347
NCU05542	xanthine phosphoribosyltransferase 1	14.6586	48.5618	1.72808	8.06e-06	20.6467	18.1291	21.334	47.7831	58.5278	46.1161
NCU08319	developmental regulator flbA	21.9951	48.0858	1.12842	7.45e-05	26.2431	28.2435	30.7233	43.1189	54.9768	52.115
NCU07787	clock controlled protein CCG-14	22.0937	47.9358	1.11747	0.00361713	18.3433	19.8549	22.5531	22.9516	41.712	48.6454
NCU06387	hypothetical protein	10.312	47.6277	2.20747	1.79e-11	12.2688	11.7775	9.94035	50.6981	41.9943	40.593
NCU08699	bli-4 protein	122.947	47.3207	-1.37749	4.9e-07	103.545	134.931	113.602	22.5778	42.8063	43.7277
NCU06206	hypothetical protein, variant	20.8409	47.1104	1.17663	0.00144145	20.8962	23.5306	21.177	45.2269	43.4174	44.1133
NCU06206	hypothetical protein, variant	20.8409	47.1104	1.17663	0.00144145	20.8962	23.5306	21.177	45.2269	43.4174	44.1133
NCU03293	hypothetical protein	9.30673	47.0844	2.3389	3.77e-09	13.0158	11.5054	18.1395	43.1762	61.113	79.0304
NCU08115	DNA mismatch repair protein Msh3	8.65491	46.702	2.43189	0	9.8573	10.8035	9.89031	53.7402	37.8479	42.5358
NCU07017	hypothetical protein	15.1355	46.3741	1.61539	2.72e-06	15.7741	20.7282	23.2632	27.2217	52.4295	53.0973
NCU02798	hypothetical protein	21.5609	46.2601	1.10135	0.00172314	24.1395	23.0307	22.6412	17.5793	42.4532	59.0848
NCU06924	kynurenine 3-monooxygenase	17.5315	45.998	1.39162	9.39e-06	21.0236	21.3451	21.1572	34.3401	44.1194	48.5222
NCU03131	FAD dependent oxidoreductase superfamily	10.1709	45.8483	2.17242	6.46e-10	10.2157	10.8137	9.47299	30.8405	34.7589	46.0575
NCU08626	deoxyribodipyrimidine photolyase	137.494	44.9596	-1.61267	1.88e-09	109.339	149.211	128.27	26.2054	44.8705	38.053
NCU03135	hypothetical protein	19.5914	44.5622	1.1856	0.000101746	18.0262	15.9343	17.1862	28.5578	35.0416	34.5026
NCU07327	hypothetical protein	18.2004	43.8813	1.26964	0.000571849	20.3594	18.6867	17.7576	31.5908	41.1493	48.7449
NCU09271	hypothetical protein	88.2582	43.3502	-1.02569	0.000382597	99.2042	88.2463	67.4032	24.2905	39.0773	39.9326
NCU05222	CTLH domain-containing protein	90.9227	43.1788	-1.07432	0.000191026	122.906	121.819	119.249	62.2339	47.6058	31.0978
NCU05805	serine hydroxymethyltransferase	16.4834	42.9007	1.37999	9.89e-06	27.4318	19.3712	22.7652	51.9796	40.846	41.1584
NCU04058	hypothetical protein	19.48	42.6627	1.13098	0.00106522	20.4549	26.4028	25.8637	60.8221	39.4745	31.1454
NCU03381	phosphatidate cytidylyltransferase	12.7392	42.4218	1.73553	3.37e-08	14.4389	16.2512	16.4097	23.5506	41.6938	52.6732
NCU01882	purine transporter	20.8768	42.2113	1.01573	0.000550694	25.7899	25.0502	25.5257	41.7163	44.855	42.8209
NCU08476	hypothetical protein	13.549	42.0958	1.6355	1.33e-06	13.7794	12.1894	10.4253	26.1773	32.2611	36.251
NCU01430	hypothetical protein	12.7419	42.0167	1.72138	1.18e-08	13.5653	14.8742	11.4997	30.4024	36.4026	44.133
NCU04603	hypothetical protein	17.3248	41.8064	1.27089	7.62e-05	23.1006	21.8454	25.6428	29.2779	52.5848	63.0956
NCU06509	hypothetical protein	19.8714	41.7676	1.07169	0.000705276	20.7024	22.2382	28.6933	30.2524	52.132	48.8113
NCU03887	CreD	17.7612	41.6264	1.22877	5.8e-05	17.6951	22.4888	20.107	18.1939	45.6357	52.5277
NCU00576	hypothetical protein	17.5048	41.4958	1.24522	5.69e-05	25.1753	22.8345	23.0282	36.2897	48.2761	51.2384
NCU01386	hypothetical protein	16.3797	41.3482	1.33592	2.63e-06	18.802	18.15	15.2296	26.2387	39.5045	45.8032
NCU02182	hypothetical protein	17.174	41.2513	1.26421	1.5e-05	16.3078	20.0711	20.9788	26.5412	37.7084	43.7236
NCU00868	hypothetical protein	13.8098	40.2757	1.54422	3.19e-06	15.6483	16.4582	16.1991	23.8993	41.6338	49.327
NCU09559	clock-controlled protein 9	13.024	40.1195	1.62313	2.72e-07	16.0777	16.551	14.5808	12.254	52.9732	48.4
NCU09264	APAF1-interacting protein	17.6323	39.881	1.17748	0.00445778	17.6897	19.3621	19.5197	40.6403	33.5284	34.3705
NCU07693	stu-1	11.5025	39.6912	1.78687	4.03e-09	13.2943	14.0683	13.0852	18.1998	40.4495	54.7948
NCU06174	DUF1649 domain-containing protein	15.8842	39.2439	1.30488	1.6e-05	15.8214	14.4767	11.8966	19.7262	31.5529	34.6849
NCU09505	hypothetical protein	7.38778	38.9634	2.39891	2.42e-10	8.46769	8.88814	10.8748	43.216	35.152	42.8173
NCU08042	clr-2	1.00654	38.8547	5.27062	0	1.03635	0.646109	1.79278	54.135	28.8615	32.5415
NCU09270	hypothetical protein	85.8777	38.6721	-1.15099	9.55e-05	108.552	98.6339	89.1007	39.4944	36.5607	31.1985
NCU00980	hypothetical protein	15.965	37.8856	1.24674	0.000141623	15.2613	16.6651	15.0634	16.5113	29.9833	37.0327
NCU02485	hypothetical protein	3.41862	37.8421	3.46851	0	3.91398	3.83989	3.55122	53.3446	20.4146	27.0528
NCU04419	2-oxoglutarate-dependent	12.0427	37.8192	1.65096	4.17e-07	14.1087	13.5415	14.4591	14.4431	44.9981	44.7648
NCU08455	hypothetical protein	124.906	37.7812	-1.7251	7.78e-08	144.683	154.047	158.387	64.3884	29.034	25.1233
NCU06424	aminomethyl transferase	16.247	37.6401	1.2121	0.00037138	19.7231	17.1524	16.517	24.7426	32.5847	38.7886
NCU05168	arginine transporter	9.98022	37.5143	1.9103	3.5e-09	13.8014	16.2556	15.6871	32.6487	48.2977	53.8269
NCU02915	hypothetical protein	11.3059	37.4149	1.72654	2.21e-07	14.5322	13.4757	13.3929	59.2183	24.3938	26.6991
NCU08850	UV-endonuclease UVE-1	93.7562	37.2069	-1.33334	7.71e-07	105.319	108.139	106.285	26.3717	37.9212	36.0224
NCU03043	C2H2 finger domain-containing protein FlbC	175.527	36.9787	-2.24693	0	230.83	225.379	189.31	46.536	40.5256	30.271
NCU01589	heat shock protein 60	8.86508	36.8946	2.05721	5.97e-10	8.72137	13.3524	12.5498	26.3752	35.8866	46.7381
NCU07736	PEP5	6.42055	36.7986	2.51888	4.64e-10	10.2525	9.18855	9.52029	21.195	62.3359	47.5208
NCU02560	hypothetical protein	15.0531	36.6482	1.28368	0.000472776	22.5963	14.4304	16.8376	47.6709	30.6611	25.583
NCU00561	hypothetical protein	95.3435	36.6442	-1.37955	2.22e-07	108.097	98.4556	64.4283	28.6277	32.4248	32.2697
NCU06142	hypothetical protein	12.1407	36.5115	1.5885	6.65e-06	12.1684	13.7812	13.5023	31.3478	28.2915	33.0924
NCU07176	hypothetical protein	73.3073	35.4638	-1.04761	0.000379143	66.685	80.0589	56.0767	16.2988	30.3304	34.8168
NCU09077	Rpr2 domain-containing protein	13.9143	35.4336	1.34855	0.000382597	14.3507	14.3667	12.3801	31.9081	25.6817	30.0762
NCU08193	hypothetical protein	13.8127	35.0927	1.34517	0.00148465	17.0976	18.6629	19.5504	35.442	33.8256	35.8745
NCU09098	tetracycline transporter	8.76406	34.8756	1.99255	7.04e-07	14.2411	14.5062	11.7812	33.5741	43.9722	52.5543
NCU07979	hypothetical protein	13.6587	34.8058	1.34951	0.000223494	12.1927	12.5017	8.56413	18.3071	26.0182	30.0887
NCU09295	hypothetical protein	12.8695	34.5519	1.42481	4.37e-05	12.3883	14.1471	13.2456	25.5934	30.328	32.998
NCU06331	hypothetical protein	14.3369	34.4172	1.26339	4.31e-05	14.7339	15.5849	15.0525	18.2071	29.8681	34.8136
NCU08326	mitochondrial carrier protein LEU5	9.17293	34.3857	1.90635	5.98e-08	12.0873	9.4873	10.266	25.4968	33.082	38.2222
NCU04865	polyketide synthase 3	99.4325	34.378	-1.53223	2.03e-06	115.088	137.717	101.469	25.878	31.5509	35.334
NCU08292	hypothetical protein	16.392	34.361	1.06779	0.000300004	20.2424	20.061	21.5797	37.6904	36.0224	34.0819
NCU09524	hypothetical protein	2.87612	34.0534	3.5656	3.02e-14	4.06761	3.53934	4.18676	67.6754	19.5553	20.1513
NCU04522	hypothetical protein	2.23759	33.6076	3.90877	0	3.30187	2.40984	1.85458	50.2352	16.9003	30.7329
NCU00709	beta-xylosidase	1.37313	33.5425	4.61045	0	1.71255	1.67394	1.61047	34.7019	28.4663	35.6426
NCU03035	hypothetical protein	73.5155	33.5007	-1.13386	4.72e-05	72.5141	90.7868	100.95	27.3265	33.6036	41.7079
NCU05601	cytochrome c heme lyase	11.0007	33.385	1.60161	2.91e-05	13.0467	12.8986	14.1405	18.4046	34.8658	37.8229
NCU07080	hypothetical protein	14.7537	33.3163	1.17515	0.00361076	15.7883	13.7813	9.87148	9.75089	24.9553	38.8169
NCU08748	hypothetical protein	16.2765	33.2538	1.03073	0.00227304	19.0266	19.1198	21.5115	34.5712	27.6568	30.1089
NCU09273	hypothetical protein	177.382	33.2299	-2.41631	0	217.662	188.216	129.26	15.5298	25.2607	36.1455
NCU06586	AN1 zinc finger protein	8.22261	32.8025	1.99614	4.14e-06	8.448	7.55639	8.57288	20.5651	25.4823	32.8207
NCU04170	hypothetical protein	9.00707	32.5964	1.85558	6.44e-10	13.3795	11.4804	11.0207	17.46	43.4307	43.1783
NCU10529	hypothetical protein	14.369	32.5626	1.18025	6.54e-05	17.9204	17.6501	17.8128	22.1057	31.9339	38.3767
NCU03756	aromatic amino acid aminotransferase 1	9.68751	32.1638	1.73124	9.47e-08	9.90649	11.5372	12.3995	35.5101	25.5968	28.8547
NCU06156	hypothetical protein	80.2122	32.1221	-1.32026	0.00318499	86.2436	88.2862	74.5489	32.7052	31.331	28.135
NCU01873	hypothetical protein	3.91406	32.0255	3.03248	1.24e-12	4.15938	4.10496	4.38867	11.5786	36.6147	41.5111
NCU06949	subtilisin-like proteinase Mp1	13.4947	31.9207	1.2421	0.00079161	11.9553	15.6098	14.3688	13.8387	28.2339	37.4116
NCU06389	DUF625 domain-containing protein	15.8795	31.8699	1.00502	0.00105543	16.2525	17.3129	15.4248	16.4691	29.5339	38.2586
NCU06943	SIK1	15.7472	31.7146	1.01005	0.0029365	13.765	23.5804	20.3291	14.4323	37.8197	37.1578
NCU05548	phospho-2-dehydro-3-deoxyheptonate aldolase	15.137	31.669	1.06499	0.00209377	15.7925	19.7617	19.7224	32.8288	29.4719	30.576
NCU08164	retinol dehydrogenase 13	11.866	31.3973	1.40381	0.00195264	14.7232	14.4633	10.3335	30.7254	26.7406	31.254
NCU05196	mitochondrial DnaJ chaperone	12.0141	31.3889	1.38553	2.39e-05	13.0758	13.6871	14.07	19.0558	26.0505	33.539
NCU02305	decaprenyl-diphosphate synthase subunit 1	5.8997	31.1687	2.40139	1.19e-09	5.47671	7.04418	7.2722	19.804	29.8525	34.7332
NCU02059	endothiapepsin	10.2621	31.0715	1.59827	2.53e-06	15.6884	11.9225	14.4173	44.0958	29.3173	27.3332
NCU07307	fatty acid synthase beta subunit dehydratase	15.3035	31.0704	1.02168	0.0008491	15.3783	20.0183	21.4191	25.9205	39.3643	29.4753
NCU05842	hypothetical protein	1.47048	30.7739	4.38735	0	1.44815	1.70019	1.48513	6.44446	34.2789	42.2008
NCU10697	hypothetical protein	5.15403	30.7353	2.57612	5.58e-10	6.06179	6.14496	6.35361	32.0064	30.1315	31.6212
NCU03737	elongation factor Tu	15.2494	30.5227	1.00113	0.0085931	14.7859	25.1551	23.8381	17.6005	37.6298	39.1589
NCU00586	non-anchored cell wall protein 6	93.8639	30.4599	-1.62366	1.07e-09	108.839	110.587	117.367	29.2119	30.5115	31.5716
NCU04467	hypothetical protein	12.426	30.3312	1.28745	0.00433237	15.5232	11.6057	15.2047	22.6553	39.1108	33.2171
NCU06384	MFS sugar transporter	2.02547	30.0041	3.88883	0	2.11092	3.25099	2.72331	54.4998	19.9749	19.7351
NCU09281	alpha-glucosidase	131.445	29.8281	-2.13971	0	147.558	144.806	123.485	21.4521	31.3101	26.4949
NCU11933	hypothetical protein	3.29233	29.7724	3.17679	3.7e-11	3.63378	4.8516	3.82883	29.0572	31.4199	33.2252
NCU04106	hypothetical protein	114.306	29.7127	-1.94375	2.73e-13	137.858	145.857	127.661	35.435	28.8828	28.8428
NCU01180	ubiquitin C-terminal hydrolase	13.5569	29.5798	1.12559	0.000363889	14.2104	13.6207	14.7876	14.0308	29.0302	33.6539
NCU05524	hypothetical protein	12.085	29.5101	1.28799	4.01e-05	15.6737	13.6853	13.0037	13.4987	38.5498	36.6552
NCU02883	hypothetical protein	7.58467	29.4778	1.95847	7.17e-07	9.53976	9.00838	9.03149	23.6376	28.665	34.6432
NCU01211	hypothetical protein	13.033	29.4309	1.17516	0.00225759	14.9117	16.4178	14.4179	16.0336	27.0631	34.1689
NCU06334	hypothetical protein	95.1816	29.3124	-1.69917	1.35e-10	97.697	102.599	96.9229	27.1101	29.4553	24.1509
NCU11700	hypothetical protein	6.80479	29.3031	2.10643	2.8e-05	8.27364	8.571	7.63532	18.4394	39.8526	40.3289
NCU12104	hypothetical protein	5.4393	29.2346	2.42618	7.78e-08	8.87602	7.86699	4.49226	31.6417	36.4954	32.1159
NCU10270	hypothetical protein	9.13823	28.9645	1.6643	1.92e-05	10.0802	8.77243	7.75255	17.4569	24.6625	29.8039
NCU01769	hypothetical protein	13.5728	28.8928	1.08999	0.00388485	18.1721	15.6017	15.5062	16.2777	35.146	27.5951
NCU11501	hypothetical protein	11.8463	28.6998	1.27661	4.44e-05	12.7137	12.4315	14.5606	20.0275	26.7426	28.8378
NCU11307	CCC1	59.8959	28.5761	-1.06765	0.000489548	59.3284	61.2574	64.3488	24.6757	26.6171	20.3078
NCU04933	nucleoside-diphosphate-sugar epimerase	8.04753	28.5351	1.82612	0.000312438	13.3313	11.1027	9.03631	25.8106	37.4411	38.9192
NCU05582	ubiquitin fusion degradation protein	6.73087	28.5311	2.08367	2.53e-09	7.80259	8.28304	6.93262	15.9757	27.0786	36.0314
NCU00309	WSC domain-containing protein	11.882	28.5124	1.26281	6.1e-05	11.7479	13.3437	18.1449	17.5374	35.781	31.3843
NCU08557	hypothetical protein	103.561	28.443	-1.86434	0.000333516	110.373	154.871	131.184	24.7738	31.0005	31.9808
NCU07067	mannosyl-oligosaccharide alpha-1,2-mannosidase	87.6669	28.3058	-1.63093	4.33e-10	99.1189	108.098	93.0488	28.5478	24.9758	24.9645
NCU02630	heat shock protein 78	9.81496	27.9263	1.50857	8.1e-07	11.2949	11.2392	10.5684	19.4063	25.9141	28.5991
NCU07851	superoxide dismutase 1 copper chaperone	11.4196	27.912	1.28937	0.0004787	13.7889	11.0959	10.7119	17.5429	23.9533	28.6669
NCU02500	clock-controlled pheromone CCG-4	0.115247	27.8809	7.91841	0	0.0423754	0.0445266	0.35091	86.3484	0.205947	0.211196
NCU09785	hypothetical protein	8.30454	27.7592	1.741	2.46e-06	8.41386	9.91517	9.44798	13.4271	28.7771	28.8848
NCU09883	hypothetical protein	102.336	27.6739	-1.88671	3.1e-13	134.87	128.546	119.453	26.4812	29.6224	29.1477
NCU06153	monooxygenase	58.5728	27.6048	-1.08531	0.000141304	69.9988	54.7601	48.7293	15.8299	26.4303	22.037
NCU09336	hypothetical protein	12.0874	27.3029	1.17555	0.00538796	12.3406	15.0226	13.3199	14.9834	25.1862	33.4803
NCU05863	hypothetical protein	4.58936	27.1539	2.5648	3.67e-08	5.50536	4.84526	4.16585	45.7184	13.7313	20.3083
NCU07309	guanine deaminase	10.2006	27.0382	1.40635	0.000118127	13.6722	7.57281	8.05131	32.3904	18.1682	14.4066
NCU11964	hypothetical protein	9.12637	26.8733	1.55806	0.00717247	7.22723	8.92345	7.35114	21.973	22.5759	22.4193
NCU04656	MFS transporter	59.8171	26.8355	-1.15641	2.29e-05	63.1214	77.6159	71.8794	23.6558	33.6388	25.5314
NCU08480	HSF-type DNA-binding domain-containing protein	68.6596	26.8006	-1.3572	3.49e-07	89.1192	92.3288	79.0736	32.9644	29.8781	25.9458
NCU03673	hypothetical protein	8.77136	26.2055	1.579	0.000208454	9.64528	9.8033	9.55454	22.4239	25.3704	27.2788
NCU01059	glycosyl hydrolase family 47 protein	7.16317	26.1896	1.87033	5.78e-07	8.83837	8.42222	6.68805	29.0492	20.9946	24.132
NCU00322	hypothetical protein	52.4087	26.098	-1.00587	0.0072636	72.0455	85.6576	95.6289	35.38	38.6806	25.7963
NCU05555	hypothetical protein	11.1991	26.0258	1.21656	0.000191026	11.49	12.9986	10.4782	16.3797	23.9642	27.8277
NCU09522	hypothetical protein	11.3637	25.9544	1.19155	0.00651249	11.4377	16.1356	16.6328	21.6903	24.8967	30.6155
NCU04503	ribosome biogenesis protein Ssf2	12.1846	25.9291	1.08952	0.00240746	9.23113	12.5915	12.5941	13.4798	21.8951	21.4597
NCU08672	hypothetical protein	1.4522	25.704	4.14568	2.37e-09	1.88124	1.79975	1.04574	34.5546	27.1311	19.683
NCU08037	hypothetical protein	115.62	25.5651	-2.17714	6.2e-06	126.685	148.702	119.29	34.7541	26.6715	20.9547
NCU04854	endoglucanase EG-1	5.63712	25.4141	2.1726	1.31e-06	7.84487	6.77853	6.46699	32.5876	18.4587	23.5506
NCU02826	sodium/calcium exchanger protein	57.2781	25.3041	-1.17861	2.71e-05	76.0552	64.7237	63.1817	32.6828	22.0147	20.1321
NCU03398	hypothetical protein	63.8369	25.0645	-1.34875	7.71e-07	73.8828	74.5242	59.011	26.0755	25.1428	18.8072
NCU09291	FAD dependent sulfhydryl oxidase Erv2	11.7413	25.011	1.09097	0.0097153	11.2816	12.0747	12.6335	19.411	23.1653	22.9814
NCU07510	hypothetical protein	0.142815	24.9379	7.44805	1.55e-14	0.137835	0.247088	0.170657	42.9293	19.2621	22.137
NCU03181	acetylxylan esterase	3.23854	24.8435	2.93945	1.01e-10	4.2545	3.52768	3.73945	26.6648	26.6927	21.92
NCU06077	membrane transporter	3.00641	24.8107	3.04485	9.33e-13	3.85664	3.51424	3.16	13.0397	23.4	31.8435
NCU08176	pectate lyase A	3.62585	24.6311	2.76409	3.37e-08	4.48706	3.58501	6.10692	31.2102	17.9783	20.1518
NCU02724	HLH transcription factor	65.3923	24.5337	-1.41436	9.97e-07	90.5008	64.5641	71.2491	37.0559	19.9565	17.2008
NCU09272	hypothetical protein	151.76	24.4848	-2.63183	0	173.251	164.576	111.839	14.7906	22.3923	26.6633
NCU12083	hypothetical protein	4.16954	24.4811	2.55371	8.82e-09	3.89927	6.06041	6.19846	12.8988	26.6901	35.0013
NCU04983	lathosterol oxidase	10.1405	24.099	1.24884	0.00773016	10.5622	12.8806	13.1705	18.3512	27.8951	31.1131
NCU04614	60S ribosomal protein L19	49.0503	24.07	-1.02703	0.000288179	56.5332	56.9842	55.0922	26.8098	24.2877	17.9263
NCU07839	ATP-dependent RNA helicase dbp-2	10.2237	23.9116	1.22579	0.000216633	9.38464	16.7286	14.3247	12.7705	30.6255	32.3295
NCU01294	hydrolase	8.34323	23.8714	1.5166	1.86e-06	7.7244	9.4534	10.1209	10.4183	26.1351	30.4352
NCU06513	hypothetical protein	8.29066	23.8041	1.52165	0.000763879	10.7009	9.24688	10.0756	14.7971	26.5973	28.9357
NCU01926	hypothetical protein	3.64832	23.6983	2.69948	1.54e-09	5.2549	3.85515	4.42545	21.9016	27.696	29.5072
NCU08994	hypothetical protein	2.93077	23.6174	3.0105	1.56e-11	3.67596	2.81327	4.45938	14.5519	22.6686	25.5933
NCU04486	hypothetical protein	55.4071	23.1636	-1.25821	0.000786589	68.0507	71.619	65.5406	36.9118	18.4834	17.5882
NCU08507	zinc finger protein zpr1	7.27396	23.0116	1.66155	0.000423042	8.12152	9.4871	10.7726	8.91559	22.4108	32.0516
NCU03253	hypothetical protein	50.4554	22.9293	-1.13781	5e-05	64.6736	61.6239	61.2319	22.6897	24.7709	23.9752
NCU11851	hypothetical protein	89.4614	22.801	-1.97217	0.000735518	107.123	108.296	83.9387	21.7128	26.2871	21.9325
NCU01742	hypothetical protein	11.3378	22.7813	1.00671	0.00619585	11.9872	11.0492	8.5552	12.0442	18.6612	19.8047
NCU00633	hypothetical protein	10.0647	22.1355	1.13706	0.00822703	10.4286	10.9158	10.8101	21.5138	18.0518	18.5632
NCU07098	hypothetical protein	10.1447	21.8298	1.10557	0.00289201	9.29293	12.649	12.1118	7.79657	21.345	29.7251
NCU03682	endonuclease/exonuclease/phosphatase	9.65101	21.8058	1.17596	0.00935345	12.4744	11.0417	12.0049	17.6205	24.2344	27.2034
NCU00244	glycosyl transferase	101.905	21.761	-2.22741	0	94.0871	100.3	86.9809	17.6846	19.9032	18.5955
NCU00283	hypothetical protein	6.75315	21.7279	1.68591	8.11e-05	7.28875	8.06215	8.1693	18.7882	18.9031	21.2794
NCU02084	arginase	7.44945	21.7222	1.54396	0.00153704	6.40641	9.67509	10.0068	8.77811	24.691	26.3284
NCU01720	hypothetical protein	6.36297	21.6911	1.76933	4.86e-06	7.86927	7.69879	9.75466	16.8859	31.4853	26.6507
NCU04537	monosaccharide transporter	4.61095	21.6507	2.23128	6.73e-07	6.44544	6.4185	8.16284	31.9786	20.8087	21.5892
NCU07308	fatty acid synthase alpha subunit reductase	9.24541	21.4198	1.21214	2.62e-05	8.69287	11.5758	13.0956	16.3199	27.2286	19.9574
NCU11959	hypothetical protein	90.1985	21.2243	-2.08739	8.08e-12	110.913	105.548	93.4055	14.6007	30.7364	19.6433
NCU04774	hypothetical protein	4.58269	21.1211	2.20442	1.13e-08	5.54402	6.38379	6.04285	19.76	20.1935	29.7965
NCU06533	hypothetical protein	4.59296	21.1065	2.20019	7.83e-07	5.15029	6.22641	4.9883	11.0549	23.6009	25.4166
NCU00245	hypothetical protein	76.5057	21.0804	-1.85966	5.03e-09	72.4547	72.528	51.6283	14.234	16.9804	17.4317
NCU01063	hypothetical protein	64.074	21.0283	-1.60741	2.95e-06	75.9248	77.3781	64.2029	16.9326	18.9029	22.4283
NCU09354	hypothetical protein	9.32125	20.9013	1.165	0.00037138	7.71502	11.7299	10.6874	12.2482	21.3641	23.8639
NCU05822	hypothetical protein	4.0221	20.8447	2.37366	5.21e-08	4.57467	3.72172	3.2635	9.30277	22.273	18.7931
NCU06223	hypothetical protein	7.72934	20.4297	1.40225	0.00253998	12.5549	10.1976	10.0588	24.6709	23.4801	17.2937
NCU06306	hypothetical protein	77.0852	20.3612	-1.92063	1.42e-13	81.0924	83.7046	84.7601	20.064	20.0176	15.6392
NCU00306	MFS multidrug transporter	8.79751	20.2547	1.20309	0.00120004	9.64723	12.49	11.3905	22.7008	19.6288	21.174
NCU06991	hypothetical protein	4.68744	20.093	2.09982	3.36e-06	4.24337	6.82791	6.3164	18.1728	22.034	19.9631
NCU01983	hypothetical protein	4.86035	20.0185	2.0422	6.13e-06	5.37618	5.17414	5.64425	23.4411	13.7365	15.8184
NCU02882	hypothetical protein	4.58031	19.8288	2.11408	5.08e-06	4.48792	4.92531	4.6574	11.3784	18.9883	19.7323
NCU05639	hypothetical protein	64.3137	19.5493	-1.71801	1.63e-07	75.5396	69.0321	38.5905	7.67096	22.283	16.5877
NCU01196	hypothetical protein	5.04395	19.4971	1.95063	0.000182755	8.44846	5.69643	5.34267	18.9719	19.9828	16.4209
NCU03107	MFS transporter	41.5654	19.348	-1.1032	0.000187072	43.8328	49.9912	37.9481	17.4221	20.6255	14.9995
NCU07898	polysaccharide monooxygenase-3	3.59281	19.1421	2.41356	5.61e-06	3.69098	3.19689	5.3137	21.517	16.7001	15.1838
NCU10039	hypothetical protein	3.1551	19.1367	2.60059	5.77e-09	3.41899	3.34733	2.90142	23.0618	13.7634	16.5843
NCU03098	glycosyl hydrolase	101.817	19.0979	-2.4145	0	116.081	120.666	114.762	25.4097	16.0742	14.8822
NCU08594	hypothetical protein	8.93617	18.9194	1.08214	0.00375587	10.6514	10.1265	8.92538	14.1937	18.5156	19.6461
NCU07074	hypothetical protein	2.83444	18.8731	2.73519	6.33e-10	2.35296	2.89561	1.74507	5.98679	15.8217	15.8266
NCU01633	hexose transporter HXT13	6.78679	18.627	1.4566	0.00075549	7.00243	9.22076	12.4234	36.1761	12.563	12.6946
NCU01268	ubiquitin-conjugating enzyme E2 6	38.2229	18.4302	-1.05236	0.000946222	45.0158	43.6861	38.8224	20.8979	16.7083	14.6872
NCU09455	hypothetical protein	5.38975	18.2735	1.76146	0.00175292	11.0317	3.67051	4.05706	18.738	15.0839	14.8137
NCU09458	MFS transporter	6.48132	18.2181	1.49102	0.000837437	8.07814	8.78922	7.82611	14.5817	18.019	22.2578
NCU08900	FMN binding oxidoreductase	5.20424	18.1949	1.80577	0.000122131	4.32104	5.28701	4.8102	11.6844	12.1025	15.1784
NCU06669	hypothetical protein	2.53772	18.1014	2.83449	1.31e-11	2.2181	2.70154	2.53114	11.8362	16.5427	17.8796
NCU08898	homoaconitase	7.25575	17.9283	1.30504	0.000550311	8.3068	9.72242	10.1689	15.2381	18.8084	17.2218
NCU07055	monooxygenase	3.78468	17.5053	2.20955	2.15e-06	3.13727	4.20634	3.05792	10.8973	14.2843	17.0556
NCU06566	hypothetical protein	47.8994	17.2164	-1.47622	2.13e-08	57.6786	49.8247	41.4394	14.0195	16.5687	14.7972
NCU10052	hypothetical protein	4.08422	17.1647	2.07131	1.6e-06	5.65336	4.8498	4.37963	4.73762	17.1444	30.2307
NCU08756	hypothetical protein	2.33189	17.1359	2.87745	4.22e-10	3.02051	2.47273	2.50044	25.2612	11.8179	12.9718
NCU02608	hypothetical protein	36.6028	17.0611	-1.10124	0.00397163	38.0686	42.6919	37.617	14.4097	14.8813	14.5953
NCU02854	hypothetical protein	3.38055	17.0345	2.33313	6.97e-06	3.86934	2.86883	1.83229	9.23383	13.8597	20.3344
NCU08770	hypothetical protein	117.385	16.961	-2.79095	0	140.831	117.222	127.703	18.8102	16.5581	12.4213
NCU07718	hypothetical protein	80.9984	16.9324	-2.25811	0	95.3672	110.545	83.8274	12.2788	21.1844	17.8771
NCU02625	hypothetical protein	6.76255	16.9007	1.32145	0.0038357	8.77325	7.64173	8.72265	17.1597	15.1265	16.4376
NCU09520	hypothetical protein	35.8012	16.7112	-1.09919	8.31e-05	33.2424	41.9573	33.4333	17.0081	14.3251	13.3677
NCU01189	hypothetical protein	34.3455	16.6898	-1.04115	0.00024244	41.043	35.7474	31.9269	18.5081	16.3799	12.4464
NCU09335	hypothetical protein	62.6611	16.5206	-1.9233	1.87e-12	75.0097	74.5872	67.8065	12.4787	18.3858	13.5331
NCU10009	ATP-binding cassette transporter	6.73093	16.3714	1.2823	1.81e-05	8.72286	8.33445	8.55213	18.3484	15.036	18.209
NCU08113	hypothetical protein	1.62814	16.1852	3.31337	3.17e-09	1.4473	1.64015	1.50533	17.3712	10.958	12.4151
NCU04168	hypothetical protein	5.15566	16.1344	1.64591	0.000294985	5.05301	5.81886	5.76325	6.73035	18.5306	16.0674
NCU09838	hypothetical protein	6.0717	16.0513	1.40252	0.00597545	6.59678	7.45498	5.62942	12.6621	15.5992	16.797
NCU02046	hypothetical protein	32.4676	15.9841	-1.02236	0.000797428	40.1346	40.3426	39.8738	9.09392	22.4076	17.5706
NCU07339	hypothetical protein	2.01954	15.9809	2.98425	1.75e-08	2.65573	1.92485	2.49076	17.4049	13.6246	14.0643
NCU08063	hypothetical protein	6.15384	15.928	1.372	0.000349095	7.56329	7.62689	6.29136	7.0374	16.0437	18.9666
NCU00574	hypothetical protein	3.4685	15.8861	2.19538	0.000735715	4.84621	5.64649	2.83128	18.22	15.139	15.6851
NCU04292	branched-chain-amino-acid aminotransferase	5.48489	15.836	1.52967	0.00469285	11.8394	5.04522	8.01613	13.8529	21.0817	19.5127
NCU04866	hypothetical protein	75.4423	15.744	-2.26057	0	112.161	93.1134	72.749	14.4131	16.7687	14.5809
NCU00007	pH-response regulator protein palH/rim-21	37.1247	15.3604	-1.27316	5.92e-06	43.2903	40.0078	37.8596	15.1156	13.8143	12.3263
NCU07760	endoglucanase IV	4.20353	15.2321	1.85744	0.000508402	5.31638	6.40606	9.51916	16.0545	19.1143	15.1439
NCU06382	ABC transporter	5.01249	15.1567	1.59636	1.1e-06	7.26436	4.76748	4.61887	7.3454	14.3728	21.0219
NCU08980	alternative NADH-dehydrogenase	6.62889	15.0033	1.17844	0.00675979	6.76869	9.47937	9.04578	13.6055	14.4151	17.4216
NCU08790	hypothetical protein	1.51115	15.0006	3.31131	8.02e-12	2.15339	2.36499	1.83081	21.9054	12.5463	15.7621
NCU03208	hypothetical protein	1.05407	14.8277	3.81425	5.9e-13	0.876236	0.798616	1.28667	3.05917	14.2098	22.4252
NCU11464	hypothetical protein	51.0311	14.8027	-1.78551	4.62e-06	73.6219	60.2694	44.8608	19.2711	16.223	13.2267
NCU01089	flavin-containing amine oxidasedehydrogenase	37.3303	14.798	-1.33494	1.93e-05	41.4691	44.6901	43.0353	14.1072	15.532	13.1742
NCU07498	DNA excision repair protein Rad2	30.2231	14.6808	-1.04172	0.000186124	28.1614	28.3883	24.3422	13.6941	11.9971	10.2135
NCU08156	hypothetical protein	39.019	14.632	-1.41506	4.31e-05	41.8612	43.2875	28.6551	9.2519	14.0281	15.1461
NCU03963	5'-methylthioadenosine phosphorylase	2.68333	14.496	2.43356	1.91e-06	2.20041	3.41787	3.33154	9.72071	12.1608	15.5968
NCU06537	hypothetical protein	4.41731	14.4041	1.70524	0.000142139	5.27039	5.54357	4.13014	6.28739	18.5527	18.9032
NCU03552	hypothetical protein	4.96134	14.24	1.52115	0.00145072	8.9825	5.46621	6.20612	16.9182	16.1449	17.7092
NCU08487	hypothetical protein	43.0696	14.1453	-1.60635	6.61e-10	50.7638	50.8888	41.5949	13.4744	14.4422	12.3443
NCU08899	hypothetical protein	6.85169	14.0705	1.03814	0.00482315	8.34337	7.95716	7.7114	16.6632	13.6455	10.4749
NCU05448	hypothetical protein	4.08625	14.0492	1.78163	0.00121885	5.09843	4.94577	4.06321	11.8655	14.0699	17.4671
NCU07668	MFS multidrug transporter	4.55714	13.8527	1.60397	0.000142129	5.43281	5.24197	5.88447	14.6193	12.924	13.9258
NCU04515	hypothetical protein	2.37933	13.684	2.52386	0.000581802	2.43988	4.59087	1.84545	3.93724	13.3862	22.0065
NCU07876	PH domain-containing protein	28.7591	13.6248	-1.07778	0.00396239	38.4168	32.144	32.0082	20.1058	11.1941	9.00659
NCU02672	hypothetical protein	1.75223	13.4196	2.93708	1.13e-05	2.95223	1.90395	1.87022	8.92142	14.33	16.4915
NCU01868	MFS maltose permease MalP	35.4998	13.414	-1.40408	9.28e-06	36.2612	39.3492	31.2237	10.9341	13.3912	12.9229
NCU01862	SWIRM domain-containing protein FUN19	49.6349	13.2581	-1.90448	5.84e-12	72.9129	58.0778	53.7417	14.6407	14.2164	14.367
NCU01529	hypothetical protein	2.22395	13.1853	2.56773	0.000110252	2.56234	2.23734	2.17018	5.36437	11.5582	15.1166
NCU07768	short-chain dehydrogenase/reductase SDR	1.22091	13.1619	3.43034	1.34e-11	1.01075	1.47485	1.24385	9.25276	12.6292	12.632
NCU04474	sulfite oxidase	34.3998	13.1514	-1.38719	2.43e-05	37.0513	42.3008	35.7211	12.6338	12.4128	11.2974
NCU01872	hypothetical protein	2.96478	12.8958	2.1209	0.0003647	3.82484	3.29753	2.15427	10.5087	9.76905	11.7972
NCU06328	hypothetical protein	26.7481	12.7546	-1.06842	0.00360982	17.7931	29.4132	24.718	3.12768	14.301	13.9651
NCU05826	hypothetical protein	3.39962	12.7023	1.90165	2.62e-05	5.46328	3.10645	2.91113	6.6319	12.6126	15.172
NCU07487	periplasmic beta-glucosidase	1.26608	12.6745	3.32349	3.48e-13	1.53816	1.53502	1.17524	19.3249	7.2707	9.37633
NCU04851	hypothetical protein	28.7086	12.4553	-1.20472	1.42e-05	35.2739	28.5176	27.2418	12.7319	12.1214	8.64984
NCU11665	hypothetical protein	1.52539	12.1131	2.98933	2.72e-07	2.09538	1.62112	2.02472	8.58058	16.3442	15.9795
NCU12016	hypothetical protein	29.3959	12.0859	-1.28229	0.000343309	39.1047	34.2814	31.2002	14.5651	13.2305	10.0225
NCU00716	non-anchored cell wall protein 5	3.94671	12.0815	1.61408	0.00996886	4.13047	4.74777	5.22951	1.56583	14.1701	19.4735
NCU04374	MFS transporter	35.32	11.9828	-1.55952	1.12e-06	44.8047	49.3397	32.3834	9.84035	14.2469	13.1844
NCU05722	hypothetical protein	2.64025	11.829	2.16358	1.11e-05	2.43009	2.73797	2.01801	5.15329	9.66139	11.506
NCU12049	hypothetical protein	1.51787	11.5289	2.92513	7.46e-05	0.954485	1.75374	1.34439	11.0891	10.3272	6.51068
NCU09196	hypothetical protein	24.174	11.4858	-1.07361	0.000538333	28.6857	27.4862	22.9996	11.6128	12.7106	10.0395
NCU09416	cellulose-binding GDSL lipase/acylhydrolase	0.206946	11.4288	5.78728	0	0.269715	0.234272	0.314603	11.3659	13.1049	11.4148
NCU04986	hypothetical protein	23.5707	11.2823	-1.06294	0.001027	25.7454	26.5336	24.3758	11.2528	11.15	8.9859
NCU08738	MFS peptide transporter	4.61154	11.2436	1.28579	0.00850546	5.41349	6.40175	7.91717	18.5496	9.22864	10.2128
NCU07235	hypothetical protein	1.47297	11.0963	2.91328	9.38e-10	1.53376	1.43305	1.51717	6.39226	11.3655	10.0601
NCU01916	mitochondrial carrier protein RIM2	1.37817	10.9984	2.99647	3.37e-08	0.888042	1.73903	1.89306	1.15336	9.9786	12.7069
NCU06782	zinc metalloproteinase	3.50182	10.996	1.6508	0.00161057	3.77602	3.31699	3.49485	8.14827	9.23506	10.4544
NCU09906	hypothetical protein	4.47147	10.9232	1.28857	0.00216513	5.07086	5.41282	4.85462	7.22785	13.0355	11.6281
NCU08726	hypothetical protein	51.7239	10.8754	-2.24976	0	69.5355	65.5865	54.7936	14.1022	11.4043	8.60428
NCU08720	hypothetical protein	2.46693	10.8499	2.1369	0.000143336	3.0736	2.56594	3.4325	4.93841	12.5983	16.4065
NCU01861	short chain dehydrogenase/reductase family	26.2885	10.7783	-1.28629	0.000839843	28.3196	28.9752	32.4982	16.2783	8.09643	6.89088
NCU11574	hypothetical protein	2.29808	10.7319	2.2234	0.000121583	2.7107	2.68503	2.42927	6.9672	12.655	13.6344
NCU07684	hypothetical protein	23.6526	10.551	-1.16462	0.000456438	27.9396	26.3759	26.1834	11.8475	9.72306	8.27138
NCU07519	PIF1	21.1927	10.4757	-1.01652	0.00252082	24.9042	23.2176	21.3137	12.0962	9.87697	8.60745
NCU03863	hypothetical protein	23.7569	10.3062	-1.20484	0.00210754	24.2839	27.6223	39.9139	8.88453	14.6526	9.89395
NCU07474	ergot alkaloid biosynthetic protein A	23.131	10.2553	-1.17346	0.00308741	25.5633	27.9925	26.016	10.0986	9.29495	8.95923
NCU09685	hypothetical protein	53.3463	10.1706	-2.39099	9.67e-07	72.8993	82.3706	53.8204	13.5852	10.7745	9.05668
NCU01493	hypothetical protein	25.5356	10.0507	-1.34521	0.0010822	31.8748	35.0523	28.851	12.1328	9.52869	8.17439
NCU06534	hypothetical protein	20.3891	9.9974	-1.02817	0.000428293	26.6495	23.0447	22.7941	13.9752	9.42365	6.77943
NCU05980	carboxypeptidase S1	2.77163	9.97957	1.84824	0.000800146	3.39439	3.72744	2.7816	27.2192	1.8574	1.65113
NCU04006	hypothetical protein	1.41076	9.97276	2.82152	7.54e-08	1.38311	1.40213	1.51069	2.82419	9.45905	11.8337
NCU02355	hypothetical protein	33.8743	9.96083	-1.76586	9.06e-09	41.3793	39.5826	37.5197	14.847	8.32543	6.19176
NCU04424	hypothetical protein	3.33506	9.73998	1.5462	0.00493394	4.35546	3.18862	3.68564	9.98238	10.6231	9.33726
NCU03444	hypothetical protein	20.0095	8.94748	-1.16113	0.00103402	21.0743	20.1715	17.4948	10.872	8.53177	6.6025
NCU07434	short-chain dehydrogenase/reductase SDR	59.7941	8.75598	-2.77166	0	81.1572	93.5539	79.7891	11.9545	9.70682	7.89404
NCU07837	DNA repair protein Rhp26/Rad26	19.41	8.70253	-1.15729	0.000114999	20.2946	21.0288	19.9928	6.79953	8.96712	7.28852
NCU00710	acetyl xylan esterase	1.24997	8.69855	2.79888	2.44e-07	1.69349	1.65386	1.85415	17.873	4.32229	5.82571
NCU09734	hypothetical protein	125.518	8.57194	-3.87213	0	224.185	166.231	112.872	7.2203	9.88666	10.06
NCU07564	siderophore iron transporter mirC	18.1724	8.45701	-1.10353	0.0032338	20.9787	18.3994	14.82	8.53317	6.95769	7.09115
NCU07222	hypothetical protein	0.595191	8.39353	3.81785	4.38e-13	0.466203	0.734075	0.589596	4.77613	7.10592	10.9074
NCU02990	hypothetical protein	16.9416	8.29508	-1.03024	0.00997516	19.5055	19.1343	17.9936	10.409	8.69751	6.5883
NCU01870	Eno3 protein	0.235156	8.26981	5.13616	0	0.27051	0.194115	0.24037	0.865476	8.39065	9.20032
NCU01923	hypothetical protein	1.00168	8.23329	3.03905	0.00524214	1.09604	2.31395	0	4.85524	8.29078	9.03807
NCU04269	aspartyl proteinase	2.45588	8.22299	1.74342	0.0010169	2.74584	3.00443	2.87971	4.83924	8.96075	10.0129
NCU01136	hypothetical protein	2.61601	8.17296	1.64349	0.00463248	3.61616	3.07257	4.64761	7.58576	10.1566	10.7222
NCU00886	hypothetical protein	1.94332	7.88418	2.02043	0.000253865	2.69201	2.0983	2.06758	5.32466	9.39437	8.09795
NCU01840	hypothetical protein	16.0122	7.80412	-1.03687	0.00387661	19.8825	16.9068	15.502	9.85721	6.27244	5.74634
NCU09664	acetylxylan esterase	0.577143	7.78814	3.75428	8.7e-09	0.334363	0.446396	0.953244	7.08497	5.09463	6.95244
NCU05819	DUF1237 domain-containing protein	58.5356	7.59617	-2.94597	0	88.8029	78.1517	64.8252	8.0308	8.37977	7.66717
NCU04867	hypothetical protein	0.146015	7.52354	5.68723	2.42e-10	0.329276	0.20347	0.0569209	23.7021	0.081232	0
NCU07942	hypothetical protein	2.44437	7.50736	1.61885	0.00911828	1.83007	2.44552	2.66882	1.71765	6.69152	7.83842
NCU08043	hypothetical protein	1.3636	7.48026	2.45566	0.000735715	0.984254	1.61954	1.37603	9.32845	4.69388	5.89671
NCU00246	hypothetical protein	22.3311	7.43894	-1.58589	1.23e-05	24.0866	24.4262	22.0106	6.63077	7.28522	7.99749
NCU07350	hypothetical protein	0.700208	7.43067	3.40764	4.78e-09	0.857839	0.89085	0.958089	0.90669	10.3841	12.8291
NCU06252	hypothetical protein	16.0086	7.27629	-1.13757	0.0019738	15.8368	17.8195	20.2458	6.3912	7.69102	7.06305
NCU11920	hypothetical protein	0.451411	7.16854	3.98917	2.19e-10	0.384233	0.5209	0.788779	8.37143	7.67665	7.35109
NCU01058	hypothetical protein	2.42451	7.14148	1.55853	0.00506204	3.1972	2.75591	2.71354	9.01242	6.25008	6.10361
NCU02627	hypothetical protein, variant	2.39043	7.13951	1.57855	0.00794518	1.94963	2.93862	2.99818	4.54654	7.74231	8.15301
NCU02627	hypothetical protein, variant	2.39043	7.13951	1.57855	0.00794518	1.94963	2.93862	2.99818	4.54654	7.74231	8.15301
NCU04881	hypothetical protein	15.3382	7.13007	-1.10514	0.000528283	19.1276	16.3408	14.6892	7.01777	7.84143	5.82332
NCU07476	hypothetical protein	18.6832	6.84638	-1.44833	3.16e-05	19.5985	17.7911	14.8052	6.07621	5.14075	4.64793
NCU05751	cellulose-binding protein	2.0928	6.84626	1.70988	0.00944596	1.32091	1.82747	2.96677	9.21397	4.12052	4.83268
NCU09415	hypothetical protein	1.68857	6.82123	2.01423	0.000205668	1.69204	1.86567	1.60661	4.61861	7.97437	5.78859
NCU08746	starch binding domain-containing protein	1.08236	6.81106	2.6537	1.91e-06	1.16557	1.63181	1.84721	6.28887	8.17058	7.03403
NCU04861	hypothetical protein	19.4412	6.8045	-1.51455	1.11e-05	25.6014	24.0754	21.4506	8.75016	5.76838	5.14422
NCU06607	hypothetical protein	2.27036	6.7006	1.56137	0.00404933	2.2807	2.29044	3.21193	6.14872	5.88903	5.01465
NCU05851	4-coumarate-CoA ligase 1	19.0619	6.6811	-1.51253	4.77e-05	21.6296	18.6803	17.3585	6.36094	5.23185	4.88036
NCU05061	hypothetical protein	20.5874	6.56462	-1.64898	0.000207705	24.6924	30.1634	22.0797	9.44616	7.31338	4.32225
NCU07224	monooxygenase	0.0525344	6.53777	6.95939	0	0.0340536	0.0246799	0.0535342	4.52672	4.5083	5.96156
NCU11746	hypothetical protein	1.18081	6.493	2.4591	0.00037138	1.16276	1.90163	2.2175	2.73376	6.1192	11.3486
NCU10091	hypothetical protein	1.80938	6.33276	1.80734	0.000895604	1.70732	2.18013	1.86676	3.93807	6.9407	7.03136
NCU08537	hypothetical protein	13.0429	6.3204	-1.04518	0.00261167	15.3548	15.1311	13.5493	7.04712	6.61832	5.34782
NCU05239	chitin synthase A	14.7515	6.24063	-1.2411	6.45e-05	18.7756	17.9602	14.6425	5.98893	6.78556	4.80655
NCU09323	hypothetical protein	0.3994	6.22198	3.96147	7.76e-05	0.71775	0.601913	0	3.22669	6.11014	6.72013
NCU06120	hypothetical protein	1.78282	6.16568	1.7901	0.00419417	1.91755	2.19482	1.89263	3.3234	6.26024	7.0899
NCU00290	ABC transporter	33.3258	6.10724	-2.44805	1.24e-12	49.1543	36.2231	27.2901	1.91946	7.88397	7.43626
NCU05229	hypothetical protein	19.0053	6.09474	-1.64076	9.31e-05	26.0878	30.823	25.6653	6.41534	8.82178	6.59994
NCU01135	hypothetical protein	14.0165	6.04052	-1.21438	0.000709318	14.0512	13.016	11.6506	4.98236	5.04982	4.6158
NCU08447	hypothetical protein	20.1931	5.76438	-1.80862	5.31e-06	14.7166	22.0603	24.6437	2.72539	8.1204	4.80924
NCU08880	neutral amino acid permease	12.5003	5.60869	-1.15622	0.00875925	14.9621	16.7103	14.8481	4.19453	7.46635	6.25248
NCU03049	flavin-binding monooxygenase	16.9906	5.56598	-1.61003	2.78e-05	18.8221	18.2903	13.7246	6.02475	4.74549	4.36108
NCU07948	hypothetical protein	14.121	5.42021	-1.38142	0.00431462	20.0631	20.1796	13.6818	4.4574	5.50566	6.61923
NCU00755	hypothetical protein	47.2437	5.39178	-3.13129	0	64.9496	54.5387	45.9511	4.23407	6.27585	5.54262
NCU05767	PRO1A C6 Zink-finger protein	16.7548	5.23122	-1.67936	1.22e-05	20.7085	22.7088	14.6897	3.05872	6.7212	5.76832
NCU05597	ascus development protein 3	12.9318	5.231	-1.30576	0.00562772	15.4154	16.9006	14.9046	3.86298	6.7637	5.05447
NCU04941	hypothetical protein	15.8823	5.17718	-1.61719	2.04e-05	19.2953	17.0763	16.6396	5.94211	4.68726	4.28003
NCU03354	hypothetical protein	13.3492	5.13241	-1.37905	7.84e-05	16.4748	14.4191	12.5852	6.29575	5.03603	3.97978
NCU00763	hypothetical protein	0.109808	5.06012	5.52612	0	0.130668	0.0966091	0.106877	3.52971	4.08229	4.4791
NCU01076	hypothetical protein	1.08255	5.03785	2.21837	0.00872035	0.295429	0.575589	3.50481	5.52896	4.5045	4.65861
NCU06427	hypothetical protein	21.472	4.82983	-2.15241	0.00276261	8.89041	8.9595	34.4878	0.796622	6.02025	6.17292
NCU05581	hypothetical protein	15.7924	4.81851	-1.71257	5.38e-05	22.2996	18.6687	15.6249	6.29442	4.3583	3.38825
NCU01109	hypothetical protein	17.089	4.68399	-1.86726	0.000391596	21.0363	18.5379	17.5276	6.108	3.69398	3.55851
NCU04874	alternative oxidase	0.381535	4.66518	3.61204	5.46e-08	0.828971	0.327496	0.3592	1.72976	5.90413	7.42696
NCU07617	Acr1	20.1826	4.50803	-2.16254	1.11e-09	27.0226	26.1094	18.0177	6.12047	3.60598	3.38047
NCU09968	hypothetical protein	0	4.46387	1.79769e+308	0.000528283	0	0	0	14.1154	0	0.00631905
NCU09424	hypothetical protein	0.603814	4.35845	2.85164	2.6e-07	0.791812	0.678151	0.679894	4.58053	3.18325	4.07946
NCU01260	hypothetical protein	8.85216	4.14709	-1.09393	0.000367605	9.65504	9.70341	9.15566	3.18128	4.70275	3.56083
NCU04568	pantothenate transporter liz1	12.4729	4.07043	-1.61555	0.000445037	14.9235	15.2835	14.7443	6.24529	3.07921	2.99372
NCU08867	hypothetical protein	0.926735	3.98874	2.1057	0.000242188	0.669365	0.793194	0.898723	2.92499	3.84427	4.0071
NCU07269	alpha-1,2-mannosidase	15.4905	3.96031	-1.9677	6.98e-08	20.0959	17.4783	15.4471	6.09213	3.12753	2.60718
NCU09049	hypothetical protein	27.9065	3.91851	-2.83222	2.97e-12	36.1708	34.0715	36.3507	5.94238	4.02194	2.64516
NCU01880	hypothetical protein	10.2415	3.89776	-1.39371	0.00776772	14.3113	12.6889	12.2425	4.81804	4.31591	3.15983
NCU11483	hypothetical protein	0.450205	3.77386	3.06738	5.99e-06	0.24909	0.556784	0.477091	1.73644	2.96571	5.30651
NCU07316	hypothetical protein	1.00696	3.70548	1.87965	0.00265653	0.790037	1.11164	0.821538	2.24885	3.01935	4.19665
NCU07547	60S acidic ribosomal protein P0	1.02817	3.67837	1.83899	0.00445778	0.838626	1.48804	1.08598	1.26008	4.08489	4.46637
NCU00960	hypothetical protein	0.610515	3.60795	2.56308	0.000572422	0.734382	0.711155	0.972332	2.98235	4.22076	3.86278
NCU06618	metallopeptidase MepB	1.0246	3.59937	1.81268	0.0007654	1.50378	0.9691	0.938574	4.12848	3.44718	3.11463
NCU12090	hypothetical protein	10.7612	3.58229	-1.58688	0.000429168	14.2272	11.5891	10.2159	4.86873	3.82336	2.42179
NCU11695	hypothetical protein	0.86247	3.52453	2.03088	0.00510757	0.862393	1.14301	1.1447	2.81074	3.37507	4.78686
NCU05870	hypothetical protein	9.66281	3.49378	-1.46765	0.00221524	10.8615	10.3287	9.7819	3.69311	3.61974	2.39456
NCU04539	L-lactate dehydrogenase	9.80865	3.48282	-1.4938	0.00241834	8.19403	9.43668	7.79147	2.38676	2.546	2.49676
NCU08987	hypothetical protein	0.72843	3.2416	2.15385	0.00653703	0.595342	0.814327	0.45896	2.13862	2.4514	2.804
NCU09165	hypothetical protein	0.8898	3.21648	1.85393	0.00282549	0.970409	1.33339	1.21926	4.21699	2.77813	2.86161
NCU04341	hypothetical protein	6.85954	3.00785	-1.18938	0.00788654	9.25199	8.30095	7.11735	3.06948	2.75766	3.60412
NCU08087	hypothetical protein	0.630538	2.8273	2.16477	0.00446814	1.06652	0.755444	0.466459	0.460984	3.38847	3.49054
NCU11463	hypothetical protein	0.337222	2.80875	3.05816	5.31e-05	0.339295	0.246214	0.488895	2.53861	2.75416	3.12097
NCU11295	hypothetical protein	0.492359	2.71846	2.46501	0.000141304	0.573907	0.373276	0.433987	0.485092	2.78852	2.83086
NCU00761	triacylglycerol lipase	0.591253	2.65283	2.16568	0.00037138	0.635876	0.695946	0.750136	1.5371	2.62705	3.05233
NCU04351	hypothetical protein	0.211781	2.57536	3.60413	0.00206466	0.214468	0.464036	0	0.364249	2.4997	3.63126
NCU05557	hypothetical protein	0.591532	2.55268	2.10948	0.000250562	0.53361	0.568565	0.565087	0.432887	2.49098	3.37972
NCU10429	hypothetical protein	9.93558	2.50378	-1.98849	0.00812458	10.7667	10.9658	10.0195	3.81264	1.93129	1.3668
NCU02575	hypothetical protein	0.487251	2.49631	2.35706	0.00875925	0.487093	0.626947	0.663129	1.57639	2.54815	3.17463
NCU02969	alkaline ceramidase	7.24641	2.48761	-1.54251	0.00842857	9.44796	8.77858	6.92585	2.73147	2.66265	2.55073
NCU00697	hypothetical protein	0.457769	2.47496	2.43471	0.000110966	0.374653	0.71771	0.399694	1.6757	2.92532	2.33455
NCU07609	MFS transporter	9.86685	2.37332	-2.05568	5.61e-06	11.2393	12.1986	9.67767	2.41764	2.2285	1.91275
NCU00705	hypothetical protein	10.3751	2.30597	-2.16968	0.000282117	13.2231	14.013	13.2037	2.55767	3.13376	1.23144
NCU09445	Cip2	0.196737	2.25999	3.52197	2.06e-06	0.179632	0.362455	0.20029	1.16899	2.25447	2.58144
NCU00871	hypothetical protein	0.375784	2.16452	2.52607	0.000519312	0.437923	0.480861	0.412215	1.44224	2.18423	2.52684
NCU04233	hypothetical protein	5.96745	2.14559	-1.47574	0.00684119	7.35487	6.93848	6.0203	2.7747	1.83084	1.51999
NCU02849	hypothetical protein	8.01601	2.11687	-1.92095	0.000128959	6.72796	9.05779	7.03596	1.98046	1.58392	1.68097
NCU01530	hypothetical protein	0.33172	1.97883	2.57661	0.00257327	0.226193	0.420647	0.3297	1.66303	2.48108	1.30673
NCU11768	hypothetical protein	0.49678	1.94593	1.96978	0.0056812	0.719671	0.612342	0.554692	1.30926	2.7234	1.99139
NCU08849	hypothetical protein	0.19193	1.93696	3.33514	5.98e-05	0.178765	0.14953	0.200864	1.09207	1.6047	1.82049
NCU11331	hypothetical protein	0.433691	1.85561	2.09715	0.00586636	0.374012	0.61778	0.450921	0.988857	2.40329	2.12866
NCU03562	hypothetical protein	0.568365	1.78421	1.65039	0.00513086	0.775065	0.604204	0.786642	1.80773	2.0407	1.62875
NCU01608	hypothetical protein	6.92985	1.78165	-1.95961	9.31e-05	9.66147	8.19552	6.68742	2.00035	1.97872	1.41351
NCU04697	cyanide hydratase	0.327086	1.75203	2.42128	0.00057806	0.497054	0.271362	0.482088	1.13982	1.54127	2.09376
NCU07527	hypothetical protein	5.0787	1.68319	-1.59326	0.00387958	6.20167	5.84939	5.6487	2.0554	2.02755	1.21204
NCU08383	hypothetical protein	0.278069	1.6826	2.59718	0.000282257	0.390028	0.2263	0.334813	1.91358	1.46037	1.4734
NCU04557	hypothetical protein	0.319609	1.61422	2.33646	0.000115909	0.355807	0.326404	0.282518	1.27915	1.48949	1.42027
NCU00848	integral membrane protein TmpA	19.3097	1.58031	-3.61105	0	34.8937	30.2134	19.8903	1.37334	2.03443	2.25745
NCU08152	high affinity glucose transporter	8.09693	1.54917	-2.38588	3.79e-08	13.4872	11.0547	7.68551	1.36085	2.50857	1.50385
NCU09506	hypothetical protein	0.234889	1.51301	2.68737	0.00086232	0.228685	0.128137	0.302963	0.847414	1.67994	1.3083
NCU05056	hypothetical protein	0.0771409	1.45381	4.2362	1.19e-07	0.119419	0.0317413	0.083664	1.93368	0.934231	1.23233
NCU10621	hypothetical protein	0.12336	1.44665	3.55177	0.00213916	0.212171	0.122452	0.0558757	0.756909	1.06739	1.75269
NCU06137	cytochrome P450 55A2	0.0556341	1.40146	4.65482	2.19e-07	0.0801341	0.0911857	0.0239252	0.945456	1.43179	1.56939
NCU04478	phospholipase D active site-containing protein	3.89685	1.32412	-1.55728	0.00673508	4.19501	4.51748	3.38142	1.21459	1.42721	1.06781
NCU05084	hypothetical protein	7.08736	1.29978	-2.44698	0.00348817	7.28326	9.55061	10.7613	1.29878	1.95977	0.707035
NCU05848	cytochrome P450 monooxygenase	0.0260801	1.24021	5.57149	9.34e-06	0.0413708	0.0197618	0.0224924	1.26047	0.684712	1.09223
NCU03584	polyketide synthase	0.414362	1.23431	1.57474	0.00924466	0.595188	0.402817	0.454785	0.386478	2.01177	1.1364
NCU09969	hypothetical protein	0	1.20147	1.79769e+308	0.00733948	0	0	0	3.79526	0	0
NCU04126	hypothetical protein	5.01852	1.17777	-2.09121	0.00213179	5.0382	5.81218	4.19323	1.45736	0.836325	1.01092
NCU05818	phosphatidyl synthase	18.5949	1.16908	-3.99146	0	21.1393	19.3043	15.2815	1.05356	0.920689	0.774223
NCU05580	membrane transporter	0.259165	1.12673	2.1202	0.0045862	0.358206	0.436723	0.329901	1.38937	1.44876	0.994162
NCU02061	hypothetical protein	0.0503091	1.08983	4.43714	0.0033454	0.0274959	0.0797199	0.0358114	3.15666	0.0617236	0.139055
NCU04939	hypothetical protein	4.06389	1.07004	-1.9252	0.00246081	5.4216	5.34788	4.21815	1.26932	1.06355	1.0085
NCU01049	hypothetical protein	0.0350661	1.05159	4.90635	4.67e-05	0.0166977	0.0481089	0.0408295	0.59399	0.893423	1.42071
NCU02918	polyketide synthase 6	0.294831	1.01391	1.78197	0.00225455	0.411336	0.446513	0.350026	0.865191	1.29232	0.989906
NCU01572	WD domain-containing protein	2.8954	0.977108	-1.56717	0.0065396	3.39914	3.14148	3.13733	1.08713	0.917554	0.75265
NCU03011	hypothetical protein	8.10009	0.815906	-3.31146	2.79e-11	9.75064	9.4926	5.77005	0.334536	0.77924	1.0244
NCU09232	hypothetical protein	3.03478	0.809105	-1.90719	0.0026736	3.86412	3.58395	2.64127	0.731412	0.655067	0.608442
NCU05189	hypothetical protein	4.17838	0.700393	-2.57671	6.45e-05	3.72387	5.26946	2.82921	0.205935	0.744384	0.661365
NCU02326	hypothetical protein	2.84818	0.623252	-2.19215	0.00108523	3.85503	4.39594	3.37981	1.00683	0.632573	0.45925
NCU07766	hypothetical protein	2.48231	0.429489	-2.53099	4.55e-05	2.96221	2.74949	2.18134	0.451067	0.40216	0.411077
NCU09342	hypothetical protein	2.63606	0.351321	-2.90752	0.000249119	3.10805	3.17468	3.01194	0.485391	0.242178	0.338967
NCU08128	benzoate 4-monooxygenase cytochrome P450	1.45025	0.215567	-2.7501	0.000146184	1.82109	1.22234	1.16909	0.214595	0.233532	0.100405
NCU09796	integral membrane protein	1.03044	0.0919898	-3.48564	0.00485456	1.17766	1.36964	1.50976	0	0.0899326	0.211991

## Sheet: cluster_237 genes
NCU	Annotation	Pfam Domains	CAZy	CBMs	signal P (site)	Symbol	FunCatId	FunCatName
NCU00206	cellobiose dehydrogenase CDH-1	GMC_oxred_C, GMC_oxred_N, CBM_1	CBM1	CBM1	23
NCU09416	cellulose-binding GDSL lipase/acylhydrolase	CBM_1, Lipase_GDSL	CBM1,CE16	CBM1	18
NCU00762	endoglucanase 3	CBM_1, Cellulase	CBM1,GH5	CBM1	16	gh5-1	1.05	C-compound and carbohydrate metabolism
NCU09680	cellobiohydrolase CBHII	Glyco_hydro_6, CBM_1	CBM1,GH6	CBM1	18	gh6-2	01.05.02.07	sugar, glucoside, polyol and carboxylate catabolism
NCU08746	starch binding domain-containing protein	CBM_20	CBM20	CBM20	18
NCU04870	acetyl xylan esterase	Esterase_phd	CE1	_	17	ce1-1	01.05.03	polysaccharide metabolism
NCU00710	acetyl xylan esterase	Esterase_phd, CBM_1	CE1,CBM1	CBM1	20
NCU09445	Cip2	_	CE15	_	18
NCU05751	cellulose-binding protein	Lipase_GDSL	CE3	_	19	ce3-2	01.05.03	polysaccharide metabolism
NCU09582	chitin deacetylase	Polysacc_deac_1	CE4	_	18	ce4-1	01.05.03	polysaccharide metabolism
NCU09664	acetylxylan esterase	Cutinase	CE5	_	18	ce5-3	01.05.03	polysaccharide metabolism
NCU05159	acetylxylan esterase	Cutinase, CBM_1	CE5,CBM1	CBM1	21	ce5-2	01.05.03	polysaccharide metabolism
NCU10045	pectinesterase	Pectinesterase	CE8	_	20
NCU03181	acetylxylan esterase	Lipase_GDSL	CEnc	_	19
NCU00130	beta-glucosidase	Glyco_hydro_1	GH1	_		gh1-1	01.05.02.07	sugar, glucoside, polyol and carboxylate catabolism
NCU05924	endo-1,4-beta-xylanase	Glyco_hydro_10	GH10	_	16
NCU08189	endo-1,4-beta-xylanase	Glyco_hydro_10	GH10	_	20	gh10-2	01.05.03	polysaccharide metabolism
NCU02855	endo-1,4-beta-xylanase A	Glyco_hydro_11	GH11	_	16	gh11-1	1.05	C-compound and carbohydrate metabolism
NCU07225	endo-1,4-beta-xylanase 2	Glyco_hydro_11	GH11,CBM1	CBM1	20	gh11-2	01.05.02.07	sugar, glucoside, polyol and carboxylate catabolism
NCU06143	hypothetical protein	_	GH115	_	20
NCU01720	hypothetical protein	Glyco_hydro_cc	GH128	_	20
NCU05974	cell wall glucanosyltransferase Mwg1	Glyco_hydro_16	GH16	_	17	gh16-7	70.01	cell wall
NCU04168	hypothetical protein	Glyco_hydro_16	GH16	_		gh16-2	70.01	cell wall
NCU01353	mixed-linked glucanase	Glyco_hydro_16	GH16	_	28	gh16-1	1.05	C-compound and carbohydrate metabolism
NCU00890	beta-mannosidase	Glyco_hydro_2_N, Glyco_hydro_2	GH2	_		gh2-1	01.05.03	polysaccharide metabolism
NCU08087	hypothetical protein	Glyco_hydro_26	GH26	_
NCU08755	beta-glucosidase 1	Fn3-like, Glyco_hydro_3, Glyco_hydro_3_C	GH3	_	18
NCU00709	beta-xylosidase	Glyco_hydro_3, Glyco_hydro_3_C	GH3	_	20	gh3-8	01.05.03	polysaccharide metabolism
NCU07487	periplasmic beta-glucosidase	Fn3-like, PA14, Glyco_hydro_3, Glyco_hydro_3_C	GH3	_
NCU09652	beta-xylosidase	Glyco_hydro_43	GH43	_		gh43-5	01.05.03	polysaccharide metabolism
NCU01900	xylosidase/arabinosidase	Glyco_hydro_43, Glyco_hydro_43	GH43	_		gh43-2	01.05.03	polysaccharide metabolism
NCU01059	glycosyl hydrolase family 47 protein	Glyco_hydro_47	GH47	_	19	gh47-3	1.05	C-compound and carbohydrate metabolism
NCU08412	endo-beta-1,4-mannanase	Cellulase	GH5	_		None	01.05.02.07	sugar, glucoside, polyol and carboxylate catabolism
NCU02343	alpha-L-arabinofuranosidase 2	Alpha-L-AF_C	GH51	_	25
NCU07190	exoglucanase 3	Glyco_hydro_6	GH6	_	19	gh6-3	1.05	C-compound and carbohydrate metabolism
NCU01050	polysaccharide monooxygenase-2	Glyco_hydro_61	GH61	_	15	gh61-4	01.05.02.07	sugar, glucoside, polyol and carboxylate catabolism
NCU07898	polysaccharide monooxygenase-3	Glyco_hydro_61	GH61	_	16	gh61-13	01.05.03	polysaccharide metabolism
NCU02240	endoglucanase II	Glyco_hydro_61, CBM_1	GH61,CBM1	CBM1	15	gh61-1	01.05.03	polysaccharide metabolism
NCU07760	endoglucanase IV	Glyco_hydro_61, CBM_1	GH61,CBM1	CBM1	18	gh61-2	01.05.03	polysaccharide metabolism
NCU00836	hypothetical protein	Glyco_hydro_61, CBM_1	GH61,CBM1	CBM1	18	gh61-7	1.05	C-compound and carbohydrate metabolism
NCU08760	lytic polysaccharide monooxygenase	Glyco_hydro_61, CBM_1	GH61,CBM1	CBM1	20	gh61-5	01.05.03	polysaccharide metabolism
NCU02916	lytic polysaccharide monooxygenase	Glyco_hydro_61, CBM_1	GH61,CBM1	CBM1	16	gh61-3	01.05.03	polysaccharide metabolism
NCU05057	endoglucanase EG-1	Glyco_hydro_7	GH7	_	18
NCU04854	endoglucanase EG-1	Glyco_hydro_7	GH7	_	17	gh7-2	01.05.03	polysaccharide metabolism
NCU07340	cellobiohydrolase CBHI	CBM_1, Glyco_hydro_7	GH7,CBM1	CBM1	17	cbh-1	01.05.03	polysaccharide metabolism
NCU07253	1,3-beta-glucanosyltransferase gel1	Glyco_hydro_72	GH72	_	18	gh72-4	1.05	C-compound and carbohydrate metabolism
NCU05955	Cel74a	CBM_1	GH74,CBM1	CBM1	20	gh74-1	01.05.03	polysaccharide metabolism
NCU09425	NdvB protein	Glyco_transf_36, GT36_AF	GH94	_		gh94-1	01.05.03	polysaccharide metabolism
NCU02668	cell wall synthesis protein-Penicillium	SUN	GHnc	_	18
NCU09906	hypothetical protein	Glyco_trans_2_3	GTnc	_
NCU08176	pectate lyase A	Pectate_lyase	PL3	_	19	ply-2	01.05.03	polysaccharide metabolism
NCU10110	3-hydroxyisobutyrate dehydrogenase	NAD_binding_2		_	21	None	01.01.11.03.02	degradation of valine
NCU03963	5'-methylthioadenosine phosphorylase	PNP_UDP_1		_
NCU07143	6-phosphogluconolactonase	Lactonase		_	20	None	1.01	amino acid metabolism
NCU05591	ABC transporter CDR4	PDR_CDR, ABC2_membrane, ABC2_membrane, ABC_tran		_		abc-5	16.19.03	ATP binding
NCU08752	acetylcholinesterase	COesterase		_	24	cea-8	1.06	lipid, fatty acid and isoprenoid metabolism
NCU08398	aldose 1-epimerase	Aldose_epim		_	19
NCU08980	alternative NADH-dehydrogenase	Pyr_redox_2, Pyr_redox		_		None	02.13.03	aerobic respiration
NCU03013	anchored cell wall protein 10	Sod_Cu		_	19	acw-10	32.01	stress response
NCU05667	anchored cell wall protein 3	GPI-anchored		_	18
NCU07277	anchored cell wall protein 8	_		_	18	acw-8	01.05.03	polysaccharide metabolism
NCU09264	APAF1-interacting protein	Aldolase_II		_		None	98	CLASSIFICATION NOT YET CLEAR-CUT
NCU03756	aromatic amino acid aminotransferase 1	Aminotran_1_2		_		None	01.01.13	regulation of amino acid metabolism
NCU08411	aspartate aminotransferase, variant	Aminotran_1_2		_		aat-1	01.01.06	metabolism of the aspartate family
NCU08411	aspartate aminotransferase, variant	Aminotran_1_2		_		aat-1	01.01.06	metabolism of the aspartate family
NCU10009	ATP-binding cassette transporter	PDR_CDR, ABC2_membrane, ABC2_membrane, ABC_tran		_		None	16.19.03	ATP binding
NCU04292	branched-chain-amino-acid aminotransferase	Aminotran_4		_		val-1	1.01	amino acid metabolism
NCU00326	calcium homeostasis protein Regucalcin	SGL		_		None	40.2	cell aging
NCU05980	carboxypeptidase S1	Peptidase_S10		_	35	None	14.13	protein/peptide degradation
NCU00801	cdt-1	Sugar_tr		_		None	20.01.03	C-compound and carbohydrate transport
NCU08114	cdt-2	Sugar_tr		_
NCU05853	cdt-3	Sugar_tr		_	45	None	20.01.03	C-compound and carbohydrate transport
NCU00292	cholinesterase	COesterase		_	24	cea-3	1.06	lipid, fatty acid and isoprenoid metabolism
NCU02500	clock-controlled pheromone CCG-4	_		_	16	ccg-4	34.11.03.07	pheromone response, mating-type determination, sex-specific proteins
NCU07705	clr-1	Fungal_trans, Zn_clus		_
NCU08042	clr-2	Fungal_trans, Zn_clus		_
NCU06137	cytochrome P450 55A2	p450		_		cyp450-13	20.01.15	electron transport
NCU05848	cytochrome P450 monooxygenase	p450		_	29	cyp450-11	32.05.03	defense related proteins
NCU11353	D-xylulose kinase	FGGY_C, FGGY_N		_
NCU01013	delta-aminolevulinic acid dehydratase	ALAD		_		None	01.07.01	biosynthesis of vitamins, cofactors, and prosthetic groups
NCU08115	DNA mismatch repair protein Msh3	MutS_II, MutS_IV, MutS_III, MutS_I, MutS_V		_		msh3	10.01.05.01	DNA repair
NCU02059	endothiapepsin	Asp		_	21	41367	14.13	protein/peptide degradation
NCU03131	FAD dependent oxidoreductase superfamily	DAO		_
NCU09291	FAD dependent sulfhydryl oxidase Erv2	Evr1_Alr		_	21
NCU03813	formate dehydrogenase	2-Hacid_dh_C, 2-Hacid_dh		_		fdh	1.05	C-compound and carbohydrate metabolism
NCU02009	FreB	FAD_binding_8, NAD_binding_6, Ferric_reduct		_		None	34.01.01.01	homeostasis of metal ions (Na, K, Ca etc.)
NCU04401	fructose-bisphosphate aldolase	F_bP_aldolase		_		None	1.05	C-compound and carbohydrate metabolism
NCU09705	GAL10	Aldose_epim		_	22	None	1.05	C-compound and carbohydrate metabolism
NCU08687	galactokinase	GalKase_gal_bdg, GHMP_kinases_C, GHMP_kinases_N		_
NCU01906	GCY protein	Aldo_ket_red		_		gcy-2	1.05	C-compound and carbohydrate metabolism
NCU03322	GDSL family lipase	Lipase_GDSL_2		_
NCU06364	GDSL lipase/acylhydrolase	Lipase_GDSL		_	22
NCU01195	Glu/Leu/Phe/Val dehydrogenase	ELFV_dehydrog_N, ELFV_dehydrog		_		am-1	01.01.03.01.02	degradation of glutamine
NCU06724	glutamine synthetase	Gln-synt_N, Gln-synt_C		_		gln-1	01.01.03.01.01	biosynthesis of glutamine
NCU04856	glutamine synthetase, variant	Gln-synt_N, Gln-synt_C		_
NCU04856	glutamine synthetase, variant	Gln-synt_N, Gln-synt_C		_
NCU01320	glutathione S-transferase, variant	MAPEG		_		None	98	CLASSIFICATION NOT YET CLEAR-CUT
NCU01320	glutathione S-transferase, variant	MAPEG		_		None	98	CLASSIFICATION NOT YET CLEAR-CUT
NCU01589	heat shock protein 60	Cpn60_TCP1		_
NCU01633	hexose transporter HXT13	Sugar_tr		_
NCU10521	hypothetical protein	GST_N_3, GST_C		_		None	32.07.07.03	glutathione conjugation reaction
NCU01983	hypothetical protein	MBA1		_	18
NCU05056	hypothetical protein	_		_
NCU05864	hypothetical protein	_		_	21
NCU00870	hypothetical protein	TPR_11, SET		_
NCU00763	hypothetical protein	_		_
NCU07339	hypothetical protein	_		_
NCU08113	hypothetical protein	_		_
NCU08790	hypothetical protein	SET		_	19
NCU09505	hypothetical protein	_		_	27
NCU01049	hypothetical protein	Fasciclin, Fasciclin		_
NCU00871	hypothetical protein	_		_
NCU01430	hypothetical protein	DUF2264, DUF2264		_
NCU09295	hypothetical protein	DUF3431		_	32
NCU01076	hypothetical protein	_		_	21
NCU04522	hypothetical protein	DUF1349		_
NCU09524	hypothetical protein	_		_	16
NCU02915	hypothetical protein	RhoGAP		_
NCU06607	hypothetical protein	_		_	18
NCU05826	hypothetical protein	_		_
NCU07510	hypothetical protein	_		_
NCU09689	hypothetical protein	Abhydrolase_3		_
NCU05846	hypothetical protein	DUF1479		_	16
NCU09176	hypothetical protein	_		_
NCU08756	hypothetical protein	_		_	22
NCU05068	hypothetical protein	RTA1		_		None	20.01.13	lipid/fatty acid transport
NCU04400	hypothetical protein	Dak1, Dak2		_		None	1.05	C-compound and carbohydrate metabolism
NCU05350	hypothetical protein	Sugar_tr		_	28
NCU08383	hypothetical protein	_		_
NCU02485	hypothetical protein	AMP-binding, DUF4009		_		None	01.01.09.04.01	biosynthesis of phenylalanine
NCU11933	hypothetical protein	_		_	21
NCU06142	hypothetical protein	Transaldolase		_		None	1.05	C-compound and carbohydrate metabolism
NCU08748	hypothetical protein	MFS_1		_		None	98	CLASSIFICATION NOT YET CLEAR-CUT
NCU06983	hypothetical protein	_		_	20
NCU00886	hypothetical protein	_		_
NCU11901	hypothetical protein	_		_
NCU05863	hypothetical protein	AAA		_
NCU01058	hypothetical protein	_		_
NCU07979	hypothetical protein	DUF3659		_
NCU06490	hypothetical protein	_		_
NCU09165	hypothetical protein	FAD_binding_4		_	20	None	1.05	C-compound and carbohydrate metabolism
NCU09498	hypothetical protein	_		_	19
NCU06991	hypothetical protein	_		_	38
NCU10697	hypothetical protein	Zn_clus		_
NCU11695	hypothetical protein	_		_
NCU09823	hypothetical protein	_		_	21
NCU09776	hypothetical protein	_		_
NCU00729	hypothetical protein	GPI-anchored		_	16
NCU11665	hypothetical protein	_		_
NCU05134	hypothetical protein	_		_	18
NCU10014	hypothetical protein	_		_	20
NCU04932	hypothetical protein	_		_	19
NCU05822	hypothetical protein	_		_
NCU04170	hypothetical protein	PAN_4, WSC, WSC, WSC, WSC, WSC		_	21
NCU04169	hypothetical protein	_		_	18
NCU01944	hypothetical protein	_		_
NCU01386	hypothetical protein	Fungal_trans, Zn_clus		_
NCU07222	hypothetical protein	_		_	24
NCU04557	hypothetical protein	_		_
NCU02882	hypothetical protein	_		_
NCU09506	hypothetical protein	_		_	22
NCU09415	hypothetical protein	_		_
NCU02625	hypothetical protein	_		_
NCU03293	hypothetical protein	_		_	23
NCU04467	hypothetical protein	_		_	20
NCU09522	hypothetical protein	O-FucT		_	43
NCU01196	hypothetical protein	Ferritin_2		_	21	None	32.01	stress response
NCU06387	hypothetical protein	_		_
NCU07997	hypothetical protein	_		_
NCU11483	hypothetical protein	_		_
NCU05569	hypothetical protein	_		_
NCU04603	hypothetical protein	_		_	17	None	70.01	cell wall
NCU00811	hypothetical protein	_		_	17
NCU06509	hypothetical protein	_		_	34
NCU02061	hypothetical protein	WSC		_
NCU09785	hypothetical protein	_		_	21
NCU04542	hypothetical protein	_		_	19
NCU01769	hypothetical protein	_		_	18
NCU08043	hypothetical protein	_		_	28
NCU10039	hypothetical protein	_		_	30
NCU08867	hypothetical protein	_		_
NCU00633	hypothetical protein	Acetyltransf_9		_
NCU04904	hypothetical protein	Methyltransf_23		_
NCU04910	hypothetical protein	Methyltransf_23		_
NCU01136	hypothetical protein	_		_
NCU09424	hypothetical protein	Beta_helix		_	22
NCU08193	hypothetical protein	_		_	20
NCU04543	hypothetical protein	_		_	18
NCU07017	hypothetical protein	_		_	17
NCU07503	hypothetical protein	DUF3602		_
NCU00992	hypothetical protein	_		_
NCU07063	hypothetical protein	Asp		_	23	41372	14.07.11	protein processing (proteolytic)
NCU01742	hypothetical protein	Apc15p		_
NCU01211	hypothetical protein	T5orf172		_
NCU03552	hypothetical protein	zf-C2H2_4, zf-C2H2_4		_		None	11.02.03.04	transcriptional control
NCU04058	hypothetical protein	bZIP_1		_
NCU05574	hypothetical protein, variant	Acetyltransf_1		_
NCU05574	hypothetical protein, variant	Acetyltransf_1		_
NCU06206	hypothetical protein, variant	_		_
NCU06206	hypothetical protein, variant	_		_
NCU02627	hypothetical protein, variant	_		_	25
NCU02627	hypothetical protein, variant	_		_	25
NCU08750	isoamyl alcohol oxidase	FAD_binding_4		_	23
NCU01866	lactonohydrolase	SGL		_	28
NCU03639	lipase	Lipase_3		_	17	tgl-1	1.06	lipid, fatty acid and isoprenoid metabolism
NCU04475	lipase B	_		_	23	None	01.06.02.01	phospholipid metabolism
NCU05580	membrane transporter	MFS_1		_		None	20.01.27	drug/toxin transport
NCU10021	MFS monosaccharide transporter	Sugar_tr		_
NCU07668	MFS multidrug transporter	MFS_1		_
NCU06384	MFS sugar transporter	Sugar_tr		_		None	20.01.03	C-compound and carbohydrate transport
NCU01692	mitochondrial citrate synthase	Citrate_synt		_		cit-1	2.04	glyoxylate cycle
NCU10106	mitochondrial triosephosphate isomerase	TIM		_
NCU07224	monooxygenase	FAD_binding_2		_	24	None	32.07.03	detoxification by modification
NCU07055	monooxygenase	FAD_binding_3, FAD_binding_2		_	29	None	1.06	lipid, fatty acid and isoprenoid metabolism
NCU04537	monosaccharide transporter	Sugar_tr		_		None	20.01.03	C-compound and carbohydrate transport
NCU07546	multidrug resistance protein MDR	ABC_membrane, ABC_membrane, ABC_tran, ABC_tran		_		abc-8	20.01.27	drug/toxin transport
NCU01704	NADP:D-xylose dehydrogenase	GFO_IDH_MocA		_	24	None	1.2	secondary metabolism
NCU04933	nucleoside-diphosphate-sugar epimerase	_		_	19
NCU08044	oxidoreductase	adh_short		_	27
NCU07736	PEP5	MFS_1		_		None	20.01.27	drug/toxin transport
NCU05548	phospho-2-dehydro-3-deoxyheptonate aldolase	DAHP_synth_1		_		aro-6	1.01	amino acid metabolism
NCU02918	polyketide synthase 6	ADH_zinc_N_2, ADH_N, Ketoacyl-synt_C, PP-binding, Acyl_transf_1, ketoacyl-synt, KR		_		pks-6	32.05.05	virulence, disease factors
NCU06138	quinate permease	Sugar_tr		_		None	20.01.03	C-compound and carbohydrate transport
NCU08164	retinol dehydrogenase 13	adh_short		_		None	1.05	C-compound and carbohydrate metabolism
NCU10107	ribose 5-phosphate isomerase	LacAB_rpiB		_	4	None	1.05	C-compound and carbohydrate metabolism
NCU07737	salicylate hydroxylase	FAD_binding_3, FAD_binding_2		_	25	None	1.2	secondary metabolism
NCU02097	short chain dehydrogenase	adh_short_C2		_		None	1.05	C-compound and carbohydrate metabolism
NCU04791	short chain dehydrogenase/reductase	adh_short		_		None	1.05	C-compound and carbohydrate metabolism
NCU10572	short chain oxidoreductase	adh_short		_
NCU01907	syntaxin 5	SNARE, Syntaxin		_
NCU09098	tetracycline transporter	MFS_1		_	29	None	20.01.27	drug/toxin transport
NCU03607	threonine dehydratase catabolic	PALP		_		None	01.01.06.04.01	biosynthesis of threonine
NCU00761	triacylglycerol lipase	COesterase		_	27	cea-4	1.06	lipid, fatty acid and isoprenoid metabolism
NCU06383	UPF0075 domain-containing protein	UPF0075		_
NCU00309	WSC domain-containing protein	DUF1996, WSC		_	18
NCU00891	xylitol dehydrogenase	ADH_N, ADH_zinc_N		_		None	1.05	C-compound and carbohydrate metabolism
NCU08384	xylose reductase	Aldo_ket_red		_		xr	01.05.03	polysaccharide metabolism

## Sheet: cluster_173 genes
NCU	Annotation	Pfam Domains	CAZy	CBMs	signal P (site)	Symbol	FunCatId	FunCatName
NCU05851	4-coumarate-CoA ligase 1	AMP-binding, DUF4009		_		None	01.20.35.01	metabolism of phenylpropanoids
NCU04614	60S ribosomal protein L19	FUSC_2		_
NCU00290	ABC transporter	ABC2_membrane, ABC_tran		_
NCU07617	Acr1	_		_		acon-3	11.02.03.04	transcriptional control
NCU02969	alkaline ceramidase	Ceramidase		_
NCU07269	alpha-1,2-mannosidase	Glyco_hydro_92, Glyco_hydro_92	GH92	_	19
NCU09281	alpha-glucosidase	Glyco_hydro_31, Gal_mutarotas_2	GH31	_	20
NCU05597	ascus development protein 3	Sugar_tr		_	33	asd-3	34.11.03.07	pheromone response, mating-type determination, sex-specific proteins
NCU08128	benzoate 4-monooxygenase cytochrome P450	p450		_	33
NCU08699	bli-4 protein	adh_short		_
NCU03043	C2H2 finger domain-containing protein FlbC	zf-H2C2_2		_		acon-4	11.02.03.04	transcriptional control
NCU08791	catalase-1	Catalase-rel, DJ-1_PfpI, Catalase		_		cat-1	32.01	stress response
NCU11307	CCC1	VIT1		_		None	34.01.01.01	homeostasis of metal ions (Na, K, Ca etc.)
NCU05239	chitin synthase A	Chitin_synth_1N, Chitin_synth_1	GT2	_		chs-2	01.05.03	polysaccharide metabolism
NCU08769	conidiation-specific protein 6	Con-6, Con-6		_
NCU07325	conidiation-specific protein con-10	KGG, KGG, KGG		_		con-10	43.01.03.07	development of conidia
NCU09235	conidiation-specific protein-8	_		_		None	43.01.03	fungal and other eukaryotic cell type differentiation
NCU00582	cryptochrome DASH	FAD_binding_7, DNA_photolyase		_
NCU05222	CTLH domain-containing protein	CLTH, LisH		_
NCU05006	cytochrome P450	p450		_
NCU08626	deoxyribodipyrimidine photolyase	FAD_binding_7, DNA_photolyase		_
NCU07498	DNA excision repair protein Rad2	XPG_N, XPG_I		_		mus-40	10.01.05.01	DNA repair
NCU07837	DNA repair protein Rhp26/Rad26	SNF2_N, SNF2_N, Helicase_C		_
NCU05819	DUF1237 domain-containing protein	DUF1237	GH125	_
NCU04533	DUF1881 domain-containing protein	DUF1881		_		app	34.07.01	cell-cell adhesion
NCU07474	ergot alkaloid biosynthetic protein A	NAD_binding_10		_
NCU03049	flavin-binding monooxygenase	Pyr_redox_3		_
NCU01089	flavin-containing amine oxidasedehydrogenase	NAD_binding_8		_
NCU01427	geranylgeranyl pyrophosphate synthetase	polyprenyl_synt		_		al-3	01.06.06	isoprenoid metabolism
NCU06005	glycerol kinase	FGGY_C, FGGY_N		_		None	1.05	C-compound and carbohydrate metabolism
NCU03098	glycosyl hydrolase	Glyco_hydro_15	GH15	_
NCU00244	glycosyl transferase	Glyco_transf_8	GT8	_		gt8-1	01.05.03	polysaccharide metabolism
NCU05005	HHE domain-containing protein	Hemerythrin		_
NCU08152	high affinity glucose transporter	Sugar_tr		_	22	None	20.01.03	C-compound and carbohydrate transport
NCU02724	HLH transcription factor	HLH		_		None	11.02.03.04	transcriptional control
NCU08480	HSF-type DNA-binding domain-containing protein	HSF_DNA-bind		_
NCU09968	hypothetical protein	_		_
NCU02307	hypothetical protein	Fungal_trans_2, Zn_clus		_
NCU03863	hypothetical protein	RTA1		_
NCU02046	hypothetical protein	_		_
NCU06328	hypothetical protein	_		_	23
NCU04914	hypothetical protein	_		_
NCU01063	hypothetical protein	_		_	20
NCU05639	hypothetical protein	_		_	27
NCU09969	hypothetical protein	_		_
NCU03253	hypothetical protein	7tm_2		_
NCU05229	hypothetical protein	_		_	28
NCU05189	hypothetical protein	_		_
NCU07718	hypothetical protein	Acetyltransf_7		_
NCU00322	hypothetical protein	_		_	16
NCU04341	hypothetical protein	_		_
NCU04605	hypothetical protein	_		_
NCU01840	hypothetical protein	_		_
NCU03444	hypothetical protein	_		_
NCU00705	hypothetical protein	_		_
NCU06252	hypothetical protein	DSPc		_		None	14.07.03	modification by phosphorylation, dephosphorylation, autophosphorylation
NCU02326	hypothetical protein	HMG_box		_
NCU07527	hypothetical protein	HET		_
NCU05061	hypothetical protein	zf-C2H2		_
NCU04126	hypothetical protein	_		_
NCU07176	hypothetical protein	_		_		amt	1.2	secondary metabolism
NCU06915	hypothetical protein	_		_	23
NCU09271	hypothetical protein	_		_	29
NCU07363	hypothetical protein	DUF3712		_	55
NCU00561	hypothetical protein	_		_
NCU06265	hypothetical protein	_		_
NCU04866	hypothetical protein	Fungal_trans, Zn_clus		_		ada-6	01.05.25	regulation of C-compound and carbohydrate metabolism
NCU08455	hypothetical protein	_		_	26
NCU01109	hypothetical protein	Con-6, Con-6		_
NCU00939	hypothetical protein	PAS_9, HisKA, Response_reg, HATPase_c		_
NCU04851	hypothetical protein	Fungal_trans, Zn_clus		_
NCU09196	hypothetical protein	_		_	22
NCU02130	hypothetical protein	_		_
NCU04106	hypothetical protein	_		_	42	None	32.05	disease, virulence and defense
NCU08557	hypothetical protein	_		_
NCU07476	hypothetical protein	PAF-AH_p_II, PAF-AH_p_II		_		None	14.07.04	modification by acetylation, deacetylation
NCU04862	hypothetical protein	_		_
NCU04861	hypothetical protein	Ank_2, Ank_2, Ank_2, Ank_2		_
NCU09273	hypothetical protein	FAD_binding_4		_	33
NCU09272	hypothetical protein	_		_		gib-1	01.06.06.07	diterpenes metabolism
NCU09274	hypothetical protein	p450		_		gib-2	1.06	lipid, fatty acid and isoprenoid metabolism
NCU05084	hypothetical protein	_		_
NCU09270	hypothetical protein	Tcp11		_
NCU02849	hypothetical protein	_		_
NCU06306	hypothetical protein	SNF2_N, Helicase_C		_		crf5-1	10.01.09.05	DNA conformation modification (e.g. chromatin)
NCU01260	hypothetical protein	B-block_TFIIIC		_
NCU08487	hypothetical protein	_		_		None	98	CLASSIFICATION NOT YET CLEAR-CUT
NCU00246	hypothetical protein	_		_	15	None	32.05.05	virulence, disease factors
NCU00245	hypothetical protein	_		_
NCU09685	hypothetical protein	DUF1772		_	16
NCU06534	hypothetical protein	zf-RING_2		_
NCU01189	hypothetical protein	_		_
NCU02355	hypothetical protein	_		_
NCU12090	hypothetical protein	_		_
NCU05581	hypothetical protein	_		_
NCU07684	hypothetical protein	PPR_3		_
NCU02990	hypothetical protein	_		_	20
NCU04233	hypothetical protein	Alpha_kinase, VWA_2		_
NCU04941	hypothetical protein	IBR		_
NCU10429	hypothetical protein	_		_
NCU01135	hypothetical protein	_		_
NCU04939	hypothetical protein	_		_
NCU01608	hypothetical protein	_		_	19
NCU03354	hypothetical protein	HET		_		None	34.11.03.07	pheromone response, mating-type determination, sex-specific proteins
NCU09342	hypothetical protein	_		_
NCU01493	hypothetical protein	_		_	23
NCU07766	hypothetical protein	Beta-lactamase		_
NCU04986	hypothetical protein	_		_
NCU08037	hypothetical protein	_		_
NCU04486	hypothetical protein	_		_	33
NCU03398	hypothetical protein	_		_
NCU09335	hypothetical protein	_		_
NCU11959	hypothetical protein	_		_
NCU04881	hypothetical protein	NACHT, Ank_2, Ank_2, Ank_2, Ank		_
NCU08537	hypothetical protein	NACHT		_
NCU08770	hypothetical protein	_		_
NCU02608	hypothetical protein	Methyltransf_16		_
NCU12016	hypothetical protein	_		_
NCU09049	hypothetical protein	MARVEL		_
NCU01972	hypothetical protein	_		_
NCU11464	hypothetical protein	_		_
NCU11851	hypothetical protein	_		_
NCU05870	hypothetical protein	OTT_1508_deam		_
NCU09232	hypothetical protein	IBR		_
NCU07948	hypothetical protein	DUF4237		_	19
NCU02164	hypothetical protein	_		_	25
NCU08156	hypothetical protein	Abhydrolase_6		_
NCU03035	hypothetical protein	_		_
NCU08447	hypothetical protein	_		_	29
NCU06156	hypothetical protein	_		_
NCU01880	hypothetical protein	_		_
NCU00859	hypothetical protein	_		_	21
NCU06566	hypothetical protein	_		_
NCU08726	hypothetical protein	Zn_clus		_		fl	11.02.03.04.01	transcription activation
NCU09883	hypothetical protein	_		_	17
NCU09734	hypothetical protein	_		_	21
NCU06334	hypothetical protein	_		_
NCU03011	hypothetical protein	Aminotran_5		_		nit-14	14.07	protein modification
NCU00755	hypothetical protein	MatE, MatE		_		None	20.01.27	drug/toxin transport
NCU09796	integral membrane protein	_		_	43
NCU00848	integral membrane protein TmpA	_		_
NCU04539	L-lactate dehydrogenase	FMN_dh		_		None	1.05	C-compound and carbohydrate metabolism
NCU07067	mannosyl-oligosaccharide alpha-1,2-mannosidase	Glyco_hydro_47	GH47	_	29	gh47-5	1.05	C-compound and carbohydrate metabolism
NCU01868	MFS maltose permease MalP	Sugar_tr		_		None	20.01.03	C-compound and carbohydrate transport
NCU04656	MFS transporter	MFS_1		_
NCU04374	MFS transporter	MFS_1		_
NCU07609	MFS transporter	MFS_1		_		None	20.01.03	C-compound and carbohydrate transport
NCU03107	MFS transporter	MFS_1, MFS_1		_	30
NCU08824	molybdopterin binding domain-containing protein	MoCF_biosynth		_
NCU06153	monooxygenase	Pyr_redox_3		_
NCU08880	neutral amino acid permease	Aa_trans		_		aap-18	20.01.07	amino acid/amino acid derivatives transport
NCU00586	non-anchored cell wall protein 6	SUR7		_	34
NCU10055	opsin-1	Bac_rhodopsin		_
NCU04568	pantothenate transporter liz1	MFS_1		_
NCU07876	PH domain-containing protein	PH, PH		_
NCU00007	pH-response regulator protein palH/rim-21	PalH		_		prr-4	30.05	transmembrane signal transduction
NCU05818	phosphatidyl synthase	Hydrolase_like, Hydrolase_6		_
NCU04478	phospholipase D active site-containing protein	PLDc_2		_
NCU00585	phytoene synthase	SQS_PSY		_	46
NCU07519	PIF1	PIF1, PIF1, Herpes_Helicase		_		None	10.01.05.01	DNA repair
NCU04865	polyketide synthase 3	Ketoacyl-synt_C, PP-binding, Acyl_transf_1, ADH_zinc_N, ketoacyl-synt, Methyltransf_12, KR		_		pks-3	01.20.05.11	metabolism of polyketides
NCU05767	PRO1A C6 Zink-finger protein	Fungal_trans_2, Zn_clus		_		None	16.03.01	DNA binding
NCU08457	rodlet protein	_		_	18	eas	43.01.03.09	development of asco- basidio- or zygospore
NCU01861	short chain dehydrogenase/reductase family	adh_short		_	25
NCU07434	short-chain dehydrogenase/reductase SDR	_		_		None	1.06	lipid, fatty acid and isoprenoid metabolism
NCU07564	siderophore iron transporter mirC	MFS_1		_		None	20.01.01.01.01.01	siderophore-iron transport
NCU02826	sodium/calcium exchanger protein	Na_Ca_ex, Na_Ca_ex		_	30
NCU03188	sugar 1,4-lactone oxidase	ALO, FAD_binding_4		_		alo-1	1.05	C-compound and carbohydrate metabolism
NCU04474	sulfite oxidase	Mo-co_dimer, Oxidored_molyb		_		mol-1	1.02	nitrogen, sulfur and selenium metabolism
NCU01862	SWIRM domain-containing protein FUN19	SWIRM		_
NCU01268	ubiquitin-conjugating enzyme E2 6	UQ_con		_		None	14.07.05	modification by ubiquitination, deubiquitination
NCU08850	UV-endonuclease UVE-1	UvdE		_		mus-18	10.01.05.01	DNA repair
NCU01572	WD domain-containing protein	WD40		_

## Sheet: cluster_360 genes
NCU	Annotation	Pfam Domains	CAZy	CBMs	signal P (site)	Symbol	FunCatId	FunCatName
NCU07741	1-acyl-sn-glycerol-3-phosphate acyltransferase	Acyltransferase		_		None	1.06	lipid, fatty acid and isoprenoid metabolism
NCU04419	2-oxoglutarate-dependent	DIOX_N, 2OG-FeII_Oxy		_
NCU07547	60S acidic ribosomal protein P0	Ribosomal_L10		_		None	01.03.16.01	RNA degradation
NCU06382	ABC transporter	ABC_membrane, ABC_membrane, ABC_tran, ABC_tran		_	32	None	20.01.13	lipid/fatty acid transport
NCU06836	acetyl-coenzyme A synthetase	DUF3448, AMP-binding, DUF4009		_		acu-5	1.05	C-compound and carbohydrate metabolism
NCU08167	aerobactin siderophore biosynthesis protein	Acetyltransf_8		_
NCU01754	alcohol dehydrogenase I, variant	ADH_N, ADH_zinc_N		_		adh-1	2.01	glycolysis and gluconeogenesis
NCU01754	alcohol dehydrogenase I, variant	ADH_N, ADH_zinc_N		_		adh-1	2.01	glycolysis and gluconeogenesis
NCU05340	alkanesulfonate monooxygenase	Bac_luciferase		_		None	1.02	nitrogen, sulfur and selenium metabolism
NCU01816	allantoicase	Allantoicase, Allantoicase		_		alc-1	01.03.01	purin nucleotide/nucleoside/nucleobase metabolism
NCU07351	alpha-glucuronidase	Glyco_hydro_67C, Glyco_hydro_67M, Glyco_hydro_67N	GH67	_	16	gh67-1	01.05.03	polysaccharide metabolism
NCU09738	alpha-ketoglutarate dependent xanthine	TauD		_	2
NCU06332	alpha/beta hydrolase	Abhydrolase_6		_
NCU07953	alternative oxidase	AOX		_		aod-1	2.13	respiration
NCU04874	alternative oxidase	AOX		_		aod-3	02.13.03	aerobic respiration
NCU05775	amino acid transporter	Aa_trans		_
NCU06424	aminomethyl transferase	GCV_T		_
NCU03257	ammonium transporter MEP1	Ammonium_transp		_		tam-1	20.01.01.01	cation transport (H+, Na+, K+, Ca2+ , NH4+, etc.)
NCU06586	AN1 zinc finger protein	zf-AN1, zf-AN1		_
NCU06651	AN1-type zinc finger protein	zf-AN1		_
NCU04421	annexin XIV	Annexin, Annexin, Annexin, Annexin		_		anx14	16.17.01	calcium binding
NCU02084	arginase	Arginase		_	18	None	01.01.05.01.01	biosynthesis of polyamines
NCU05168	arginine transporter	AA_permease		_	41
NCU04269	aspartyl proteinase	Asp		_		41370	14.13	protein/peptide degradation
NCU00915	aspartyl-tRNA synthetase	tRNA-synt_2, tRNA_anti		_		None	12.1	aminoacyl-tRNA-synthetases
NCU07082	aspartyl-tRNA synthetase	DUF2156, tRNA-synt_2, tRNA_anti		_		None	12.1	aminoacyl-tRNA-synthetases
NCU00644	ATP synthase subunit G	ATP-synt_G		_
NCU09076	ATP-dependent RNA helicase	DEAD, Helicase_C		_		None	11.04.03.01	splicing
NCU07839	ATP-dependent RNA helicase dbp-2	DEAD, Helicase_C		_		drh-1	11.04.03.01	splicing
NCU01369	ATP-dependent RNA helicase ded-1	DEAD, Helicase_C		_
NCU09663	Axe2	Cutinase	CE5	_		ce5-1	01.05.03	polysaccharide metabolism
NCU04637	BAR adaptor protein RVS167	BAR, SH3_1		_		None	43.01.03	fungal and other eukaryotic cell type differentiation
NCU10028	bax Inhibitor family protein	Bax1-I		_
NCU08907	BYS1 domain-containing protein	Bys1		_	19	ccg-13	40.01	cell growth / morphogenesis
NCU06402	C-4 methylsterol oxidase, variant	FA_hydroxylase		_
NCU06402	C-4 methylsterol oxidase, variant	FA_hydroxylase		_
NCU06207	C-5 sterol desaturase	FA_hydroxylase		_		erg-10	1.06	lipid, fatty acid and isoprenoid metabolism
NCU04156	C-8 sterol isomerase erg-1	ERG2_Sigma1R		_		erg-1	1.06	lipid, fatty acid and isoprenoid metabolism
NCU02244	C2 domain-containing protein	C2		_
NCU01640	C2H2 transcription factor	zf-C2H2_4, zf-C2H2_4, zf-C2H2_4		_		rpn-4	11.02.03.04	transcriptional control
NCU01504	calcineurin binding protein	Calcipressin		_		None	10.03.02	meiosis
NCU07787	clock controlled protein CCG-14	Cerato-platanin		_	18	ccg-14	32.05	disease, virulence and defense
NCU09686	clock-controlled protein 8	Opi1		_
NCU09559	clock-controlled protein 9	Glycos_transf_1	GT4	_
NCU03781	CobW domain-containing protein	cobW		_	35
NCU01546	coproporphyrinogen III oxidase	Coprogen_oxidas		_		None	01.20.19.01	metabolism of porphyrins
NCU03887	CreD	Arrestin_C, Arrestin_N		_		None	32.01	stress response
NCU05309	Cut9 interacting protein Scn1	TatD_DNase		_		None	10.03.01	mitotic cell cycle and cell cycle control
NCU04697	cyanide hydratase	CN_hydrolase		_		cnh-1	01.02.02.09	catabolism of nitrogenous compounds
NCU04847	cyclin	Cyclin_N		_		div-9	10.03.01	mitotic cell cycle and cell cycle control
NCU00522	cystathionine beta-lyase	Cys_Met_Meta_PP		_		None	01.01.06.05	metabolism of methionine
NCU07466	cystathionine beta-synthase	_		_
NCU01808	cytochrome c	Cytochrom_C		_		cyc-1	2.11	electron transport and membrane-associated energy conservation
NCU05601	cytochrome c heme lyase	Cyto_heme_lyase		_		cyt-2	01.20.19.01	metabolism of porphyrins
NCU03297	cytochrome c peroxidase, variant	peroxidase		_		ccp-1	32.01.01	oxidative stress response
NCU03297	cytochrome c peroxidase, variant	peroxidase		_		ccp-1	32.01.01	oxidative stress response
NCU02624	cytochrome P450 51	p450		_	42	erg-8	01.06.06.11	tetracyclic and pentacyclic triterpenes (cholesterin, steroids and hopanoids) metabolism
NCU02128	D-arabinitol dehydrogenase	adh_short_C2		_		None	1.05	C-compound and carbohydrate metabolism
NCU02305	decaprenyl-diphosphate synthase subunit 1	polyprenyl_synt		_		coq-1	01.20.15.03	metabolism of ubiquinone
NCU08319	developmental regulator flbA	DEP, RGS		_		None	34.11.03.07	pheromone response, mating-type determination, sex-specific proteins
NCU02665	diacylglycerol O-acyltransferase	DAGAT		_
NCU06532	dihydroorotate reductase PyrE	DHO_dh		_	15	pyr-1	01.03.04	pyrimidine nucleotide/nucleoside/nucleobase metabolism
NCU08807	DNA-binding protein cre-1	zf-H2C2_2, zf-H2C2_2		_		cre-1	01.05.25	regulation of C-compound and carbohydrate metabolism
NCU07414	DnaJ family protein	DnaJ_C, DnaJ_CXXCXGXG, DnaJ		_		djc-4	14.04	protein targeting, sorting and translocation
NCU04315	dre-2	CIAPIN1		_
NCU00866	DUF1275 domain-containing protein	DUF1275		_
NCU02504	DUF1640 domain-containing protein	DUF1640		_
NCU06174	DUF1649 domain-containing protein	DUF1649		_
NCU05881	DUF500 and UBA/TS-N domain-containing protein	DUF500		_
NCU06389	DUF625 domain-containing protein	SMK-1		_
NCU05525	DUF833 domain-containing protein	NRDE		_
NCU03737	elongation factor Tu	GTP_EFTU_D3, GTP_EFTU_D2, GTP_EFTU		_	18	None	12.04	translation
NCU03682	endonuclease/exonuclease/phosphatase	Exo_endo_phos		_
NCU00684	endonuclease/Exonuclease/phosphatase, variant	Exo_endo_phos		_
NCU00684	endonuclease/Exonuclease/phosphatase, variant	Exo_endo_phos		_
NCU02074	endoplasmic oxidoreductin-1	ERO1		_	22	eor-1	14.07	protein modification
NCU06939	endosome-associated ubiquitin isopeptidase	JAB		_
NCU01870	Eno3 protein	Enolase_N, Enolase_C		_
NCU07257	F-box domain-containing protein	F-box-like		_
NCU03697	FAD binding domain-containing protein	FAD_binding_1, NAD_binding_1		_		None	98	CLASSIFICATION NOT YET CLEAR-CUT
NCU06042	FAD dependent oxidoreductase	FAD_binding_2		_	20	None	2.1	tricarboxylic-acid pathway (citrate cycle, Krebs cycle, TCA cycle)
NCU02573	FAM96B	DUF59		_
NCU07308	fatty acid synthase alpha subunit reductase	Ketoacyl-synt_C, ACPS, ketoacyl-synt, adh_short_C2		_		cel-1	1.06	lipid, fatty acid and isoprenoid metabolism
NCU07307	fatty acid synthase beta subunit dehydratase	zf-MaoC, DUF1729, Acyl_transf_1, MaoC_dehydratas		_		cel-2	1.06	lipid, fatty acid and isoprenoid metabolism
NCU03660	FK506 suppressor Sfk1	Frag1		_	25
NCU10051	flavohemoglobin	FAD_binding_6, Globin, NAD_binding_1		_		fhb-2	1.02	nitrogen, sulfur and selenium metabolism
NCU02096	flavohemoglobin	FAD_binding_6, Globin, NAD_binding_1		_		fhb-1	1.02	nitrogen, sulfur and selenium metabolism
NCU05899	flotillin domain-containing protein	Band_7		_		None	98	CLASSIFICATION NOT YET CLEAR-CUT
NCU08900	FMN binding oxidoreductase	Oxidored_FMN		_		None	1.07	metabolism of vitamins, cofactors, and prosthetic groups
NCU09347	fructose-2,6-bisphosphatase	6PF2K, His_Phos_1		_
NCU07788	fungal specific transcription factor	Fungal_trans, Zn_clus		_		col-26	11.02.03.04	transcriptional control
NCU04596	gamma-cysteine synthetase regulatory subunit	Aldo_ket_red		_		None	01.20.37.01	metabolism of thioredoxin, glutaredoxin, glutathion
NCU04923	Gld1	Aldo_ket_red		_
NCU01080	glucanase B	_	GH64	_		gh64-1	1.05	C-compound and carbohydrate metabolism
NCU05985	glycerol-3-phosphate O-acyltransferase	Acyltransferase		_		chol-6	01.06.02.01	phospholipid metabolism
NCU02727	glycine cleavage system T protein	GCV_T_C, GCV_T		_		None	01.01.09.01.02	degradation of glycine
NCU02475	glycine dehydrogenase	GDC-P, GDC-P		_		gyd-1	01.01.09.01.01	biosynthesis of glycine
NCU05067	golgi transport complex component Cog5	COG5		_
NCU06043	GPR/FUN34 family protein	Grp1_Fun34_YaaH		_
NCU07309	guanine deaminase	Amidohydro_1		_
NCU09602	heat shock protein 70	HSP70		_		hsp70-1	32.01	stress response
NCU02630	heat shock protein 78	ClpB_D2-small, AAA_2, AAA		_		hsp78	14.01	protein folding and stabilization
NCU04963	high-affinity glucose transporter	Sugar_tr		_	32	None	01.05.25	regulation of C-compound and carbohydrate metabolism
NCU08898	homoaconitase	Aconitase_C, Aconitase		_		lys-6	01.01.06.06.01	biosynthesis of lysine
NCU04277	homoserine kinase	GHMP_kinases_C, GHMP_kinases_N		_		thr-4	1.01	amino acid metabolism
NCU04172	hsp70-like protein	Fes1, HEAT_2		_
NCU01294	hydrolase	CN_hydrolase		_		None	14.07	protein modification
NCU01428	hydroxyisourate hydrolase	Transthyretin		_
NCU04867	hypothetical protein	_		_
NCU01923	hypothetical protein	_		_
NCU07235	hypothetical protein	DUF3176		_
NCU09174	hypothetical protein	_		_
NCU05338	hypothetical protein	_		_
NCU00144	hypothetical protein	HLH		_		None	98	CLASSIFICATION NOT YET CLEAR-CUT
NCU02194	hypothetical protein	NACHT		_	17
NCU04502	hypothetical protein	_		_
NCU05922	hypothetical protein	_		_
NCU01538	hypothetical protein	DUF4050		_
NCU11501	hypothetical protein	NAD_binding_8		_
NCU00868	hypothetical protein	_		_
NCU01873	hypothetical protein	_		_	19
NCU01886	hypothetical protein	_		_
NCU11463	hypothetical protein	_		_
NCU04501	hypothetical protein	_		_	20
NCU08137	hypothetical protein	DUF2638		_		None	12.01.01	ribosomal proteins
NCU01926	hypothetical protein	_		_	16
NCU06815	hypothetical protein	zf-RING_2		_		None	40.01.03	directional cell growth (morphogenesis)
NCU02099	hypothetical protein	_		_	19
NCU04268	hypothetical protein	AhpC-TSA_2		_
NCU09108	hypothetical protein	_		_
NCU11574	hypothetical protein	_		_
NCU08476	hypothetical protein	_		_
NCU07491	hypothetical protein	SUR7		_	29
NCU03634	hypothetical protein	_		_
NCU05435	hypothetical protein	RGS		_		None	34.11.03.07	pheromone response, mating-type determination, sex-specific proteins
NCU08288	hypothetical protein	_		_
NCU09629	hypothetical protein	HET		_	25	None	34.11.03.07	pheromone response, mating-type determination, sex-specific proteins
NCU08621	hypothetical protein	RCR		_
NCU11041	hypothetical protein	_		_
NCU06533	hypothetical protein	Mpv17_PMP22		_		None	98	CLASSIFICATION NOT YET CLEAR-CUT
NCU05842	hypothetical protein	Methyltransf_23		_
NCU00357	hypothetical protein	_		_
NCU06233	hypothetical protein	_		_
NCU04774	hypothetical protein	_		_	24
NCU11641	hypothetical protein	_		_
NCU04193	hypothetical protein	Peptidase_M50B, Peptidase_M50B		_
NCU09355	hypothetical protein	_		_
NCU03135	hypothetical protein	Cmc1		_
NCU05351	hypothetical protein	_		_
NCU11331	hypothetical protein	Pkinase		_
NCU01924	hypothetical protein	_		_
NCU03408	hypothetical protein	Abhydrolase_6		_
NCU00867	hypothetical protein	Hemerythrin		_	39
NCU11700	hypothetical protein	_		_
NCU00283	hypothetical protein	_		_
NCU02883	hypothetical protein	_		_	18
NCU08314	hypothetical protein	_		_
NCU08720	hypothetical protein	_		_	19
NCU07016	hypothetical protein	_		_
NCU04006	hypothetical protein	_		_
NCU10052	hypothetical protein	_		_
NCU07942	hypothetical protein	Nop52		_		None	11.04.01	rRNA processing
NCU02182	hypothetical protein	Myb_DNA-binding		_
NCU08784	hypothetical protein	adh_short		_		None	1.05	C-compound and carbohydrate metabolism
NCU04351	hypothetical protein	_		_
NCU11746	hypothetical protein	_		_
NCU05557	hypothetical protein	Dynamin_N		_
NCU10621	hypothetical protein	_		_
NCU01529	hypothetical protein	_		_
NCU08994	hypothetical protein	DUF1640		_
NCU08695	hypothetical protein	DUF2046		_
NCU06425	hypothetical protein	_		_
NCU05900	hypothetical protein	_		_
NCU09336	hypothetical protein	_		_
NCU03208	hypothetical protein	_		_	51
NCU06120	hypothetical protein	DUF1772		_	22
NCU02798	hypothetical protein	FolB		_
NCU05844	hypothetical protein	_		_
NCU04266	hypothetical protein	_		_
NCU00248	hypothetical protein	_		_
NCU11442	hypothetical protein	_		_
NCU09568	hypothetical protein	Fasciclin		_	18	None	98	CLASSIFICATION NOT YET CLEAR-CUT
NCU01872	hypothetical protein	_		_
NCU01844	hypothetical protein	DUF1168		_
NCU04424	hypothetical protein	SNF2_N, SNF2_N, Helicase_C		_	19
NCU02854	hypothetical protein	_		_
NCU05692	hypothetical protein	OHCU_decarbox		_
NCU11787	hypothetical protein	_		_
NCU02191	hypothetical protein	_		_	44
NCU02672	hypothetical protein	_		_
NCU06669	hypothetical protein	DUF3405, DUF3405		_	28
NCU07108	hypothetical protein	_		_	49
NCU05448	hypothetical protein	_		_
NCU05555	hypothetical protein	VWA_2		_
NCU06513	hypothetical protein	_		_
NCU10529	hypothetical protein	_		_
NCU02773	hypothetical protein	DUF3602		_
NCU04249	hypothetical protein	DUF3602		_
NCU08229	hypothetical protein	_		_
NCU03562	hypothetical protein	_		_
NCU11323	hypothetical protein	_		_
NCU07080	hypothetical protein	GFO_IDH_MocA		_	22	None	01.05.25	regulation of C-compound and carbohydrate metabolism
NCU07098	hypothetical protein	Ank_2, Ank_2		_
NCU01748	hypothetical protein	DUF605, WW		_
NCU04493	hypothetical protein	GPI-anchored		_	17
NCU07352	hypothetical protein	_		_
NCU11843	hypothetical protein	_		_
NCU04276	hypothetical protein	_		_
NCU07350	hypothetical protein	Abhydrolase_6		_
NCU11295	hypothetical protein	HLH		_
NCU01871	hypothetical protein	HLH		_
NCU11338	hypothetical protein	_		_
NCU07539	hypothetical protein	_		_
NCU06940	hypothetical protein	_		_
NCU05524	hypothetical protein	_		_
NCU01487	hypothetical protein	DUF3984		_
NCU05755	hypothetical protein	DUF862		_
NCU09354	hypothetical protein	_		_
NCU11920	hypothetical protein	_		_
NCU12049	hypothetical protein	_		_
NCU01922	hypothetical protein	Methyltransf_23		_
NCU08672	hypothetical protein	_		_
NCU08849	hypothetical protein	_		_
NCU06114	hypothetical protein	_		_	17
NCU10270	hypothetical protein	U-box		_
NCU00576	hypothetical protein	_		_
NCU10091	hypothetical protein	_		_		None	34.11.03.07	pheromone response, mating-type determination, sex-specific proteins
NCU00960	hypothetical protein	_		_	17
NCU00358	hypothetical protein	Ins_P5_2-kin		_
NCU08870	hypothetical protein	_		_
NCU07327	hypothetical protein	_		_
NCU08063	hypothetical protein	Zn_clus		_
NCU02575	hypothetical protein	_		_
NCU00247	hypothetical protein	RCR		_
NCU12083	hypothetical protein	_		_	25
NCU00697	hypothetical protein	_		_
NCU08987	hypothetical protein	_		_
NCU04506	hypothetical protein	_		_
NCU06537	hypothetical protein	_		_
NCU12104	hypothetical protein	_		_
NCU11768	hypothetical protein	_		_
NCU09323	hypothetical protein	_		_
NCU09838	hypothetical protein	DUF2305, DUF2305		_
NCU08292	hypothetical protein	MFS_1, MFS_1		_
NCU05722	hypothetical protein	Pkinase		_
NCU03673	hypothetical protein	_		_
NCU04515	hypothetical protein	_		_
NCU01750	hypothetical protein	_		_	24	None	20.03.25	ABC transporters
NCU00980	hypothetical protein	SPT2		_
NCU06331	hypothetical protein	Spo7		_		None	10.03.02	meiosis
NCU08988	hypothetical protein	Methyltransf_23		_
NCU08594	hypothetical protein	Fungal_trans_2, Zn_clus		_
NCU01530	hypothetical protein	_		_
NCU00574	hypothetical protein	_		_
NCU11964	hypothetical protein	_		_
NCU11260	hypothetical protein	_		_
NCU02560	hypothetical protein	_		_
NCU08986	hypothetical protein	_		_
NCU01807	hypothetical protein	_		_
NCU03284	hypothetical protein	_		_
NCU00289	hypothetical protein	Fungal_trans, Zn_clus		_
NCU07074	hypothetical protein	Patatin		_
NCU05691	hypothetical protein	_		_
NCU07316	hypothetical protein	_		_
NCU03070	hypothetical protein	Homeobox		_
NCU02875	hypothetical protein	_		_
NCU04635	hypothetical protein	_		_		None	10.01.05	DNA recombination and DNA repair
NCU02080	hypothetical protein	_		_
NCU09455	hypothetical protein	SnoaL_4		_
NCU06223	hypothetical protein	_		_
NCU08191	hypothetical protein	_		_
NCU08899	hypothetical protein	Fungal_trans		_
NCU09213	hypothetical protein	_		_	18
NCU01298	hypothetical protein	_		_	20	None	42.01	cell wall
NCU09520	hypothetical protein	GAF, HisKA, Response_reg, HATPase_c		_
NCU06427	hypothetical protein	_		_
NCU03117	inosine-5'-monophosphate dehydrogenase IMD2	CBS, CBS, IMPDH		_		gua-1	01.03.01.03	purine nucleotide/nucleoside/nucleobase anabolism
NCU06666	inositol-3-phosphate synthase	NAD_binding_5, Inos-1-P_synth		_		inl	1.05	C-compound and carbohydrate metabolism
NCU03492	inositolphosphorylceramide-B C-26 hydroxylase	FA_hydroxylase, Cyt-b5		_
NCU04265	invertase	Glyco_hydro_32C, Glyco_hydro_32N	CBM38,GH32	CBM38	27	inv	01.05.02.07	sugar, glucoside, polyol and carboxylate catabolism
NCU08707	iron sulfur assembly protein	Fe-S_biosyn		_		None	14.1	assembly of protein complexes
NCU06924	kynurenine 3-monooxygenase	FAD_binding_3		_
NCU05897	l-fucose permease	MFS_1		_	49	None	20.01.03	C-compound and carbohydrate transport
NCU04983	lathosterol oxidase	FA_hydroxylase		_
NCU07081	lipase	Abhydrolase_3		_		None	1.06	lipid, fatty acid and isoprenoid metabolism
NCU10007	malate synthase, variant	Malate_synthase		_		acu-9	1.05	C-compound and carbohydrate metabolism
NCU10007	malate synthase, variant	Malate_synthase		_		acu-9	1.05	C-compound and carbohydrate metabolism
NCU04010	malonyl CoA-acyl carrier protein transacylase	Acyl_transf_1		_	13	None	1.06	lipid, fatty acid and isoprenoid metabolism
NCU07318	mannitol-1-phosphate 5-dehydrogenase	Mannitol_dh, Mannitol_dh_C		_		None	1.05	C-compound and carbohydrate metabolism
NCU06077	membrane transporter	MFS_1		_
NCU06618	metallopeptidase MepB	Peptidase_M3		_
NCU06923	methionine aminopeptidase 1	Peptidase_M24, zf-MYND		_		None	14.07.11	protein processing (proteolytic)
NCU10020	methionine synthase	Meth_synt_2		_
NCU03633	mevalonate kinase	GHMP_kinases_C, GHMP_kinases_N		_		erg-12	01.06.06	isoprenoid metabolism
NCU06167	MFS monocarboxylate transporter	MFS_1, MFS_1		_		None	20.01.03	C-compound and carbohydrate transport
NCU00306	MFS multidrug transporter	MFS_1		_
NCU08738	MFS peptide transporter	PTR2		_		None	20.01.09	peptide transport
NCU09458	MFS transporter	MFS_1		_
NCU10987	MFS transporter Fmp42	MFS_1		_
NCU08326	mitochondrial carrier protein LEU5	Mito_carr, Mito_carr, Mito_carr		_		mic-30	20.01.25	vitamine/cofactor transport
NCU01916	mitochondrial carrier protein RIM2	Mito_carr, Mito_carr, Mito_carr		_		mic-8	20.09.04	mitochondrial transport
NCU10732	mitochondrial dicarboxylate transporter	Mito_carr, Mito_carr, Mito_carr		_		mic-33	20.01.03	C-compound and carbohydrate transport
NCU05196	mitochondrial DnaJ chaperone	DnaJ_C, DnaJ_CXXCXGXG, DnaJ		_		djc-3	32.01	stress response
NCU02623	mitochondrial hypoxia responsive	HIG_1_N		_
NCU05225	mitochondrial NADH dehydrogenase	Pyr_redox_2, efhand, Pyr_redox		_	16	nde-1	02.13.03	aerobic respiration
NCU05593	mitochondrial outer membrane beta-barrel protein	Bac_surface_Ag		_
NCU05390	mitochondrial phosphate carrier protein	Mito_carr, Mito_carr, Mito_carr		_		mic-20	1.04	phosphate metabolism
NCU11744	mitochondrial pyruvate dehydrogenase kinase	BCDHK_Adom3, HATPase_c		_
NCU04307	MSF1	PRELI		_		None	14.04	protein targeting, sorting and translocation
NCU06719	MSF1 domain-containing protein	PRELI		_	29
NCU01422	multiprotein-bridging factor 1	MBF1, HTH_3		_		mbf1	11.02.03.04	transcriptional control
NCU09567	myo-inositol-1(or 4)-monophosphatase	Inositol_P		_		None	1.02	nitrogen, sulfur and selenium metabolism
NCU08048	NAD dehydrogenase	DAO		_
NCU07468	NAD dependent epimerase/dehydratase	Epimerase		_
NCU06518	NADH-cytochrome b5 reductase 2	FAD_binding_6, NAD_binding_1		_		None	02.13.03	aerobic respiration
NCU03651	NADP-dependent malic enzyme	Malic_M, malic		_
NCU04720	nitrite reductase	NIR_SIR, Pyr_redox_2, NIR_SIR_ferr, Fer2_BFD, Pyr_redox, Rieske		_
NCU07817	non-anchored cell wall protein 3	Carb_bind	CBM52	CBM52	21
NCU00716	non-anchored cell wall protein 5	_		_	16
NCU03145	oxidative stress resistance	Cation_efflux		_	29
NCU00520	oxidoreductase	Ofd1_CTDD, 2OG-FeII_Oxy_3		_
NCU04591	pentachlorophenol monooxygenase	FAD_binding_3		_
NCU08674	pentatricopeptide repeat protein	PPR_3, PPR_2, PPR		_
NCU03381	phosphatidate cytidylyltransferase	CTP_transf_1		_
NCU09873	phosphoenolpyruvate carboxykinase	PEPCK_ATP		_
NCU01845	phosphoglycerate mutase family domain-containing	His_Phos_1		_
NCU06123	phosphoketolase	XFP_C, XFP_N, XFP		_		None	1.05	C-compound and carbohydrate metabolism
NCU03584	polyketide synthase	Ketoacyl-synt_C, PP-binding, PP-binding, Acyl_transf_1, Thioesterase, ketoacyl-synt		_
NCU04473	polysaccharide export protein	CAP59_mtransfer	GT69	_	35	gt69-1	32.05.05	virulence, disease factors
NCU06524	protease inhibitor	PBP		_	21	None	16.09	lipid binding
NCU08985	protein tyrosine phosphatase	PTPLA		_	31	None	10.03	cell cycle
NCU01882	purine transporter	Xan_ur_permease, Xan_ur_permease		_
NCU02193	pyruvate decarboxylase, variant	TPP_enzyme_C, TPP_enzyme_N, TPP_enzyme_M		_		cfp	02.16.01	alcohol fermentation
NCU02193	pyruvate decarboxylase, variant	TPP_enzyme_C, TPP_enzyme_N, TPP_enzyme_M		_		cfp	02.16.01	alcohol fermentation
NCU04503	ribosome biogenesis protein Ssf2	Brix		_		None	34.11.03.07	pheromone response, mating-type determination, sex-specific proteins
NCU09077	Rpr2 domain-containing protein	Rpr2		_
NCU05805	serine hydroxymethyltransferase	SHMT		_		cbs-2	1.01	amino acid metabolism
NCU03659	serine/threonine-protein kinase	Pkinase		_		prk-3	10.03.01	mitotic cell cycle and cell cycle control
NCU03197	serine/threonine-protein kinase psk1	Pkinase		_		stk-11	14.07.03	modification by phosphorylation, dephosphorylation, autophosphorylation
NCU07768	short-chain dehydrogenase/reductase SDR	adh_short		_
NCU06943	SIK1	NOSIC, NOP5NT, Nop		_	23	rbg-17	11.02.01	rRNA synthesis
NCU03732	SIS1	DnaJ_C, DnaJ		_		None	12.04	translation
NCU03889	SNARE	_		_		None	20.09.07.05	intra Golgi transport
NCU08280	squalene epoxidase	SE, DAO		_		erg-7	01.06.06.11	tetracyclic and pentacyclic triterpenes (cholesterin, steroids and hopanoids) metabolism
NCU07693	stu-1	CLASP_N, CLASP_N		_
NCU06949	subtilisin-like proteinase Mp1	Inhibitor_I9, Peptidase_S8		_	23	spr-6	14.13	protein/peptide degradation
NCU07851	superoxide dismutase 1 copper chaperone	Sod_Cu, HMA		_	23
NCU07221	two-component system protein A	PAS_9, HisKA, Response_reg, HATPase_c		_
NCU03333	tyrosine phosphatase	Y_phosphatase2		_
NCU02549	ubiquinol-cytochrome-c reductase subunit beta	Peptidase_M16_C, Peptidase_M16		_		pep	14.07.11	protein processing (proteolytic)
NCU01180	ubiquitin C-terminal hydrolase	UCH_1		_
NCU08378	ubiquitin C-terminal hydrolase CreB	UCH		_
NCU05582	ubiquitin fusion degradation protein	UFD1		_		None	01.05.25	regulation of C-compound and carbohydrate metabolism
NCU00595	ubiquitin thiolesterase	Peptidase_C65		_
NCU05133	udp-glucose 4-epimerase	Epimerase_Csub, Epimerase		_		None	1.05	C-compound and carbohydrate metabolism
NCU09777	UPF0075 domain-containing protein	UPF0075		_	18
NCU07853	uricase	Uricase, Uricase		_		None	01.03.01.01	purine nucleotide /nucleoside/nucleobase catabolism
NCU05542	xanthine phosphoribosyltransferase 1	Pribosyltran		_		None	01.03.01	purin nucleotide/nucleoside/nucleobase metabolism
NCU08507	zinc finger protein zpr1	zf-ZPR1, zf-ZPR1		_		None	16.01	protein binding
NCU06782	zinc metalloproteinase	WLM		_

## Sheet: Funcat_237 genes
order	Funcat	Category	237	P-value	NCUs
1	1	METABOLISM	84	7.41426e-14	NCU00130 NCU00206 NCU00710 NCU00762 NCU00836 NCU00890 NCU00891 NCU01050 NCU01059 NCU01195 NCU01353 NCU01633 NCU01692 NCU01704 NCU01866 NCU01906 NCU02059 NCU02097 NCU02240 NCU02343 NCU02855 NCU02916 NCU03607 NCU03639 NCU03756 NCU03813 NCU03963 NCU04168 NCU04292 NCU04400 NCU04401 NCU04475 NCU04537 NCU04791 NCU04854 NCU04856 NCU04870 NCU05057 NCU05159 NCU05548 NCU05591 NCU05751 NCU05848 NCU05924 NCU…
2	1.01	amino acid metabolism	12	0.0452574	NCU01195 NCU01692 NCU03607 NCU03756 NCU04292 NCU04856 NCU05548 NCU06724 NCU07143 NCU08044 NCU08411 NCU10110
3	01.01.03	assimilation of ammonia, metabolism of the glutamate group	5	0.0143651	NCU01195 NCU01692 NCU04856 NCU06724 NCU08411
4	01.01.03.01	metabolism of glutamine	3	0.00410236	NCU01195 NCU04856 NCU06724
5	01.01.03.01.01	biosynthesis of glutamine	2	0.00548462	NCU04856 NCU06724
6	01.01.03.01.02	degradation of glutamine	1	0.196735	NCU01195
7	01.01.03.02	metabolism of glutamate	5	0.00121083	NCU01195 NCU01692 NCU04856 NCU06724 NCU08411
8	01.01.03.02.01	biosynthesis of glutamate	5	0.000144944	NCU01195 NCU01692 NCU04856 NCU06724 NCU08411
9	01.01.03.02.02	degradation of glutamate	2	0.049181	NCU01195 NCU08411
10	01.01.03.03	metabolism of proline	1	0.216061	NCU01195
11	01.01.03.03.01	biosynthesis of proline	0	1
12	01.01.03.03.02	degradation of proline	1	0.0703999	NCU01195
13	01.01.03.04	metabolism of -hydroxyproline	0	1
14	01.01.03.04.01	biosynthesis of -hydroxyproline	0	1
15	01.01.03.04.02	degradation of -hydroxyproline	0	1
16	01.01.03.05	metabolism of arginine	1	0.370431	NCU01195
17	01.01.03.05.01	biosynthesis of arginine	0	1
18	01.01.03.05.02	degradation of arginine	1	0.156648	NCU01195
19	01.01.05	metabolism of urea cycle, creatine and polyamines	0	1
20	01.01.05.01	metabolism of polyamines	0	1
21	01.01.05.01.01	biosynthesis of polyamines	0	1
22	01.01.05.01.02	degradation of polyamines	0	1
23	01.01.05.02	metabolism of creatine	0	1
24	01.01.05.02.01	biosynthesis of creatine	0	1
25	01.01.05.02.02	degradation of creatine	0	1
26	01.01.05.03	metabolism of urea (urea cycle)	0	1
27	01.01.06	metabolism of the aspartate family	2	0.504684	NCU03607 NCU08411
28	01.01.06.01	metabolism of aspartate	1	0.196735	NCU08411
29	01.01.06.01.01	biosynthesis of aspartate	1	0.135863	NCU08411
30	01.01.06.01.02	degradation of aspartate	1	0.135863	NCU08411
31	01.01.06.02	metabolism of asparagine	1	0.114569	NCU08411
32	01.01.06.02.01	biosynthesis of asparagine	1	0.092752	NCU08411
33	01.01.06.02.02	degradation of asparagine	0	1
34	01.01.06.04	metabolism of threonine	1	0.234924	NCU03607
35	01.01.06.04.01	biosynthesis of threonine	1	0.114569	NCU03607
36	01.01.06.04.02	degradation of threonine	1	0.135863	NCU03607
37	01.01.06.05	metabolism of methionine	0	1
38	01.01.06.05.01	biosynthesis of methionine	0	1
39	01.01.06.05.01.01	biosynthesis of homocysteine	0	1
40	01.01.06.05.01.02	degradation of homocysteine	0	1
41	01.01.06.05.02	degradation of methionine	0	1
42	01.01.06.06	metabolism of lysine	0	1
43	01.01.06.06.01	biosynthesis of lysine	0	1
44	01.01.06.06.01.01	diaminopimelic acid pathway	0	1
45	01.01.06.06.01.03	aminoadipic acid pathway	0	1
46	01.01.06.06.02	degradation of lysine	0	1
47	01.01.09	metabolism of the cysteine - aromatic group	3	0.433063	NCU03607 NCU05548 NCU08044
48	01.01.09.01	metabolism of glycine	1	0.271305	NCU03607
49	01.01.09.01.01	biosynthesis of glycine	1	0.196735	NCU03607
50	01.01.09.01.02	degradation of glycine	1	0.176934	NCU03607
51	01.01.09.02	metabolism of serine	2	0.0617459	NCU03607 NCU08044
52	01.01.09.02.01	biosynthesis of serine	1	0.176934	NCU03607
53	01.01.09.02.02	degradation of serine	1	0.0703999	NCU03607
54	01.01.09.03	metabolism of cysteine	0	1
55	01.01.09.03.01	biosynthesis of cysteine	0	1
56	01.01.09.03.02	degradation of cysteine	0	1
57	01.01.09.04	metabolism of phenylalanine	0	1
58	01.01.09.04.01	biosynthesis of phenylalanine	0	1
59	01.01.09.04.02	degradation of phenylalanine	0	1
60	01.01.09.05	metabolism of tyrosine	0	1
61	01.01.09.05.01	biosynthesis of tyrosine	0	1
62	01.01.09.05.02	degradation of tyrosine	0	1
63	01.01.09.06	metabolism of tryptophan	0	1
64	01.01.09.06.01	biosynthesis of tryptophan	0	1
65	01.01.09.06.02	degradation of tryptophan	0	1
66	01.01.09.07	metabolism of histidine	0	1
67	01.01.09.07.01	biosynthesis of histidine	0	1
68	01.01.09.07.02	degradation of histidine	0	1
69	01.01.11	metabolism of the pyruvate family (alanine, isoleucine, leucine, valine) and D-alanine	3	0.0750121	NCU03607 NCU04292 NCU10110
70	01.01.11.01	metabolism of alanine	0	1
71	01.01.11.01.01	biosynthesis of alanine	0	1
72	01.01.11.01.02	degradation of alanine	0	1
73	01.01.11.02	metabolism of isoleucine	1	0.338979	NCU04292
74	01.01.11.02.01	biosynthesis of isoleucine	1	0.253335	NCU04292
75	01.01.11.02.02	degradation of isoleucine	1	0.114569	NCU04292
76	01.01.11.03	metabolism of valine	2	0.0553367	NCU04292 NCU10110
77	01.01.11.03.01	biosynthesis of valine	1	0.216061	NCU04292
78	01.01.11.03.02	degradation of valine	2	0.011157	NCU04292 NCU10110
79	01.01.11.04	metabolism of leucine	1	0.370431	NCU04292
80	01.01.11.04.01	biosynthesis of leucine	1	0.234924	NCU04292
81	01.01.11.04.02	degradation of leucine	1	0.234924	NCU04292
82	01.01.11.06	metabolism of the D-alanine amino acid group	0	1
83	01.01.11.07	metabolism of the hydroxyamino acid group	1	0.0240375	NCU03607
84	01.01.13	regulation of amino acid metabolism	1	0.354896	NCU03756
85	1.02	nitrogen, sulfur and selenium metabolism	5	0.2032	NCU01195 NCU04292 NCU04856 NCU06724 NCU08411
86	01.02.02	nitrogen metabolism	1	0.469229	NCU04292
87	01.02.02.01	nitrogen fixation	0	1
88	01.02.02.02	nitrate assimilation	0	1
89	01.02.02.03	nitrate dissimilation	0	1
90	01.02.02.05	ammonium nitrification	0	1
91	01.02.02.06	assimilation of ammonia	0	1
92	01.02.02.07	nitric oxide biosynthesis	0	1
93	01.02.02.09	catabolism of nitrogenous compounds	0	1
94	01.02.02.09.01	urea catabolism (not urea cycle)	0	1
95	01.02.02.09.03	urate catabolism	0	1
96	01.02.02.09.05	cyanate catabolism	0	1
97	01.02.02.09.06	anthranilate catabolism	0	1
98	01.02.02.09.07	formamide catabolism	0	1
99	01.02.02.09.08	nitriles catabolism	0	1
100	01.02.03	sulfur metabolism	0	1
101	01.02.03.01	sulfate assimilation	0	1
102	01.02.03.03	assimilatory reduction of sulfur	0	1
103	01.02.03.04	conjunction of sulfate	0	1
104	01.02.03.05	oxidation of sulfur to sulfate, electron as energy source	0	1
105	01.02.03.06	sulfate dissimilation, anaerobic respiration, sulfate respiration	0	1
106	01.02.05	selenium metabolism	0	1
107	01.02.07	regulation of nitrogen, sulfur and selenium metabolism	0	1
108	01.02.07.01	regulation of nitrogen metabolism	0	1
109	01.02.07.03	regulation of sulphur metabolism	0	1
110	01.02.07.05	regulation of selenium metabolism	0	1
111	1.03	nucleotide/nucleoside/nucleobase metabolism	1	0.993692	NCU03963
112	01.03.01	purin nucleotide/nucleoside/nucleobase metabolism	1	0.915432	NCU03963
113	01.03.01.01	purine nucleotide /nucleoside/nucleobase catabolism	0	1
114	01.03.01.01.01	hypoxanthine catabolism	0	1
115	01.03.01.01.03	xanthine catabolism	0	1
116	01.03.01.03	purine nucleotide/nucleoside/nucleobase anabolism	0	1
117	01.03.04	pyrimidine nucleotide/nucleoside/nucleobase metabolism	0	1
118	01.03.04.01	pyrimidine nucleotide/nucleoside/nucleobase catabolism	0	1
119	01.03.04.03	pyrimidine nucleotide/nucleoside/nucleobase anabolism	0	1
120	01.03.07	deoxyribonucleotide metabolism	0	1
121	01.03.10	metabolism of cyclic and unusual nucleotides	0	1
122	01.03.13	regulation of nucleotide/nucleoside/nucleobase metabolism	0	1
123	01.03.16	polynucleotide degradation	0	1
124	01.03.16.01	RNA degradation	0	1
125	01.03.16.03	DNA degradation	0	1
126	1.04	phosphate metabolism	7	0.450445	NCU03963 NCU04400 NCU05591 NCU07546 NCU08687 NCU10009 NCU11353
127	01.04.04	regulation of phosphate metabolism	0	1
128	1.05	C-compound and carbohydrate metabolism	69	1.2847e-25	NCU00130 NCU00206 NCU00710 NCU00762 NCU00836 NCU00890 NCU00891 NCU01050 NCU01059 NCU01353 NCU01633 NCU01692 NCU01704 NCU01866 NCU01906 NCU02097 NCU02240 NCU02343 NCU02855 NCU02916 NCU03813 NCU03963 NCU04168 NCU04400 NCU04401 NCU04537 NCU04791 NCU04854 NCU04870 NCU05057 NCU05159 NCU05548 NCU05591 NCU05751 NCU05848 NCU05924 NCU05955 NCU06142 NCU07190 NCU07253 NCU07277 NCU07340 NCU07487 NCU07737 NCU…
129	01.05.02	sugar, glucoside, polyol and carboxylate metabolism	19	1.58622e-09	NCU00130 NCU00836 NCU00891 NCU01050 NCU01692 NCU01906 NCU02240 NCU02855 NCU02916 NCU07190 NCU07898 NCU08384 NCU08687 NCU08755 NCU08760 NCU09652 NCU09680 NCU09705 NCU11353
130	01.05.02.01	nucleotide-sugar metabolism	0	1
131	01.05.02.04	sugar, glucoside, polyol and carboxylate anabolism	4	0.0452088	NCU00130 NCU00891 NCU01692 NCU08687
132	01.05.02.07	sugar, glucoside, polyol and carboxylate catabolism	18	3.4817e-10	NCU00130 NCU00836 NCU00891 NCU01050 NCU01692 NCU01906 NCU02240 NCU02855 NCU02916 NCU07190 NCU07898 NCU08384 NCU08687 NCU08755 NCU08760 NCU09652 NCU09680 NCU11353
133	01.05.03	polysaccharide metabolism	37	7.67787e-27	NCU00130 NCU00206 NCU00710 NCU00836 NCU00890 NCU01050 NCU01059 NCU01906 NCU02240 NCU02343 NCU02916 NCU03963 NCU04168 NCU04854 NCU04870 NCU05057 NCU05159 NCU05751 NCU05924 NCU05955 NCU07190 NCU07253 NCU07277 NCU07340 NCU07487 NCU07760 NCU07898 NCU08176 NCU08189 NCU08384 NCU08755 NCU08760 NCU09425 NCU09582 NCU09652 NCU09664 NCU09680
134	01.05.03.01	glycogen metabolism	0	1
135	01.05.03.01.04	glycogen anabolism	0	1
136	01.05.03.01.07	glycogen catabolism	0	1
137	01.05.03.02	peptidoglycan metabolism	0	1
138	01.05.03.02.04	peptidoglycan anabolism	0	1
139	01.05.03.02.07	peptidoglycan catabolism	0	1
140	01.05.03.03	chitin metabolism	0	1
141	01.05.03.03.04	chitin anabolism	0	1
142	01.05.03.03.07	chitin catabolism	0	1
143	01.05.03.04	starch metabolism	0	1
144	01.05.03.04.04	starch anabolism	0	1
145	01.05.03.04.07	starch catabolism	0	1
146	01.05.05	C- compound metabolism	1	0.216061	NCU03813
147	01.05.05.04	C- compound anabolism	0	1
148	01.05.05.07	C- compound catabolism	1	0.196735	NCU03813
149	01.05.05.07.01	serine-isocitrate lyase pathway	0	1
150	01.05.05.07.03	ribulose-monophosphate cycle	0	1
151	01.05.06	C- compound and organic acid metabolism	1	0.400393	NCU01692
152	01.05.06.04	C- compound and organic acid anabolism	0	1
153	01.05.06.07	C- compound and organic acid catabolism	1	0.385594	NCU01692
154	01.05.07	C- compound metabolism	1	0.114569	NCU04400
155	01.05.07.04	C- compound anabolism	0	1
156	01.05.07.07	C- compound catabolism	0	1
157	01.05.08	C- compound metabolism	0	1
158	01.05.08.04	C- compound anabolism	0	1
159	01.05.08.07	C- compound catabolism	0	1
160	01.05.09	aminosaccharide metabolism	0	1
161	01.05.09.04	aminosaccharide anabolism	0	1
162	01.05.09.07	aminosaccharide catabolism	0	1
163	01.05.10	aliphatic hydrocarbon metabolism	0	1
164	01.05.10.04	aliphatic hydrocarbon anabolism	0	1
165	01.05.10.07	aliphatic hydrocarbon catabolism	0	1
166	01.05.11	aromate metabolism	2	0.249841	NCU01704 NCU05548
167	01.05.11.04	aromate anabolism	1	0.196735	NCU05548
168	01.05.11.07	aromate catabolism	0	1
169	01.05.11.07.01	aerobic aromate catabolism	0	1
170	01.05.11.07.01.01	ortho-cleavage	0	1
171	01.05.11.07.01.03	meta-cleavage	0	1
172	01.05.11.07.02	anaerobic aromate catabolism	0	1
173	01.05.12	autotrophic CO-fixation	0	1
174	01.05.12.01	Calvin cycle	0	1
175	01.05.12.03	reductive TCA cycle	0	1
176	01.05.12.05	hydroxypropionate pathway	0	1
177	01.05.12.07	acetyl-CoA pathway	0	1
178	01.05.13	transfer of activated C- groups	0	1
179	01.05.13.01	S-adenosyl-methionine - homocysteine cycle	0	1
180	01.05.13.03	tetrahydrofolate-dependent C--transfer	0	1
181	01.05.25	regulation of C-compound and carbohydrate metabolism	4	0.130394	NCU01633 NCU04537 NCU08687 NCU10021
182	1.06	lipid, fatty acid and isoprenoid metabolism	9	0.5006	NCU01906 NCU03639 NCU04400 NCU04475 NCU07055 NCU07224 NCU08044 NCU08164 NCU08384
183	01.06.02	membrane lipid metabolism	1	0.682184	NCU04475
184	01.06.02.01	phospholipid metabolism	1	0.594212	NCU04475
185	01.06.02.02	glycolipid metabolism	0	1
186	01.06.02.03	sphingolipid metabolism	0	1
187	01.06.05	fatty acid metabolism	0	1
188	01.06.06	isoprenoid metabolism	2	0.497031	NCU01906 NCU08384
189	01.06.06.01	hemiterpenes metabolism	0	1
190	01.06.06.03	monoterpenes metabolism	0	1
191	01.06.06.05	sesquiterpenes metabolism	0	1
192	01.06.06.07	diterpenes metabolism	0	1
193	01.06.06.09	triterpenes metabolism	0	1
194	01.06.06.11	tetracyclic and pentacyclic triterpenes (cholesterin, steroids and hopanoids) metabolism	2	0.312509	NCU01906 NCU08384
195	01.06.06.13	tetraterpenes (carotinoids) metabolism	0	1
196	01.06.06.15	polyterpenes metabolism	0	1
197	01.06.10	regulation of lipid, fatty acid and isoprenoid metabolism	0	1
198	1.07	metabolism of vitamins, cofactors, and prosthetic groups	6	0.19874	NCU00891 NCU01704 NCU01906 NCU03813 NCU08164 NCU08384
199	01.07.01	biosynthesis of vitamins, cofactors, and prosthetic groups	0	1
200	01.07.03	catabolism of vitamins, cofactors, and prosthetic groups	0	1
201	01.07.04	utilization of vitamins, cofactors, and prosthetic groups	1	0.092752	NCU01704
202	01.07.07	regulation of the metabolism of vitamins, cofactors, and prosthetic groups	0	1
203	1.08	metabolism of intercellular mediators	0	1
204	01.08.01	metabolism of neurotransmitters	0	1
205	01.08.02	metabolism of hormones	0	1
206	01.08.03	metabolism of cytokines and growth factors	0	1
207	01.08.04	regulation of the metabolism of intercellular mediators	0	1
208	1.2	secondary metabolism	7	0.0659538	NCU00130 NCU00891 NCU01906 NCU03607 NCU04791 NCU05548 NCU08384
209	01.20.01	metabolism of primary metabolic sugar derivatives	2	0.0376963	NCU00130 NCU00891
210	01.20.01.01	metabolism of secondary monosaccharides	1	0.0703999	NCU00891
211	01.20.01.03	metabolism of sugar carboxylic acids	0	1
212	01.20.01.05	metabolism of sugar alcohols	0	1
213	01.20.01.07	metabolism of glycosides	1	0.0474996	NCU00130
214	01.20.01.09	metabolism of aminoglycoside antibiotics	0	1
215	01.20.03	metabolism of derivatives of intermediates of glucose degradation	0	1
216	01.20.05	metabolism of acetic acid derivatives	0	1
217	01.20.05.01	metabolism of acetoacetate, acetone, hydroxybutyric acid	0	1
218	01.20.05.03	metabolism of alkanes, alkenes, alkanals, alkanols	0	1
219	01.20.05.05	metabolism of fatty acid esters	0	1
220	01.20.05.07	metabolism of acetylenes	0	1
221	01.20.05.09	metabolism of eicosanoids	0	1
222	01.20.05.11	metabolism of polyketides	0	1
223	01.20.07	metabolism of propionic acid derivatives	0	1
224	01.20.09	metabolism of derivatives of intermediates of the TCA and glyoxylate pathway	0	1
225	01.20.13	metabolism of derivatives of homoisopentenyl pyrophosphate	0	1
226	01.20.15	metabolism of derivatives of dehydroquinic acid, shikimic acid and chorismic acid	1	0.354896	NCU05548
227	01.20.15.01	metabolism of naphthoquinone, anthraquinone	0	1
228	01.20.15.03	metabolism of ubiquinone	0	1
229	01.20.17	metabolism of secondary products derived from primary amino acids	3	0.0547526	NCU01906 NCU04791 NCU08384
230	01.20.17.01	metabolism of nonprotein amino acids	0	1
231	01.20.17.03	metabolism of amines	0	1
232	01.20.17.05	metabolism of cyanogenic glycosides	0	1
233	01.20.17.07	metabolism of glycosinolates and derivatives	0	1
234	01.20.17.09	metabolism of alkaloids	3	0.00503781	NCU01906 NCU04791 NCU08384
235	01.20.19	metabolism of secondary products derived from glycine, L-serine and L-alanine	0	1
236	01.20.19.01	metabolism of porphyrins	0	1
237	01.20.19.03	metabolism of open-chain tetrapyrrols	0	1
238	01.20.19.05	metabolism of cobalamins	0	1
239	01.20.21	metabolism of sulfuric acid and L-cysteine derivatives	0	1
240	01.20.23	metabolism of secondary products derived from L-methionine	0	1
241	01.20.25	metabolism of secondary products derived from L-valin, L-leucin and L-isoleucin	0	1
242	01.20.27	metabolism of secondary products derived from L-aspartic acid and L-threonine	1	0.0240375	NCU03607
243	01.20.29	metabolism of secondary products derived from L-glutamic acid, L-proline and L-ornithine	0	1
244	01.20.31	metabolism of secondary products derived from L-lysine, L-arginine and L-histidine	0	1
245	01.20.33	metabolism of secondary products derived from L-tryptophan	0	1
246	01.20.35	metabolism of secondary products derived from L-phenylalanine and L-tyrosine	0	1
247	01.20.35.01	metabolism of phenylpropanoids	0	1
248	01.20.35.01.01	metabolism of melanins	0	1
249	01.20.35.01.03	metabolism of lignins	0	1
250	01.20.35.01.05	metabolism of stilbenes, flavonoids	0	1
251	01.20.35.01.07	metabolism of coumarins	0	1
252	01.20.35.01.09	metabolism of cinnamic acids	0	1
253	01.20.35.02	metabolism of thyroids	0	1
254	01.20.35.03	metabolism of catecholamines	0	1
255	01.20.36	non-ribosomal peptide synthesis	0	1
256	01.20.37	metabolism of peptide derived compounds	0	1
257	01.20.37.01	metabolism of thioredoxin, glutaredoxin, glutathion	0	1
258	01.20.37.03	metabolism of peptide antibiotics	0	1
259	01.20.37.05	metabolism of beta-lactams	0	1
260	01.20.38	metabolism of toxins/drugs	0	1
261	01.20.70	regulation of secondary metabolism	0	1
262	1.25	extracellular metabolism	6	0.000225309	NCU00710 NCU02059 NCU04870 NCU05955 NCU07760 NCU08176
263	01.25.01	extracellular polysaccharide degradation	3	0.00856782	NCU05955 NCU07760 NCU08176
264	01.25.03	extracellular protein degradation	1	0.092752	NCU02059
265	01.25.05	extracellular polynucleotide degradation	0	1
266	01.25.07	extracellular ester compound degradation	2	0.00334371	NCU00710 NCU04870
267	01.25.09	extracellular lignin degradation	0	1
268	01.25.11	extracellular aminosaccharide degradation	0	1
269	2	ENERGY	10	0.298678	NCU00130 NCU01195 NCU01692 NCU01906 NCU03813 NCU04401 NCU06142 NCU08384 NCU08398 NCU10107
270	2.01	glycolysis and gluconeogenesis	3	0.180667	NCU00130 NCU04401 NCU08398
271	02.01.01	glycolysis methylglyoxal bypass	0	1
272	02.01.03	regulation of glycolysis and gluconeogenesis	0	1
273	2.04	glyoxylate cycle	0	1
274	2.05	Entner-Doudoroff pathway	0	1
275	2.07	pentose-phosphate pathway	3	0.0375859	NCU04401 NCU06142 NCU10107
276	02.07.01	pentose-phosphate pathway oxidative branch	0	1
277	02.07.03	pentose-phosphate pathway non oxidative branch	1	0.114569	NCU10107
278	02.07.05	regulation of pentose-phosphate pathway	0	1
279	2.08	pyruvate dehydrogenase complex	0	1
280	2.09	anaplerotic reactions	0	1
281	2.1	tricarboxylic-acid pathway (citrate cycle, Krebs cycle, TCA cycle)	0	1
282	2.11	electron transport and membrane-associated energy conservation	0	1
283	02.11.05	accessory proteins of electron transport and membrane-associated energy conservation	0	1
284	02.11.07	regulation of electron transport and membrane-associated energy conservation	0	1
285	2.13	respiration	0	1
286	02.13.01	anaerobic respiration	0	1
287	02.13.03	aerobic respiration	0	1
288	02.13.05	regulation of respiration	0	1
289	2.16	fermentation	3	0.139979	NCU01906 NCU03813 NCU08384
290	02.16.01	alcohol fermentation	0	1
291	02.16.01.01	bacterial type ethanol fermentation	0	1
292	02.16.03	lactate fermentation	0	1
293	02.16.03.01	homofermentative pathway	0	1
294	02.16.03.03	heterofermentative pathway and fermentaton of other saccharides	0	1
295	02.16.03.05	bifidum pathway	0	1
296	02.16.03.07	malo-lactate fermentation	0	1
297	02.16.05	butyrate and butanol-acetoine fermentation	0	1
298	02.16.07	ethanol-acetate fermentation	0	1
299	02.16.09	mixed acid and butanediol fermentation	0	1
300	02.16.11	propionate fermentation	0	1
301	02.16.11.01	acrylate pathway	0	1
302	02.16.11.03	succinate-propionate pathway	0	1
303	02.16.13	acetate fermentation	0	1
304	02.16.15	methane fermentation	0	1
305	02.16.17	fermentation of nitrogenous compounds	0	1
306	02.16.17.01	single amino acid fermentations	0	1
307	02.16.17.03	stickland reactions	0	1
308	02.16.17.05	fermentation of heterocyclic compounds	0	1
309	02.16.20	regulation of fermentation	0	1
310	2.17	chemolithotrophy (egsulfide, nitrogenous compounds)	0	1
311	2.19	metabolism of energy reserves (egglycogen, trehalose)	0	1
312	2.25	oxidation of fatty acids	0	1
313	2.3	photosynthesis	0	1
314	02.30.01	anoxygenic photosynthesis	0	1
315	02.30.03	oxygenic photosynthesis	0	1
316	02.30.07	accessory proteins of photosynthetic electron transport	0	1
317	02.30.10	regulation of photosynthesis	0	1
318	2.45	energy conversion and regeneration	0	1
319	02.45.01	bioluminescence	0	1
320	02.45.03	light absorption	0	1
321	02.45.07	heat production	0	1
322	02.45.11	conversion to kinetic energy (egmovement)	0	1
323	02.45.15	energy generation (egATP synthase)	0	1
324	02.45.20	regulation of energy conversion / regeneration	0	1
325	4	STORAGE PROTEIN	0	1
326	4.01	storage facilitating proteins	0	1
327	4.02	stored proteins	0	1
328	10	CELL CYCLE AND DNA PROCESSING	3	0.999883	NCU02668 NCU04292 NCU08115
329	10.01	DNA processing	1	0.99935	NCU08115
330	10.01.01	cellular DNA uptake	0	1
331	10.01.01.01	bacterial competence	0	1
332	10.01.01.03	conjugational DNA transfer	0	1
333	10.01.02	DNA topology	0	1
334	10.01.03	DNA synthesis and replication	0	1
335	10.01.03.03	ori recognition and priming complex formation	0	1
336	10.01.03.05	extension/ polymerization activity	0	1
337	10.01.05	DNA recombination and DNA repair	1	0.982122	NCU08115
338	10.01.05.01	DNA repair	1	0.962482	NCU08115
339	10.01.05.03	DNA recombination	0	1
340	10.01.05.03.01	meiotic recombination	0	1
341	10.01.05.03.03	somatic / mitotic recombination	0	1
342	10.01.05.03.05	DNA integration	0	1
343	10.01.09	DNA restriction or modification	0	1
344	10.01.09.01	DNA methylation	0	1
345	10.01.09.03	DNA restriction	0	1
346	10.01.09.05	DNA conformation modification (egchromatin)	0	1
347	10.01.09.07	DNA imprinting and other epigenetic effects	0	1
348	10.01.11	regulation of DNA processing	0	1
349	10.03	cell cycle	2	0.998611	NCU02668 NCU04292
350	10.03.01	mitotic cell cycle and cell cycle control	2	0.988335	NCU02668 NCU04292
351	10.03.01.01	mitotic cell cycle	1	0.901994	NCU04292
352	10.03.01.01.01	G phase of mitotic cell cycle	0	1
353	10.03.01.01.02	G/G transition, mitotic exit	0	1
354	10.03.01.01.03	G/S transition of mitotic cell cycle	1	0.494507	NCU04292
355	10.03.01.01.05	S phase of mitotic cell cycle	0	1
356	10.03.01.01.07	G phase of mitotic cell cycle	0	1
357	10.03.01.01.09	G/M transition of mitotic cell cycle	0	1
358	10.03.01.01.11	M phase	0	1
359	10.03.01.01.13	M/G transition of mitotic cell cycle	0	1
360	10.03.01.02	cell cycle arrest	0	1
361	10.03.01.03	cell cycle checkpoints (checkpoints of morphogenesis, DNA-damage,-replication, mitotic phase and spindle)	0	1
362	10.03.02	meiosis	0	1
363	10.03.02.01	meiosis I	0	1
364	10.03.02.03	meiosis II	0	1
365	10.03.03	cytokinesis (cell division) /septum formation and hydrolysis	0	1
366	10.03.04	nuclear and chromosomal cycle	0	1
367	10.03.04.01	centromere/kinetochore complex maturation	0	1
368	10.03.04.03	chromosome condensation	0	1
369	10.03.04.05	chromosome segregation/division	0	1
370	10.03.04.06	chromosome inactivation	0	1
371	10.03.04.07	nuclear division	0	1
372	10.03.04.09	nuclear migration	0	1
373	10.03.05	cell cycle dependent cytoskeleton reorganization	0	1
374	10.03.05.01	spindle pole body/centrosome and microtubule cycle	0	1
375	10.03.05.03	cell cycle dependent actin filament reorganization	0	1
376	11	TRANSCRIPTION	2	0.999998	NCU08042 NCU08687
377	11.02	RNA synthesis	2	0.999898	NCU08042 NCU08687
378	11.02.01	rRNA synthesis	0	1
379	11.02.02	tRNA synthesis	0	1
380	11.02.03	mRNA synthesis	2	0.999596	NCU08042 NCU08687
381	11.02.03.01	general transcription activities	0	1
382	11.02.03.01.01	transcription initiation	0	1
383	11.02.03.01.04	transcription elongation	0	1
384	11.02.03.01.07	transcription termination	0	1
385	11.02.03.04	transcriptional control	2	0.996271	NCU08042 NCU08687
386	11.02.03.04.01	transcription activation	1	0.530193	NCU08042
387	11.02.03.04.03	transcription repression	0	1
388	11.02.03.04.05	enhancer/silencer interaction	0	1
389	11.02.03.04.07	posttranscriptional control	0	1
390	11.04	RNA processing	0	1
391	11.04.01	rRNA processing	0	1
392	11.04.02	tRNA processing	0	1
393	11.04.03	mRNA processing (splicing, '-, '-end processing)	0	1
394	11.04.03.01	splicing	0	1
395	11.04.03.01.10	regulation of splicing	0	1
396	11.04.03.03	'-end processing	0	1
397	11.04.03.05	'-end processing	0	1
398	11.04.03.11	control of mRNA stability	0	1
399	11.04.05	RNA topology	0	1
400	11.06	RNA modification	0	1
401	11.06.01	rRNA modification	0	1
402	11.06.02	tRNA modification	0	1
403	11.06.03	mRNA modification	0	1
404	11.06.03.01	mRNA editing	0	1
405	12	PROTEIN SYNTHESIS	0	1
406	12.01	ribosome biogenesis	0	1
407	12.01.01	ribosomal proteins	0	1
408	12.04	translation	0	1
409	12.04.01	translation initiation	0	1
410	12.04.02	translation elongation	0	1
411	12.04.03	translation termination	0	1
412	12.07	translational control	0	1
413	12.1	aminoacyl-tRNA-synthetases	0	1
414	12.11	selenocystein biosynthesis and incorporation	0	1
415	14	PROTEIN FATE (folding, modification, destination)	7	0.999649	NCU01059 NCU01589 NCU01907 NCU02059 NCU02915 NCU05980 NCU07063
416	14.01	protein folding and stabilization	1	0.831833	NCU01589
417	14.04	protein targeting, sorting and translocation	2	0.940012	NCU01589 NCU01907
418	14.07	protein modification	3	0.998693	NCU01059 NCU01589 NCU07063
419	14.07.01	modification with fatty acids (egmyristylation, palmitylation, farnesylation)	0	1
420	14.07.02	modification with sugar residues (egglycosylation, deglycosylation)	1	0.725559	NCU01059
421	14.07.02.01	O-directed glycosylation, deglycosylation	0	1
422	14.07.02.02	N-directed glycosylation, deglycosylation	0	1
423	14.07.03	modification by phosphorylation, dephosphorylation, autophosphorylation	0	1
424	14.07.04	modification by acetylation, deacetylation	0	1
425	14.07.05	modification by ubiquitination, deubiquitination	0	1
426	14.07.07	modification by ubiquitin-related proteins	0	1
427	14.07.09	posttranslational modification of amino acids (eghydroxylation, methylation)	0	1
428	14.07.11	protein processing (proteolytic)	1	0.805195	NCU07063
429	14.07.11.01	autoproteolytic processing	0	1
430	14.07.12	protein processing (non-proteolytic, egiron-incorporation)	0	1
431	14.1	assembly of protein complexes	0	1
432	14.13	protein/peptide degradation	2	0.956744	NCU02059 NCU05980
433	14.13.01	cytoplasmic and nuclear protein degradation	0	1
434	14.13.01.01	proteasomal degradation (ubiquitin/proteasomal pathway)	0	1
435	14.13.04	lysosomal and vacuolar protein degradation	0	1
436	14.13.04.01	lysosomal protein degradation	0	1
437	14.13.04.02	vacuolar protein degradation	0	1
438	16	PROTEIN WITH BINDING FUNCTION OR COFACTOR REQUIREMENT (structural or catalytic)	27	0.744186	NCU00891 NCU01195 NCU01589 NCU01906 NCU01907 NCU02009 NCU03607 NCU04168 NCU04292 NCU04400 NCU04791 NCU05159 NCU05591 NCU05924 NCU05955 NCU07546 NCU08044 NCU08115 NCU08189 NCU08384 NCU08411 NCU08687 NCU09264 NCU09664 NCU09705 NCU10009 NCU11353
439	16.01	protein binding	5	0.999369	NCU01589 NCU01907 NCU08115 NCU08687 NCU09705
440	16.01.01	receptor binding	0	1
441	16.02	peptide binding	0	1
442	16.03	nucleic acid binding	2	0.996187	NCU01589 NCU08115
443	16.03.01	DNA binding	2	0.875144	NCU01589 NCU08115
444	16.03.03	RNA binding	0	1
445	16.05	polysaccharide binding	6	7.55716e-07	NCU04168 NCU05159 NCU05924 NCU05955 NCU08189 NCU09664
446	16.06	motor protein binding	0	1
447	16.07	structural protein binding	0	1
448	16.09	lipid binding	0	1
449	16.1	amine binding	0	1
450	16.11	amino acid/amino acid derivatives binding	0	1
451	16.12	sulfate binding	0	1
452	16.13	C-compound binding	0	1
453	16.13.01	sugar binding	0	1
454	16.13.03	fatty acid binding (egacyl-carrier protein)	0	1
455	16.14	selen binding	0	1
456	16.15	drug/toxin binding	0	1
457	16.16	antigen binding	0	1
458	16.17	metal binding	3	0.912551	NCU00891 NCU02009 NCU09264
459	16.17.01	calcium binding	0	1
460	16.17.03	potassium binding	0	1
461	16.17.05	sodium binding	0	1
462	16.17.07	magnesium binding	0	1
463	16.17.09	heavy metal binding (Cu, Fe, Zn)	3	0.644177	NCU00891 NCU02009 NCU09264
464	16.18	virus particle binding	0	1
465	16.19	nucleotide/nucleoside/nucleobase binding	7	0.784971	NCU04400 NCU05591 NCU07546 NCU08115 NCU08687 NCU10009 NCU11353
466	16.19.01	cyclic nucleotide binding (cAMP, cGMP, etc)	0	1
467	16.19.03	ATP binding	7	0.493243	NCU04400 NCU05591 NCU07546 NCU08115 NCU08687 NCU10009 NCU11353
468	16.19.05	GTP binding	0	1
469	16.21	complex cofactor/cosubstrate/vitamine binding	9	0.0344906	NCU00891 NCU01195 NCU01906 NCU03607 NCU04292 NCU04791 NCU08044 NCU08384 NCU08411
470	16.21.01	heme binding	0	1
471	16.21.03	molybdopterin binding	0	1
472	16.21.05	FAD/FMN binding	0	1
473	16.21.07	NAD/NADP binding	6	0.0243507	NCU00891 NCU01195 NCU01906 NCU04791 NCU08044 NCU08384
474	16.21.08	Fe/S binding	0	1
475	16.21.09	cobalamine binding	0	1
476	16.21.11	thiamine pyrophosphate binding	0	1
477	16.21.13	lipoamide binding	0	1
478	16.21.15	biotin binding	0	1
479	16.21.17	pyridoxal phosphate binding	3	0.0262223	NCU03607 NCU04292 NCU08411
480	16.22	hormone binding	0	1
481	16.23	neurotransmitter binding	0	1
482	16.25	oxygen binding	0	1
483	18	REGULATION OF METABOLISM AND PROTEIN FUNCTION	0	1
484	18.01	regulation by	0	1
485	18.01.01	regulation by modification	0	1
486	18.01.03	regulation by localization	0	1
487	18.01.05	regulation by processing	0	1
488	18.01.07	regulation by binding / dissociation	0	1
489	18.02	regulation of protein activity	0	1
490	18.02.01	enzymatic activity regulation / enzyme regulator	0	1
491	18.02.01.01	enzyme activator	0	1
492	18.02.01.01.01	GTPase activator (GAP)	0	1
493	18.02.01.01.03	protease activator	0	1
494	18.02.01.01.05	kinase activator	0	1
495	18.02.01.02	enzyme inhibitor	0	1
496	18.02.01.02.01	GTPase inhibitor (GIP)	0	1
497	18.02.01.02.03	protease inhibitor	0	1
498	18.02.01.02.05	kinase inhibitior	0	1
499	18.02.03	guanyl-nucleotide exchange factor (GEF)	0	1
500	18.02.05	regulator of G-protein signalling	0	1
501	18.02.07	regulator of receptor activity	0	1
502	18.02.09	regulator of transcription factor	0	1
503	18.02.10	regulation of channel activity	0	1
504	20	CELLULAR TRANSPORT, TRANSPORT FACILITATION AND TRANSPORT ROUTES	21	0.539321	NCU00801 NCU01589 NCU01633 NCU01907 NCU02009 NCU04537 NCU05068 NCU05350 NCU05580 NCU05591 NCU05853 NCU05863 NCU06137 NCU06138 NCU06384 NCU07546 NCU07736 NCU08114 NCU09098 NCU10009 NCU10021
505	20.01	transported compounds (substrates)	20	0.0814155	NCU00801 NCU01589 NCU01633 NCU01907 NCU02009 NCU04537 NCU05068 NCU05350 NCU05580 NCU05591 NCU05853 NCU06137 NCU06138 NCU06384 NCU07546 NCU07736 NCU08114 NCU09098 NCU10009 NCU10021
506	20.01.01	ion transport	4	0.386674	NCU02009 NCU05591 NCU07546 NCU10009
507	20.01.01.01	cation transport (H+, Na+, K+, Ca+ , NH+, etc)	4	0.25623	NCU02009 NCU05591 NCU07546 NCU10009
508	20.01.01.01.01	heavy metal ion transport (Cu+, Fe+, etc)	1	0.631987	NCU02009
509	20.01.01.01.01.01	siderophore-iron transport	0	1
510	20.01.01.01.01.02	citrate-iron transport	0	1
511	20.01.01.01.02	organic cation transport	0	1
512	20.01.01.07	anion transport	0	1
513	20.01.01.07.01	nitrate transport	0	1
514	20.01.01.07.03	nitrite transport	0	1
515	20.01.01.07.05	sulfate/sulfite transport	0	1
516	20.01.01.07.07	phosphate transport	0	1
517	20.01.01.07.08	organic anion transport	0	1
518	20.01.01.07.09	chloride transport	0	1
519	20.01.03	C-compound and carbohydrate transport	12	2.63632e-06	NCU00801 NCU01633 NCU04537 NCU05350 NCU05591 NCU05853 NCU06138 NCU06384 NCU07546 NCU08114 NCU10009 NCU10021
520	20.01.03.01	sugar transport	3	0.00503781	NCU01633 NCU04537 NCU10021
521	20.01.03.03	C-dicarboxylate transport (egmalate, succinate, fumarate)	0	1
522	20.01.07	amino acid/amino acid derivatives transport	0	1
523	20.01.09	peptide transport	0	1
524	20.01.10	protein transport	2	0.750992	NCU01589 NCU01907
525	20.01.11	amine / polyamine transport	0	1
526	20.01.13	lipid/fatty acid transport	3	0.0932562	NCU05068 NCU05591 NCU10009
527	20.01.15	electron transport	1	0.975945	NCU06137
528	20.01.17	nucleotide/nucleoside/nucleobase transport	0	1
529	20.01.21	RNA transport	0	1
530	20.01.23	allantoin and allantoate transport	0	1
531	20.01.25	vitamine/cofactor transport	0	1
532	20.01.26	neurotransmitter transport	0	1
533	20.01.27	drug/toxin transport	6	0.00306505	NCU05580 NCU05591 NCU07546 NCU07736 NCU09098 NCU10009
534	20.01.28	hormone transport	0	1
535	20.03	transport facilities	11	0.0625511	NCU01633 NCU04537 NCU05068 NCU05350 NCU05591 NCU05853 NCU05863 NCU07546 NCU08114 NCU10009 NCU10021
536	20.03.01	channel / pore class transport	0	1
537	20.03.01.01	ion channels	0	1
538	20.03.01.03	gap-junction forming protein family (egconnexin, innexin)	0	1
539	20.03.01.05	nuclear pore forming protein	0	1
540	20.03.01.06	porins of mitochondria or plastids	0	1
541	20.03.01.07	general bacterial porin family (egompf, sugar porin, omf)	0	1
542	20.03.01.09	pore-forming toxins (egdiphteria toxin, hemolysin)	0	1
543	20.03.02	carrier (electrochemical potential-driven transport)	1	0.428934	NCU10021
544	20.03.02.01	uniporter	0	1
545	20.03.02.02	symporter	1	0.216061	NCU10021
546	20.03.02.02.01	proton driven symporter	1	0.135863	NCU10021
547	20.03.02.02.02	sodium driven symporter	0	1
548	20.03.02.03	antiporter	0	1
549	20.03.02.03.01	proton driven antiporter	0	1
550	20.03.02.03.02	sodium driven antiporter	0	1
551	20.03.09	phosphotransferase system	0	1
552	20.03.22	transport ATPases	5	0.0100737	NCU05068 NCU05591 NCU05863 NCU07546 NCU10009
553	20.03.25	ABC transporters	3	0.0510639	NCU05591 NCU07546 NCU10009
554	20.09	transport routes	16	0.317798	NCU00801 NCU01589 NCU01633 NCU01907 NCU02009 NCU04537 NCU05591 NCU05853 NCU05863 NCU06138 NCU06384 NCU07546 NCU07736 NCU08114 NCU10009 NCU10021
555	20.09.01	nuclear transport	0	1
556	20.09.02	chloroplast transport	0	1
557	20.09.03	peroxisomal transport	0	1
558	20.09.04	mitochondrial transport	1	0.865141	NCU01589
559	20.09.05	non-vesicular ER transport	0	1
560	20.09.07	vesicular transport (Golgi network, etc)	1	0.980745	NCU01907
561	20.09.07.03	ER to Golgi transport	1	0.711799	NCU01907
562	20.09.07.05	intra Golgi transport	0	1
563	20.09.07.06	post Golgi transport	0	1
564	20.09.07.07	retrograde transport	0	1
565	20.09.07.25	vesicle formation	0	1
566	20.09.07.26	vesicle docking	0	1
567	20.09.07.27	vesicle fusion	1	0.288844	NCU01907
568	20.09.07.29	vesicle recycling	0	1
569	20.09.13	vacuolar/lysosomal transport	0	1
570	20.09.14	cytoskeleton-dependent transport	0	1
571	20.09.14.01	tubulin dependent transport	0	1
572	20.09.14.02	actin dependent transport	0	1
573	20.09.16	cellular export and secretion	6	0.0648037	NCU01633 NCU05591 NCU05863 NCU07546 NCU07736 NCU10009
574	20.09.16.01	Type I protein secretion system (ABC-type transport systems)	3	0.00503781	NCU05591 NCU07546 NCU10009
575	20.09.16.02	Type II protein secretion system (general secretory pathway, exocytosis)	0	1
576	20.09.16.03	Type III protein secretion system (virulence related secretory pathway, Gram- bacteria specific)	0	1
577	20.09.16.04	Type IV protein secretion system (conjugal DNA-protein transfer)	0	1
578	20.09.16.05	Type V protein secretion system (MttABC or TatABCDE-system)	0	1
579	20.09.16.07	non-vesicular cellular export	0	1
580	20.09.16.09	vesicular cellular export	0	1
581	20.09.16.09.03	exocytosis	0	1
582	20.09.16.09.05	synaptic vesicle exocytosis	0	1
583	20.09.18	cellular import	10	0.0138148	NCU00801 NCU01633 NCU01907 NCU02009 NCU04537 NCU05853 NCU06138 NCU06384 NCU08114 NCU10021
584	20.09.18.07	non-vesicular cellular import	8	0.000968013	NCU00801 NCU01633 NCU04537 NCU05853 NCU06138 NCU06384 NCU08114 NCU10021
585	20.09.18.09	vesicular cellular import	1	0.819001	NCU01907
586	20.09.18.09.01	endocytosis	1	0.819001	NCU01907
587	20.09.18.09.01.01	receptor-mediated endocytosis	0	1
588	20.09.18.09.01.03	constitutive endocytosis	0	1
589	20.09.18.09.01.05	synaptic vesicle endocytosis	0	1
590	30	CELLULAR COMMUNICATION/SIGNAL TRANSDUCTION MECHANISM	1	0.99814	NCU01704
591	30.01	cellular signalling	0	1
592	30.01.05	enzyme mediated signal transduction	0	1
593	30.01.05.01	protein kinase	0	1
594	30.01.05.01.01	JAK-STAT cascade	0	1
595	30.01.05.01.02	JNK cascade	0	1
596	30.01.05.01.03	MAPKKK cascade	0	1
597	30.01.05.01.04	NIK-I-kappaB/NF-kappaB cascade	0	1
598	30.01.05.01.05	tyrosine kinase	0	1
599	30.01.05.01.06	serine/threonine kinase	0	1
600	30.01.05.03	protease mediated signal transduction	0	1
601	30.01.05.05	G-protein mediated signal transduction	0	1
602	30.01.05.05.01	small GTPase mediated signal transduction	0	1
603	30.01.05.05.03	trimeric G-protein mediated signal transduction	0	1
604	30.01.05.07	two-component signal transduction system (egphosphorelay)	0	1
605	30.01.09	second messenger mediated signal transduction	0	1
606	30.01.09.01	NO mediated signal transduction	0	1
607	30.01.09.03	Ca+ mediated signal transduction	0	1
608	30.01.09.07	cAMP/cGMP mediated signal transduction	0	1
609	30.01.09.08	hormone mediated signal transduction	0	1
610	30.01.09.09	fatty acid derivatives mediated signal transduction	0	1
611	30.01.09.11	polyphosphoinositol mediated signal transduction	0	1
612	30.01.11	ligand-dependent nuclear receptors	0	1
613	30.05	transmembrane signal transduction	1	0.738664	NCU01704
614	30.05.01	receptor enzyme mediated signalling	0	1
615	30.05.01.05	interleukine receptor signalling pathway	0	1
616	30.05.01.10	two-component signal transduction system (sensor kinase component)	0	1
617	30.05.01.12	transmembrane receptor protein tyrosine kinase signalling pathways	0	1
618	30.05.01.12.01	EGF-receptor signalling pathway	0	1
619	30.05.01.12.03	FGF-receptor signalling pathway	0	1
620	30.05.01.12.04	IGF-receptor signalling pathway	0	1
621	30.05.01.12.05	insulin receptor signalling pathway	0	1
622	30.05.01.18	transmembrane receptor protein serine/threonine kinase signalling pathways	0	1
623	30.05.01.18.01	TGF-beta-receptor signalling pathway	0	1
624	30.05.02	non-enzymatic receptor mediated signalling	0	1
625	30.05.02.14	Notch-receptor signalling pathway	0	1
626	30.05.02.16	hedgehog-dependent signalling pathway	0	1
627	30.05.02.20	Wnt signalling pathway	0	1
628	30.05.02.22	Tl-receptor (LRR proteins) signalling pathway	0	1
629	30.05.02.24	G-protein coupled receptor signalling pathway	0	1
630	30.05.02.24.01	serotonin receptor signalling pathway	0	1
631	30.05.02.24.02	acetyl choline receptor signalling pathway	0	1
632	30.05.02.24.03	dopamine receptor signalling pathway	0	1
633	30.05.02.24.04	gamma-aminobutyric acid signalling pathway	0	1
634	30.05.02.24.05	glutamate signalling pathway	0	1
635	30.05.02.24.06	neuropeptide signalling pathway	0	1
636	30.05.02.26	integrin receptor signalling pathway	0	1
637	30.05.02.28	cadherin mediated signalling pathway	0	1
638	30.05.02.30	ion channel mediated signalling pathway	0	1
639	30.07	regulation of signal transduction	0	1
640	32	CELL RESCUE, DEFENSE AND VIRULENCE	25	0.00129087	NCU00130 NCU00710 NCU00762 NCU01196 NCU01320 NCU01589 NCU01906 NCU02627 NCU02855 NCU02918 NCU03013 NCU04400 NCU04870 NCU05580 NCU05591 NCU05848 NCU05955 NCU07055 NCU07224 NCU07546 NCU07736 NCU08115 NCU08384 NCU09098 NCU10009
641	32.01	stress response	10	0.247236	NCU01196 NCU01320 NCU01589 NCU01906 NCU03013 NCU04400 NCU05591 NCU08115 NCU08384 NCU10009
642	32.01.01	oxidative stress response	2	0.339093	NCU05591 NCU10009
643	32.01.03	osmotic and salt stress response	2	0.3214	NCU01906 NCU08384
644	32.01.04	pH stress response	0	1
645	32.01.05	heat shock response	3	0.0624999	NCU01589 NCU01906 NCU08384
646	32.01.06	cold shock response	0	1
647	32.01.07	unfolded protein response (egER quality control)	0	1
648	32.01.09	DNA damage response	1	0.697352	NCU08115
649	32.01.11	nutrient starvation response	0	1
650	32.01.13	electromagnetic waves stress response (egUV, X-ray)	0	1
651	32.05	disease, virulence and defense	12	0.000766042	NCU00130 NCU00710 NCU02627 NCU02918 NCU04870 NCU05580 NCU05591 NCU05848 NCU07546 NCU07736 NCU09098 NCU10009
652	32.05.01	resistance proteins	4	0.0772387	NCU05591 NCU07546 NCU09098 NCU10009
653	32.05.01.01	antibiotic resistance	1	0.114569	NCU09098
654	32.05.01.03	chemical agent resistance	2	0.104693	NCU05591 NCU10009
655	32.05.01.03.01	organic chemical agent resistance	0	1
656	32.05.01.03.03	inorganic chemical agent resistance (egheavy metals)	0	1
657	32.05.01.05	bacteriocine resistance	0	1
658	32.05.01.07	electromagnetic waves resistance (egUV)	0	1
659	32.05.03	defense related proteins	2	0.13663	NCU00130 NCU05848
660	32.05.05	virulence, disease factors	6	0.00235822	NCU00710 NCU02627 NCU02918 NCU04870 NCU05580 NCU07736
661	32.05.05.01	toxins	1	0.271305	NCU05580
662	32.05.05.02	antibiotics	0	1
663	32.05.05.03	bacteriocins	0	1
664	32.05.05.05	invasins	0	1
665	32.05.05.06	internalins	0	1
666	32.05.05.07	adhaesins	0	1
667	32.05.05.08	cytolysins	0	1
668	32.05.05.09	evasion of host immune system	0	1
669	32.05.05.13	antigenic determinants	0	1
670	32.07	detoxification	9	0.00721606	NCU01320 NCU03013 NCU05580 NCU05591 NCU05848 NCU07055 NCU07224 NCU07546 NCU10009
671	32.07.01	detoxification involving cytochrome P	1	0.305963	NCU05848
672	32.07.03	detoxification by modification	3	0.0150695	NCU03013 NCU07055 NCU07224
673	32.07.05	detoxification by export	4	0.0104875	NCU05580 NCU05591 NCU07546 NCU10009
674	32.07.07	oxygen and radical detoxification	1	0.482022	NCU01320
675	32.07.07.01	catalase reaction	0	1
676	32.07.07.03	glutathione conjugation reaction	1	0.196735	NCU01320
677	32.07.07.05	peroxidase reaction	0	1
678	32.07.07.07	superoxide metabolism	0	1
679	32.07.09	detoxification by degradation	0	1
680	32.07.11	detoxification by impermeability	0	1
681	32.1	degradation / modification of foreign (exogenous) compounds	3	0.00256914	NCU00762 NCU02855 NCU05955
682	32.10.03	degradation / modification of foreign (exogenous) polynucleotides	0	1
683	32.10.05	degradation / modification of foreign (exogenous) proteins	0	1
684	32.10.07	degradation / modification of foreign (exogenous) polysaccharides	3	0.00256914	NCU00762 NCU02855 NCU05955
685	32.10.09	degradation / modification of foreign (exogenous) ester compounds	0	1
686	34	INTERACTION WITH THE ENVIRONMENT	13	0.192713	NCU01633 NCU01906 NCU02009 NCU02500 NCU04537 NCU05580 NCU05591 NCU07546 NCU08164 NCU08384 NCU09291 NCU10009 NCU10021
687	34.01	homeostasis	4	0.563807	NCU02009 NCU05591 NCU09291 NCU10009
688	34.01.01	homeostasis of cations	4	0.47806	NCU02009 NCU05591 NCU09291 NCU10009
689	34.01.01.01	homeostasis of metal ions (Na, K, Ca etc)	4	0.250954	NCU02009 NCU05591 NCU09291 NCU10009
690	34.01.01.03	homeostasis of protons	0	1
691	34.01.03	homeostasis of anions	0	1
692	34.01.03.01	homeostasis of sulfate	0	1
693	34.01.03.03	homeostasis of phosphate	0	1
694	34.01.03.05	homeostasis of chloride	0	1
695	34.01.04	glucose homeostasis	0	1
696	34.01.05	water homeostasis	0	1
697	34.01.06	immune cell homeostasis	0	1
698	34.01.07	cholesterol homeostasis	0	1
699	34.03	membrane excitability	0	1
700	34.03.01	synaptic transmission	0	1
701	34.03.03	regulation, generation and propagation of action potential	0	1
702	34.05	cell motility	0	1
703	34.05.01	cell migration	0	1
704	34.05.02	motor activity	0	1
705	34.05.07	ciliary/flagellar motility	0	1
706	34.05.09	polymerization based motility	0	1
707	34.07	cell adhesion	0	1
708	34.07.01	cell-cell adhesion	0	1
709	34.07.02	cell-matrix adhesion	0	1
710	34.11	cellular sensing and response to external stimulus	9	0.113499	NCU01633 NCU01906 NCU02500 NCU04537 NCU05580 NCU07546 NCU08164 NCU08384 NCU10021
711	34.11.01	photoperception and response	1	0.234924	NCU08164
712	34.11.01.02	phototropism	0	1
713	34.11.01.03	visual transduction	0	1
714	34.11.01.05	phototaxis	0	1
715	34.11.03	chemoperception and response	5	0.402694	NCU01906 NCU02500 NCU05580 NCU07546 NCU08384
716	34.11.03.03	chemotaxis	0	1
717	34.11.03.04	chemotropism	0	1
718	34.11.03.07	pheromone response, mating-type determination, sex-specific proteins	1	0.95199	NCU02500
719	34.11.03.07.01	sexual incompatibility	0	1
720	34.11.03.11	pH response	0	1
721	34.11.03.12	water response	0	1
722	34.11.03.13	osmosensing and response	2	0.187707	NCU01906 NCU08384
723	34.11.03.15	quorum sensing system	0	1
724	34.11.05	mechanical stimulus perception and response	0	1
725	34.11.07	gravity perception and response	0	1
726	34.11.07.01	gravitropism	0	1
727	34.11.08	electromagnetic field perception and response	0	1
728	34.11.09	temperature perception and response	0	1
729	34.11.10	response to biotic stimulus	0	1
730	34.11.11	rhythm (egcircadian, ultradian)	1	0.216061	NCU02500
731	34.11.12	perception of nutrients and nutritional adaptation	3	0.0191226	NCU01633 NCU04537 NCU10021
732	34.11.13	gas and metabolite distribution	0	1
733	34.11.13.01	gas exchange and distribution	0	1
734	34.11.13.03	control of respiratory activity	0	1
735	34.11.13.05	metabolite distribution	0	1
736	34.11.13.07	circulation (egblood pressure)	0	1
737	36	SYSTEMIC INTERACTION WITH THE ENVIRONMENT	0	1
738	36.2	plant / fungal specific systemic sensing and response	0	1
739	36.20.16	plant defense response	0	1
740	36.20.16.01	disease resistance (R-gene) specific	0	1
741	36.20.16.03	jasmonic acid/ethylene dependent systemic resistance	0	1
742	36.20.16.05	systemic acquired resistance	0	1
743	36.20.16.07	hypersensitive response	0	1
744	36.20.18	plant hormonal regulation	0	1
745	36.20.18.01	auxin response	0	1
746	36.20.18.02	ethylen response	0	1
747	36.20.18.03	gibberellic acid response	0	1
748	36.20.18.04	cytokinin response	0	1
749	36.20.18.05	abscisic acid response	0	1
750	36.20.18.06	brassinosteroid response	0	1
751	36.20.18.99	other plant signalling molecules response (jasmonic acid, salicylic acid etc)	0	1
752	36.25	animal specific systemic sensing and response	0	1
753	36.25.01	animal sensory mechanisms	0	1
754	36.25.01.01	vision	0	1
755	36.25.01.03	hearing	0	1
756	36.25.01.05	tactile sense (peripheral physical and mechanical stimuli perception)	0	1
757	36.25.01.07	sense of balance and equilibrium (vestibular pathways and mechanisms)	0	1
758	36.25.01.09	proprioceptive pathways and mechanisms	0	1
759	36.25.01.11	taste	0	1
760	36.25.01.13	olfaction	0	1
761	36.25.01.15	pain (nociceptive pathways)	0	1
762	36.25.03	nervous system physiology	0	1
763	36.25.03.01	nervous system mediated vegetative activities / neurosecretory activities	0	1
764	36.25.03.01.01	effect on glands / hormones	0	1
765	36.25.03.01.03	effect on smooth muscles	0	1
766	36.25.03.01.05	effect on heart muscle	0	1
767	36.25.03.03	nervous system mediated motor activity	0	1
768	36.25.03.03.01	neuromuscular junction-related activities	0	1
769	36.25.03.03.03	movement and posture coordination	0	1
770	36.25.03.04	neuronal integrative functions	0	1
771	36.25.03.04.01	learning and memory	0	1
772	36.25.07	animal hormonal regulation	0	1
773	36.25.07.01	effect on kinetics (muscle contraction, pigment, gland secretion)	0	1
774	36.25.07.03	effect on homeostasis (egmetabolism or electrolyte homeostasis)	0	1
775	36.25.07.05	effect on morphogenesis	0	1
776	36.25.07.07	effect on behaviour	0	1
777	36.25.09	muscle contraction	0	1
778	36.25.09.01	smooth muscle contraction	0	1
779	36.25.09.03	striated muscle contraction	0	1
780	36.25.09.04	heart muscle contraction	0	1
781	36.25.09.05	general muscle contraction regulation	0	1
782	36.25.16	immune response	0	1
783	36.25.16.01	innate immune response (invertebrates and vertebrates)	0	1
784	36.25.16.01.01	complement response	0	1
785	36.25.16.01.03	phagocyte response (egmacrophages, dendritic cells, granulocytes)	0	1
786	36.25.16.01.05	cytotoxic cell response (egNK)	0	1
787	36.25.16.01.07	acute phase response (C-reactive protein)	0	1
788	36.25.16.03	adaptive immune response (vertebrates)	0	1
789	36.25.16.03.01	humoral response (B-cells)	0	1
790	36.25.16.03.03	adaptive cell mediated response (T-cells)	0	1
791	36.25.16.03.05	antigen presentation / processing	0	1
792	36.25.16.03.07	immunological memory	0	1
793	36.25.16.07	inflammatory response	0	1
794	36.25.16.08	response to wounding	0	1
795	36.25.16.09	blood coagulation	0	1
796	38	TRANSPOSABLE ELEMENTS, VIRAL AND PLASMID PROTEINS	0	1
797	38.01	LTR retroelements (retroviral)	0	1
798	38.02	non-LTR retroelements	0	1
799	38.03	transposons	0	1
800	38.05	viral proteins	0	1
801	38.06	phage proteins	0	1
802	38.07	proteins necessary for transposon movement	0	1
803	40	CELL FATE	6	0.431324	NCU00326 NCU01589 NCU01704 NCU02668 NCU07253 NCU09264
804	40.01	cell growth / morphogenesis	1	0.983402	NCU07253
805	40.01.01	non-directional cell growth	0	1
806	40.01.03	directional cell growth (morphogenesis)	1	0.697352	NCU07253
807	40.01.03.01	regulation of directional cell growth	0	1
808	40.01.03.03	guidance of longitudinal cell extension (egpollen tube guidance, axonal pathfinding)	0	1
809	40.01.05	growth regulators / regulation of cell size	0	1
810	40.01.05.01	interpretation of external signals that control cell growth	0	1
811	40.01.05.02	interpretation of nuclear/cytoplasmic ratio to control cell growth	0	1
812	40.02.03	activity of intercellular mediators	1	0.114569	NCU01704
813	40.02.03.01	cytokines (interleukines, colony stimulating factors, etc)	0	1
814	40.02.03.03	chemokines	0	1
815	40.02.03.05	growth factors	0	1
816	40.02.03.07	trophic factors	0	1
817	40.05	dedifferentiation	0	1
818	40.1	cell death	1	0.68986	NCU09264
819	40.10.02	apoptosis (type I programmed cell death)	1	0.68986	NCU09264
820	40.10.02.01	anti-apoptosis	0	1
821	40.10.02.02	apoptotic program	0	1
822	40.10.02.02.01	apoptotic mitochondrial changes	0	1
823	40.10.02.02.02	caspase activation	0	1
824	40.10.02.02.03	disassembly of cell structures	0	1
825	40.10.02.02.04	induction of proapoptotic gene products	0	1
826	40.10.02.02.05	repression of survival gene products	0	1
827	40.10.02.03	induction of apoptosis	0	1
828	40.10.02.03.01	induction of apoptosis by extracellular signals	0	1
829	40.10.02.03.02	induction of apoptosis by intracellular signals	0	1
830	40.10.02.04	regulation of apoptosis	0	1
831	40.10.90	other programmed cell death	0	1
832	40.2	cell aging	0	1
833	41	DEVELOPMENT (Systemic)	0	1
834	41.01	fungal/microorganismic development	0	1
835	41.01.01	mating (fertilization)	0	1
836	41.01.03	tissue pattern formation	0	1
837	41.01.03.01	fruit body development (sexually or asexually derived spores)	0	1
838	41.01.03.03	mycelium development (hyphae, vegetative thallus)	0	1
839	41.03	plant development	0	1
840	41.03.01	gametophyte development	0	1
841	41.03.01.01	microspore development (male gametophyte)	0	1
842	41.03.01.02	macrospore development (female gametophyte)	0	1
843	41.03.02	fertilization (pollen hydration, pollen tube guidance, double fertilization of oocyte and endosperm)	0	1
844	41.03.03	embryonal development	0	1
845	41.03.03.01	zygote development	0	1
846	41.03.03.02	early embryo development (Dicotyledone pre-heart stages)	0	1
847	41.03.03.03	mid-stage embryo development (Dicotyledone heart to torpedo)	0	1
848	41.03.03.04	late-stage embryo development (Dicotyledone torpedo and later)	0	1
849	41.03.03.05	mature embryo development	0	1
850	41.03.04	endosperm development	0	1
851	41.03.05	germination	0	1
852	41.03.06	vegetative development	0	1
853	41.03.07	flower development	0	1
854	41.03.08	fruit development and ripening	0	1
855	41.03.10	senescence	0	1
856	41.05	animal development	0	1
857	41.05.01	fertilization	0	1
858	41.05.02	embryo implantation (mammalia)	0	1
859	41.05.04	embryogenesis	0	1
860	41.05.04.01	early embryogenesis	0	1
861	41.05.04.01.01	morula development	0	1
862	41.05.04.01.03	blastocyst development	0	1
863	41.05.04.01.03.01	trophectoderm	0	1
864	41.05.04.01.03.03	inner cell mass	0	1
865	41.05.04.01.05	blastocoel development	0	1
866	41.05.04.01.07	blastulation	0	1
867	41.05.04.02	gastrulation	0	1
868	41.05.04.03	late embryogenesis	0	1
869	41.05.11	extraembryonal tissue development	0	1
870	41.05.12	odontogenesis	0	1
871	41.05.13	neurogenesis	0	1
872	41.05.13.01	synaptogenesis	0	1
873	41.05.15	myogenesis	0	1
874	41.05.16	angiogenesis	0	1
875	41.05.17	osteogenesis	0	1
876	41.05.18	hemopoiesis	0	1
877	41.05.19	asymmetries and axis determination	0	1
878	41.05.19.01	vegetal pole determination	0	1
879	41.05.19.03	animal pole determination	0	1
880	41.05.19.05	anterior-posterior axis determination	0	1
881	41.05.19.07	dorso-ventral axis determination	0	1
882	41.05.19.08	proximal-distal axis determination	0	1
883	41.05.19.09	medio-lateral axis determination	0	1
884	41.05.19.11	segment specification	0	1
885	41.05.21	extremities and appendages development	0	1
886	41.05.23	sex differentiation	0	1
887	41.05.25	gametogenesis	0	1
888	42	BIOGENESIS OF CELLULAR COMPONENTS	8	0.89452	NCU01195 NCU01692 NCU02059 NCU04168 NCU05974 NCU07253 NCU07277 NCU09291
889	42.01	cell wall	4	0.462247	NCU01195 NCU04168 NCU05974 NCU07253
890	42.02	eukaryotic plasma membrane	0	1
891	42.02.01	eukaryotic intracellular plasma membrane	0	1
892	42.03	cytoplasm	0	1
893	42.04	cytoskeleton/structural proteins	0	1
894	42.04.03	actin cytoskeleton	0	1
895	42.04.05	microtubule cytoskeleton	0	1
896	42.04.07	intermediate filaments	0	1
897	42.05	centrosome	0	1
898	42.06	cell junction	0	1
899	42.06.03	cell-substrate adherens junction	0	1
900	42.06.04	intercellular junction (gap junction/adherens junction)	0	1
901	42.07	endoplasmic reticulum	0	1
902	42.08	Golgi	0	1
903	42.09	intracellular transport vesicles	0	1
904	42.1	nucleus	0	1
905	42.10.03	organization of chromosome structure	0	1
906	42.10.04	centromere / kinetochore	0	1
907	42.10.05	nuclear membrane	0	1
908	42.10.06	nuclear matrix	0	1
909	42.10.07	nucleolus	0	1
910	42.10.09	nuclear speckles	0	1
911	42.16	mitochondrion	2	0.541801	NCU01692 NCU09291
912	42.16.01	mitochondrion inheritance	0	1
913	42.19	peroxisome	0	1
914	42.22	endosome	0	1
915	42.25	vacuole or lysosome	0	1
916	42.26	plastid	0	1
917	42.26.03	chloroplast	0	1
918	42.26.05	amyloplast	0	1
919	42.26.07	chromoplast	0	1
920	42.26.09	elaioplast	0	1
921	42.26.11	etioplast	0	1
922	42.26.13	leucoplast	0	1
923	42.27	extracellular / secretion proteins	2	0.0324016	NCU02059 NCU07277
924	42.27.01	extracellular matrix	0	1
925	42.27.03	cell membrane or cell wall attached	0	1
926	42.28	periplasmatic space	0	1
927	42.29	bud / growth tip	0	1
928	42.3	prokaryotic cytoplasmic membrane	0	1
929	42.32	flagellum	0	1
930	42.33	pilus/fimbria	0	1
931	42.34	prokaryotic cell envelope structures	0	1
932	42.34.01	bacterial outer membrane (only in Gram- bacteria)	0	1
933	42.34.03	capsule and slime layer	0	1
934	42.34.05	S-Layer	0	1
935	42.34.07	peptidoglycan layer or other prokaryotic cell wall	0	1
936	42.34.09	spore or cyst coat	0	1
937	42.35	prokaryotic intracytoplasmic membrane	0	1
938	42.35.03	prokaryotic vesicular intracytoplasmic membrane	0	1
939	42.35.05	prokaryotic tubular intracytoplasmic membrane	0	1
940	42.35.07	prokaryotic thylakoid-like and thylakoid membrane	0	1
941	42.36	prokaryotic cell inclusions	0	1
942	42.37	prokaryotic nucleoid	0	1
943	43	CELL TYPE DIFFERENTIATION	0	1
944	43.01	fungal/microorganismic cell type differentiation	0	1
945	43.01.02	prokaryotic cell type differentiation	0	1
946	43.01.02.01	development free living cell or mycelium	0	1
947	43.01.02.02	development of sporangia and cystophore	0	1
948	43.01.02.03	development of heterocyste	0	1
949	43.01.02.05	sporulation and other development of resting stage	0	1
950	43.01.02.05.01	development of endospore	0	1
951	43.01.02.05.03	development of exospore, cyst, akinete or other resting cell	0	1
952	43.01.02.07	germination from resting stage	0	1
953	43.01.02.09	development of stalked or other sessile cell	0	1
954	43.01.02.11	development of swarmer or other mobile cell	0	1
955	43.01.03	fungal and other eukaryotic cell type differentiation	0	1
956	43.01.03.01	development of free swimming or amoeboid cell	0	1
957	43.01.03.02	development of mycelial or yeast-like cell	0	1
958	43.01.03.03	development of thallic, plasmodial or sporangiophore cell	0	1
959	43.01.03.05	budding, cell polarity and filament formation	0	1
960	43.01.03.06	hyphae formation	0	1
961	43.01.03.07	development of conidia	0	1
962	43.01.03.09	development of asco- basidio- or zygospore	0	1
963	43.01.06	protist cell differentiation	0	1
964	43.01.07	biofilm formation	0	1
965	43.02	plant cell type differentiation	0	1
966	43.02.01	stem cell/meristematic cell	0	1
967	43.02.05	epidermal cell	0	1
968	43.02.05.01	stomata/guard cell	0	1
969	43.02.05.02	plant hair cell (trichome egcotton)	0	1
970	43.02.05.03	root hair	0	1
971	43.02.07	storage cell	0	1
972	43.02.09	vascular cell	0	1
973	43.02.09.01	sieve cell (phloem)	0	1
974	43.02.09.02	companion cell (phloem)	0	1
975	43.02.09.03	vessel element (xylem)	0	1
976	43.02.11	mesenchymal / parenchymal cell	0	1
977	43.02.13	strengthening cell	0	1
978	43.02.13.01	sclerenchyma cell(dead)	0	1
979	43.02.13.02	collenchyma cell (living)	0	1
980	43.02.17	gametophytic cell	0	1
981	43.02.17.01	male gametophyte	0	1
982	43.02.17.01.01	generative pollen cell	0	1
983	43.02.17.02	female gametophyte	0	1
984	43.02.17.02.01	oocyte	0	1
985	43.02.17.02.03	central cell (n)	0	1
986	43.02.19	secretory cell	0	1
987	43.03	animal cell type differentiation	0	1
988	43.03.01	stem cell (toti- or pluripotent)	0	1
989	43.03.02	germ cell	0	1
990	43.03.03	pigment cell	0	1
991	43.03.04	epidermal cell (egkeratinocytes)	0	1
992	43.03.05	myoblast	0	1
993	43.03.07	blood cell	0	1
994	43.03.07.01	erythrocyte	0	1
995	43.03.07.02	leucocyte	0	1
996	43.03.07.02.01	lymphocyte	0	1
997	43.03.07.02.01.01	B-cell	0	1
998	43.03.07.02.01.02	T-cell	0	1
999	43.03.07.02.01.03	NK cell	0	1
1000	43.03.07.02.02	granulocyte	0	1
1001	43.03.07.02.03	monocyte (macrophage, dendritic cell)	0	1
1002	43.03.07.03	platelet	0	1
1003	43.03.11	glia cell	0	1
1004	43.03.13	neuron	0	1
1005	43.03.15	secretory cell (mastcell, endocrine cell, etc)	0	1
1006	43.03.17	structural cell of tissue (fibroblast, osteoblast, etc)	0	1
1007	43.03.18	storage cell (lipocyte, etc)	0	1
1008	43.03.19	extracellular matrix forming cell (fibrocyte, chondrocyte, osteocyte)	0	1
1009	43.03.21	extracellular matrix degrading cell (chondroclast, osteoclast)	0	1
1010	43.03.23	sensory cell	0	1
1011	45	TISSUE DIFFERENTIATION	0	1
1012	45.01	fungal/microorganismic tissue	0	1
1013	45.01.01	reproductive tissue	0	1
1014	45.01.10	thallic tissue	0	1
1015	45.01.11	plectenchymatic tissue and tissue of primitive thalli (eghigher fungi)	0	1
1016	45.02	plant tissue	0	1
1017	45.02.01	meristematic tissue	0	1
1018	45.02.01.01	shoot apical meristem	0	1
1019	45.02.01.02	root meristem	0	1
1020	45.02.05	parenchyma	0	1
1021	45.02.09	dermal tissue	0	1
1022	45.02.09.01	epidermis	0	1
1023	45.02.09.03	rhizodermis	0	1
1024	45.02.09.05	secondary dermal tissue (cork, phellem)	0	1
1025	45.02.09.07	endodermis (with casparian band)	0	1
1026	45.02.13	vascular tissue	0	1
1027	45.02.15	thallus	0	1
1028	45.03	animal tissue	0	1
1029	45.03.03	proliferative tissue (bone marrow, epidermis, etc)	0	1
1030	45.03.05	connective tissue	0	1
1031	45.03.05.01	loose connective tissue / soft tissue	0	1
1032	45.03.05.03	fibrous connective tissue (tendons, ligaments)	0	1
1033	45.03.05.05	cartilage	0	1
1034	45.03.05.07	bone	0	1
1035	45.03.05.09	whole blood and lymph	0	1
1036	45.03.05.11	adipose tissue	0	1
1037	45.03.09	epithelium	0	1
1038	45.03.10	chorion	0	1
1039	45.03.11	endothelium	0	1
1040	45.03.12	muscle	0	1
1041	45.03.12.01	striated muscle	0	1
1042	45.03.12.02	smooth muscle	0	1
1043	45.03.12.03	heart muscle	0	1
1044	45.03.15	reproductive tissue	0	1
1045	45.03.17	nervous tissue	0	1
1046	45.03.19	glandular tissue	0	1
1047	47	ORGAN DIFFERENTIATION	0	1
1048	47.01	fungal organ	0	1
1049	47.01.01	hyphe	0	1
1050	47.01.03	reproductive organ	0	1
1051	47.01.03.01	fruit body	0	1
1052	47.02	plant organ	0	1
1053	47.02.01	shoot	0	1
1054	47.02.01.01	stem	0	1
1055	47.02.01.02	leaf	0	1
1056	47.02.01.03	flower	0	1
1057	47.02.01.03.01	sepal	0	1
1058	47.02.01.03.02	petal	0	1
1059	47.02.01.03.03	anther	0	1
1060	47.02.01.03.04	carpel	0	1
1061	47.02.01.04	fruit	0	1
1062	47.02.01.05	seed	0	1
1063	47.02.01.05.01	embryo	0	1
1064	47.02.01.05.02	endosperm	0	1
1065	47.02.01.06	rhizome (potato tuber/onion)	0	1
1066	47.02.02	root	0	1
1067	47.03	animal organ	0	1
1068	47.03.01	nervous system	0	1
1069	47.03.01.01	central nervous system	0	1
1070	47.03.01.01.01	brain	0	1
1071	47.03.01.01.01.01	cerebrum	0	1
1072	47.03.01.01.01.02	cerebellum	0	1
1073	47.03.01.02	peripheral nervous system	0	1
1074	47.03.02	sensory organs	0	1
1075	47.03.02.01	ear	0	1
1076	47.03.02.02	eye	0	1
1077	47.03.02.03	nose	0	1
1078	47.03.02.04	tongue	0	1
1079	47.03.02.05	skin	0	1
1080	47.03.03	vascular organs	0	1
1081	47.03.03.02	vessels	0	1
1082	47.03.05	immune system organs	0	1
1083	47.03.05.01	thymus	0	1
1084	47.03.05.02	spleen	0	1
1085	47.03.05.03	lymphatic system	0	1
1086	47.03.07	excretory apparatus	0	1
1087	47.03.07.01	kidney	0	1
1088	47.03.07.03	malphigi	0	1
1089	47.03.07.05	pronephros (sensu Invertebrata)	0	1
1090	47.03.07.07	metanephros (sensu Invertebrata)	0	1
1091	47.03.09	respiratory system	0	1
1092	47.03.09.01	lung	0	1
1093	47.03.09.03	gill	0	1
1094	47.03.09.05	trachea (sensu Insecta)	0	1
1095	47.03.11	gastro-intestinal system	0	1
1096	47.03.11.01	tooth	0	1
1097	47.03.11.02	oesophagus	0	1
1098	47.03.11.03	stomach	0	1
1099	47.03.11.05	intestine	0	1
1100	47.03.11.07	liver	0	1
1101	47.03.11.09	pancreas	0	1
1102	47.03.11.11	gastro-intestinal system accessory organs	0	1
1103	47.03.13	dermis/cuticula	0	1
1104	47.03.13.05	hair / feather follicule	0	1
1105	47.03.15	reproductive apparatus	0	1
1106	47.03.15.01	female gonad (ovary)	0	1
1107	47.03.15.02	oviduct	0	1
1108	47.03.15.04	uterus	0	1
1109	47.03.15.04.03	cervix	0	1
1110	47.03.15.05	placenta	0	1
1111	47.03.15.07	male gonad (testis)	0	1
1112	47.03.17	skeletal system	0	1
1113	47.03.21	secretory organs (glands)	0	1
1114	47.03.21.01	mammary gland	0	1
1115	47.03.21.02	salivary gland	0	1
1116	47.03.21.03	endocrine organ	0	1
1117	47.03.21.03.01	adrenal gland	0	1
1118	47.03.21.03.02	pancreatic islet	0	1
1119	47.03.21.03.03	parathyroid	0	1
1120	47.03.21.03.04	pineal gland	0	1
1121	47.03.21.03.05	pituitary gland	0	1
1122	47.03.21.03.06	thyroid gland	0	1
1123	47.03.21.03.07	hypothalamus	0	1
1124	47.03.21.04	prostate gland	0	1
1125	47.03.21.05	sweat (perspiratory) gland	0	1
1126	70	SUBCELLULAR LOCALIZATION	0	1
1127	70.01	cell wall	0	1
1128	70.02	eukaryotic plasma membrane / membrane attached	0	1
1129	70.02.01	eukaryotic intracellular plasma membrane	0	1
1130	70.03	cytoplasm	0	1
1131	70.04	cytoskeleton	0	1
1132	70.04.03	actin cytoskeleton	0	1
1133	70.04.05	microtubule cytoskeleton	0	1
1134	70.04.07	intermediate filaments	0	1
1135	70.05	centrosome	0	1
1136	70.06	cell junction	0	1
1137	70.06.03	cell-substrate adherens junction	0	1
1138	70.06.04	intercellular junction (gap junction/adherens junction)	0	1
1139	70.07	endoplasmic reticulum	0	1
1140	70.08	Golgi	0	1
1141	70.09	intracellular transport vesicles	0	1
1142	70.1	nucleus	0	1
1143	70.10.03	chromosome	0	1
1144	70.10.04	centromere / kinetochore	0	1
1145	70.10.05	nuclear membrane	0	1
1146	70.10.06	nuclear matrix	0	1
1147	70.10.07	nucleolus	0	1
1148	70.10.09	nuclear speckles	0	1
1149	70.16	mitochondrion	0	1
1150	70.16.01	mitochondrial outer membrane	0	1
1151	70.16.03	mitochondrial intermembrane space	0	1
1152	70.16.05	mitochondrial inner membrane	0	1
1153	70.16.07	mitochondrial matrix	0	1
1154	70.19	peroxisome	0	1
1155	70.22	endosome	0	1
1156	70.25	vacuole or lysosome	0	1
1157	70.26	plastid	0	1
1158	70.26.03	chloroplast	0	1
1159	70.26.05	amyloplast	0	1
1160	70.26.07	chromoplast	0	1
1161	70.26.09	elaioplast	0	1
1162	70.26.11	etioplast	0	1
1163	70.26.13	leucoplast	0	1
1164	70.27	extracellular / secretion proteins	0	1
1165	70.27.01	extracellular matrix component	0	1
1166	70.27.03	cell membrane or cell wall attached	0	1
1167	70.28	periplasmatic space	0	1
1168	70.29	bud / growth tip	0	1
1169	70.3	prokaryotic cytoplasmic membrane	0	1
1170	70.32	flagellum	0	1
1171	70.33	pilus/fimbria	0	1
1172	70.34	prokaryotic cell envelope component	0	1
1173	70.34.01	bacterial outer membrane (only present in Gram- bacteria)	0	1
1174	70.34.03	capsule and slime layer	0	1
1175	70.34.05	S-Layer	0	1
1176	70.34.07	peptidoglycan layer or other prokaryotic cell wall	0	1
1177	70.34.09	spore or cyst coat	0	1
1178	70.35	prokaryotic intracytoplasmic membrane	0	1
1179	70.35.03	prokaryotic vesicular intracytoplasmic membrane	0	1
1180	70.35.05	prokaryotic tubular intracytoplasmic membrane	0	1
1181	70.35.07	prokaryotic thylakoid-like and thylakoid membrane	0	1
1182	70.36	prokaryotic cell inclusions	0	1
1183	70.36.03	carboxysomes	0	1
1184	70.36.05	gas vesicles	0	1
1185	70.36.07	sulfur globules or magnetosomes	0	1
1186	70.36.09	bacteriocins, rhapidosomes and protein crystals	0	1
1187	70.37	prokaryotic nucleoid	0	1
1188	73	CELL TYPE LOCALIZATION	0	1
1189	73.01	fungal / microorganismic cell type	0	1
1190	73.01.02	prokaryotic cell type	0	1
1191	73.01.02.01	free living cell or mycelium	0	1
1192	73.01.02.02	sporangial or cystophor cell	0	1
1193	73.01.02.03	heterocyste	0	1
1194	73.01.02.05	spores and other resting cell types	0	1
1195	73.01.02.05.01	endospore	0	1
1196	73.01.02.05.03	exospore, cyst, akinete or other resting cells	0	1
1197	73.01.02.11	swarmer and other mobile cells	0	1
1198	73.01.03	fungal and other eukaryotic cell types	0	1
1199	73.01.03.01	free swimming or amoeboid cell	0	1
1200	73.01.03.02	mycelial or yeast-like cell	0	1
1201	73.01.03.03	thallic, plasmodial or sporangiophore cell	0	1
1202	73.01.03.07	conidia	0	1
1203	73.01.03.09	asco- basidio- or zygospore	0	1
1204	73.02	plant cell type	0	1
1205	73.02.01	stem cell/meristematic cell	0	1
1206	73.02.05	specialized epidermal cell	0	1
1207	73.02.05.01	stomata/guard cell	0	1
1208	73.02.05.02	plant hair cell (trichome egcotton)	0	1
1209	73.02.05.03	root hair	0	1
1210	73.02.07	storage cell	0	1
1211	73.02.09	vascular cell	0	1
1212	73.02.09.01	sieve cell (phloem)	0	1
1213	73.02.09.02	companion cell (phloem)	0	1
1214	73.02.09.03	vessel element (xylem)	0	1
1215	73.02.13	strengthening cell	0	1
1216	73.02.13.01	sclerenchyma cell(dead)	0	1
1217	73.02.13.02	collenchyma cell (living)	0	1
1218	73.02.17	gametophytic cell	0	1
1219	73.02.17.01	male gametophyte	0	1
1220	73.02.17.01.01	generative pollen cell	0	1
1221	73.02.17.02	female gametophyte	0	1
1222	73.02.17.02.01	oocyte	0	1
1223	73.02.17.02.03	central cell (n)	0	1
1224	73.02.19	secretory cell	0	1
1225	73.03	animal cell type	0	1
1226	73.03.01	stem cell (toti- or pluripotent)	0	1
1227	73.03.02	germ cell	0	1
1228	73.03.03	pigment cell	0	1
1229	73.03.07	blood cell	0	1
1230	73.03.07.01	erythrocyte	0	1
1231	73.03.07.02	leucocyte	0	1
1232	73.03.07.02.01	lymphocyte	0	1
1233	73.03.07.02.01.01	B-cell	0	1
1234	73.03.07.02.01.02	T-cell	0	1
1235	73.03.07.02.01.03	NK cell	0	1
1236	73.03.07.02.02	granulocyte	0	1
1237	73.03.07.02.03	monocyte (macrophage, dendritic cell)	0	1
1238	73.03.07.03	platelet	0	1
1239	73.03.11	glia cell	0	1
1240	73.03.13	neuron	0	1
1241	73.03.15	secretory cell (mastcell, endocrine cell, etc)	0	1
1242	73.03.17	structural cell of tissue (fibroblast, osteoblast, etc)	0	1
1243	73.03.18	storage cell (lipocyte, etc)	0	1
1244	73.03.19	extracellular matrix forming cell (fibrocyte, chondrocyte, osteocyte)	0	1
1245	73.03.21	extracellular matrix degrading cell (chondroclast, osteoclast)	0	1
1246	73.03.23	sensory cell	0	1
1247	75	TISSUE LOCALIZATION	0	1
1248	75.01	fungal/microorganismic tissue	0	1
1249	75.01.01	reproductive tissue	0	1
1250	75.01.10	thallic tissue	0	1
1251	75.01.11	plectenchymatic tissue and tissue of primitive thalli (eghigher fungi)	0	1
1252	75.02	plant tissue	0	1
1253	75.02.01	meristematic tissue	0	1
1254	75.02.01.01	shoot apical meristem	0	1
1255	75.02.01.02	root meristem	0	1
1256	75.02.05	parenchyma	0	1
1257	75.02.09	dermal tissue	0	1
1258	75.02.09.01	epidermis	0	1
1259	75.02.09.03	rhizodermis	0	1
1260	75.02.09.05	secondary dermal tissue (cork, phellem)	0	1
1261	75.02.09.07	endodermis (with casparian band)	0	1
1262	75.02.13	vascular tissue	0	1
1263	75.02.15	thallus	0	1
1264	75.03	animal tissue	0	1
1265	75.03.03	proliferative tissue	0	1
1266	75.03.03.01	bone marrow	0	1
1267	75.03.04	adipose tissue	0	1
1268	75.03.05	connective tissue	0	1
1269	75.03.05.01	loose connective tissue / soft tissue	0	1
1270	75.03.05.03	fibrous connective tissue (tendons, ligaments)	0	1
1271	75.03.06	cartilage	0	1
1272	75.03.07	bone	0	1
1273	75.03.08	whole blood and lymph	0	1
1274	75.03.09	epithelium	0	1
1275	75.03.12	muscle	0	1
1276	75.03.12.01	striated muscle	0	1
1277	75.03.12.02	smooth muscle	0	1
1278	75.03.12.03	heart muscle	0	1
1279	75.03.15	reproductive tissue	0	1
1280	75.03.17	nervous tissue	0	1
1281	75.03.19	glandular tissue	0	1
1282	77	ORGAN LOCALIZATION	0	1
1283	77.01	fungal organ	0	1
1284	77.01.01	hyphe	0	1
1285	77.01.03	reproductive organ	0	1
1286	77.01.03.01	fruit body	0	1
1287	77.02	plant organ	0	1
1288	77.02.01	shoot	0	1
1289	77.02.01.01	stem	0	1
1290	77.02.01.02	leaf	0	1
1291	77.02.01.03	flower	0	1
1292	77.02.01.03.01	sepal	0	1
1293	77.02.01.03.02	petal	0	1
1294	77.02.01.03.03	anther	0	1
1295	77.02.01.03.04	carpel	0	1
1296	77.02.01.04	fruit	0	1
1297	77.02.01.05	seed	0	1
1298	77.02.01.05.01	embryo	0	1
1299	77.02.01.05.02	endosperm	0	1
1300	77.02.01.06	rhizome (potato tuber/onion)	0	1
1301	77.02.02	root	0	1
1302	77.03	animal organ	0	1
1303	77.03.01	nervous system	0	1
1304	77.03.01.01	central nervous system	0	1
1305	77.03.01.01.01	brain	0	1
1306	77.03.01.01.01.01	cerebrum	0	1
1307	77.03.01.01.01.02	cerebellum	0	1
1308	77.03.01.02	peripheral nervous system	0	1
1309	77.03.02	sensory organs	0	1
1310	77.03.02.01	ear	0	1
1311	77.03.02.02	eye	0	1
1312	77.03.02.03	nose	0	1
1313	77.03.02.04	tongue	0	1
1314	77.03.02.05	skin	0	1
1315	77.03.03	vascular organs	0	1
1316	77.03.03.02	vessels	0	1
1317	77.03.05	immune system organs	0	1
1318	77.03.05.01	thymus	0	1
1319	77.03.05.02	spleen	0	1
1320	77.03.05.03	lymphatic system	0	1
1321	77.03.07	excretory apparatus	0	1
1322	77.03.07.01	kidney	0	1
1323	77.03.07.03	malphigi	0	1
1324	77.03.07.05	pronephros (sensu Invertebrata)	0	1
1325	77.03.07.07	metanephros (sensu Invertebrata)	0	1
1326	77.03.09	respiratory system	0	1
1327	77.03.09.01	lung	0	1
1328	77.03.09.03	gill	0	1
1329	77.03.09.05	trachea (sensu Insecta)	0	1
1330	77.03.11	gastro-intestinal system	0	1
1331	77.03.11.01	teeth	0	1
1332	77.03.11.02	oesophagus	0	1
1333	77.03.11.03	stomach	0	1
1334	77.03.11.05	intestine	0	1
1335	77.03.11.07	liver	0	1
1336	77.03.11.09	pancreas	0	1
1337	77.03.11.11	gastro-intestinal system accessory organs	0	1
1338	77.03.13	dermis/cuticula	0	1
1339	77.03.13.05	hair / feather follicule	0	1
1340	77.03.15	reproductive apparatus	0	1
1341	77.03.15.01	female gonad (ovary)	0	1
1342	77.03.15.02	oviduct	0	1
1343	77.03.15.04	uterus	0	1
1344	77.03.15.04.03	cervix	0	1
1345	77.03.15.05	placenta	0	1
1346	77.03.15.07	male gonad (testis)	0	1
1347	77.03.17	skeletal system	0	1
1348	77.03.19	non organ cavities and their linings	0	1
1349	77.03.21	secretory organs (glands)	0	1
1350	77.03.21.01	mammary gland	0	1
1351	77.03.21.02	salivary gland	0	1
1352	77.03.21.03	endocrine organ	0	1
1353	77.03.21.03.01	adrenal gland	0	1
1354	77.03.21.03.02	pancreatic islet	0	1
1355	77.03.21.03.03	parathyroid	0	1
1356	77.03.21.03.04	pineal gland	0	1
1357	77.03.21.03.05	pituitary gland	0	1
1358	77.03.21.03.06	thyroid gland	0	1
1359	77.03.21.04	prostate gland	0	1
1360	77.03.21.05	sweat (perspiratory) gland	0	1
1361	98	CLASSIFICATION NOT YET CLEAR-CUT	0	1
1362	99	UNCLASSIFIED PROTEINS	108	1	NCU00292 NCU00309 NCU00633 NCU00709 NCU00729 NCU00761 NCU00763 NCU00811 NCU00870 NCU00871 NCU00992 NCU01013 NCU01049 NCU01058 NCU01076 NCU01136 NCU01211 NCU01386 NCU01430 NCU01720 NCU01742 NCU01769 NCU01900 NCU01944 NCU01983 NCU02061 NCU02485 NCU02625 NCU02882 NCU03131 NCU03181 NCU03293 NCU03322 NCU03552 NCU04058 NCU04169 NCU04170 NCU04467 NCU04522 NCU04542 NCU04543 NCU04557 NCU04603 NCU04904 NCU…

## Sheet: Funcat_173 genes
Order	Funcat	Category	173	P-value	NCUs
1	1	METABOLISM	25	0.728801	NCU00244 NCU00585 NCU01861 NCU01868 NCU02046 NCU02969 NCU03049 NCU03188 NCU04474 NCU04539 NCU04865 NCU05006 NCU05239 NCU05851 NCU06005 NCU06153 NCU07067 NCU07176 NCU07434 NCU08128 NCU08152 NCU08699 NCU09272 NCU09274 NCU09281
2	1.01	amino acid metabolism	1	0.994297	NCU05851
3	01.01.03	assimilation of ammonia, metabolism of the glutamate group	0	1
4	01.01.03.01	metabolism of glutamine	0	1
5	01.01.03.01.01	biosynthesis of glutamine	0	1
6	01.01.03.01.02	degradation of glutamine	0	1
7	01.01.03.02	metabolism of glutamate	0	1
8	01.01.03.02.01	biosynthesis of glutamate	0	1
9	01.01.03.02.02	degradation of glutamate	0	1
10	01.01.03.03	metabolism of proline	0	1
11	01.01.03.03.01	biosynthesis of proline	0	1
12	01.01.03.03.02	degradation of proline	0	1
13	01.01.03.04	metabolism of -hydroxyproline	0	1
14	01.01.03.04.01	biosynthesis of -hydroxyproline	0	1
15	01.01.03.04.02	degradation of -hydroxyproline	0	1
16	01.01.03.05	metabolism of arginine	0	1
17	01.01.03.05.01	biosynthesis of arginine	0	1
18	01.01.03.05.02	degradation of arginine	0	1
19	01.01.05	metabolism of urea cycle, creatine and polyamines	0	1
20	01.01.05.01	metabolism of polyamines	0	1
21	01.01.05.01.01	biosynthesis of polyamines	0	1
22	01.01.05.01.02	degradation of polyamines	0	1
23	01.01.05.02	metabolism of creatine	0	1
24	01.01.05.02.01	biosynthesis of creatine	0	1
25	01.01.05.02.02	degradation of creatine	0	1
26	01.01.05.03	metabolism of urea (urea cycle)	0	1
27	01.01.06	metabolism of the aspartate family	0	1
28	01.01.06.01	metabolism of aspartate	0	1
29	01.01.06.01.01	biosynthesis of aspartate	0	1
30	01.01.06.01.02	degradation of aspartate	0	1
31	01.01.06.02	metabolism of asparagine	0	1
32	01.01.06.02.01	biosynthesis of asparagine	0	1
33	01.01.06.02.02	degradation of asparagine	0	1
34	01.01.06.04	metabolism of threonine	0	1
35	01.01.06.04.01	biosynthesis of threonine	0	1
36	01.01.06.04.02	degradation of threonine	0	1
37	01.01.06.05	metabolism of methionine	0	1
38	01.01.06.05.01	biosynthesis of methionine	0	1
39	01.01.06.05.01.01	biosynthesis of homocysteine	0	1
40	01.01.06.05.01.02	degradation of homocysteine	0	1
41	01.01.06.05.02	degradation of methionine	0	1
42	01.01.06.06	metabolism of lysine	0	1
43	01.01.06.06.01	biosynthesis of lysine	0	1
44	01.01.06.06.01.01	diaminopimelic acid pathway	0	1
45	01.01.06.06.01.03	aminoadipic acid pathway	0	1
46	01.01.06.06.02	degradation of lysine	0	1
47	01.01.09	metabolism of the cysteine - aromatic group	1	0.830764	NCU05851
48	01.01.09.01	metabolism of glycine	0	1
49	01.01.09.01.01	biosynthesis of glycine	0	1
50	01.01.09.01.02	degradation of glycine	0	1
51	01.01.09.02	metabolism of serine	0	1
52	01.01.09.02.01	biosynthesis of serine	0	1
53	01.01.09.02.02	degradation of serine	0	1
54	01.01.09.03	metabolism of cysteine	0	1
55	01.01.09.03.01	biosynthesis of cysteine	0	1
56	01.01.09.03.02	degradation of cysteine	0	1
57	01.01.09.04	metabolism of phenylalanine	1	0.357507	NCU05851
58	01.01.09.04.01	biosynthesis of phenylalanine	1	0.21933	NCU05851
59	01.01.09.04.02	degradation of phenylalanine	1	0.176766	NCU05851
60	01.01.09.05	metabolism of tyrosine	0	1
61	01.01.09.05.01	biosynthesis of tyrosine	0	1
62	01.01.09.05.02	degradation of tyrosine	0	1
63	01.01.09.06	metabolism of tryptophan	0	1
64	01.01.09.06.01	biosynthesis of tryptophan	0	1
65	01.01.09.06.02	degradation of tryptophan	0	1
66	01.01.09.07	metabolism of histidine	0	1
67	01.01.09.07.01	biosynthesis of histidine	0	1
68	01.01.09.07.02	degradation of histidine	0	1
69	01.01.11	metabolism of the pyruvate family (alanine, isoleucine, leucine, valine) and D-alanine	0	1
70	01.01.11.01	metabolism of alanine	0	1
71	01.01.11.01.01	biosynthesis of alanine	0	1
72	01.01.11.01.02	degradation of alanine	0	1
73	01.01.11.02	metabolism of isoleucine	0	1
74	01.01.11.02.01	biosynthesis of isoleucine	0	1
75	01.01.11.02.02	degradation of isoleucine	0	1
76	01.01.11.03	metabolism of valine	0	1
77	01.01.11.03.01	biosynthesis of valine	0	1
78	01.01.11.03.02	degradation of valine	0	1
79	01.01.11.04	metabolism of leucine	0	1
80	01.01.11.04.01	biosynthesis of leucine	0	1
81	01.01.11.04.02	degradation of leucine	0	1
82	01.01.11.06	metabolism of the D-alanine amino acid group	0	1
83	01.01.11.07	metabolism of the hydroxyamino acid group	0	1
84	01.01.13	regulation of amino acid metabolism	0	1
85	1.02	nitrogen, sulfur and selenium metabolism	1	0.901036	NCU04474
86	01.02.02	nitrogen metabolism	0	1
87	01.02.02.01	nitrogen fixation	0	1
88	01.02.02.02	nitrate assimilation	0	1
89	01.02.02.03	nitrate dissimilation	0	1
90	01.02.02.05	ammonium nitrification	0	1
91	01.02.02.06	assimilation of ammonia	0	1
92	01.02.02.07	nitric oxide biosynthesis	0	1
93	01.02.02.09	catabolism of nitrogenous compounds	0	1
94	01.02.02.09.01	urea catabolism (not urea cycle)	0	1
95	01.02.02.09.03	urate catabolism	0	1
96	01.02.02.09.05	cyanate catabolism	0	1
97	01.02.02.09.06	anthranilate catabolism	0	1
98	01.02.02.09.07	formamide catabolism	0	1
99	01.02.02.09.08	nitriles catabolism	0	1
100	01.02.03	sulfur metabolism	0	1
101	01.02.03.01	sulfate assimilation	0	1
102	01.02.03.03	assimilatory reduction of sulfur	0	1
103	01.02.03.04	conjunction of sulfate	0	1
104	01.02.03.05	oxidation of sulfur to sulfate, electron as energy source	0	1
105	01.02.03.06	sulfate dissimilation, anaerobic respiration, sulfate respiration	0	1
106	01.02.05	selenium metabolism	0	1
107	01.02.07	regulation of nitrogen, sulfur and selenium metabolism	0	1
108	01.02.07.01	regulation of nitrogen metabolism	0	1
109	01.02.07.03	regulation of sulphur metabolism	0	1
110	01.02.07.05	regulation of selenium metabolism	0	1
111	1.03	nucleotide/nucleoside/nucleobase metabolism	0	1
112	01.03.01	purin nucleotide/nucleoside/nucleobase metabolism	0	1
113	01.03.01.01	purine nucleotide /nucleoside/nucleobase catabolism	0	1
114	01.03.01.01.01	hypoxanthine catabolism	0	1
115	01.03.01.01.03	xanthine catabolism	0	1
116	01.03.01.03	purine nucleotide/nucleoside/nucleobase anabolism	0	1
117	01.03.04	pyrimidine nucleotide/nucleoside/nucleobase metabolism	0	1
118	01.03.04.01	pyrimidine nucleotide/nucleoside/nucleobase catabolism	0	1
119	01.03.04.03	pyrimidine nucleotide/nucleoside/nucleobase anabolism	0	1
120	01.03.07	deoxyribonucleotide metabolism	0	1
121	01.03.10	metabolism of cyclic and unusual nucleotides	0	1
122	01.03.13	regulation of nucleotide/nucleoside/nucleobase metabolism	0	1
123	01.03.16	polynucleotide degradation	0	1
124	01.03.16.01	RNA degradation	0	1
125	01.03.16.03	DNA degradation	0	1
126	1.04	phosphate metabolism	1	0.991175	NCU06005
127	01.04.04	regulation of phosphate metabolism	0	1
128	1.05	C-compound and carbohydrate metabolism	13	0.442821	NCU00244 NCU01861 NCU01868 NCU02046 NCU03188 NCU04539 NCU05239 NCU05851 NCU06005 NCU06153 NCU07067 NCU08152 NCU09281
129	01.05.02	sugar, glucoside, polyol and carboxylate metabolism	1	0.92437	NCU02046
130	01.05.02.01	nucleotide-sugar metabolism	0	1
131	01.05.02.04	sugar, glucoside, polyol and carboxylate anabolism	0	1
132	01.05.02.07	sugar, glucoside, polyol and carboxylate catabolism	1	0.877321	NCU02046
133	01.05.03	polysaccharide metabolism	3	0.521699	NCU00244 NCU05239 NCU09281
134	01.05.03.01	glycogen metabolism	0	1
135	01.05.03.01.04	glycogen anabolism	0	1
136	01.05.03.01.07	glycogen catabolism	0	1
137	01.05.03.02	peptidoglycan metabolism	0	1
138	01.05.03.02.04	peptidoglycan anabolism	0	1
139	01.05.03.02.07	peptidoglycan catabolism	0	1
140	01.05.03.03	chitin metabolism	0	1
141	01.05.03.03.04	chitin anabolism	0	1
142	01.05.03.03.07	chitin catabolism	0	1
143	01.05.03.04	starch metabolism	0	1
144	01.05.03.04.04	starch anabolism	0	1
145	01.05.03.04.07	starch catabolism	0	1
146	01.05.05	C- compound metabolism	0	1
147	01.05.05.04	C- compound anabolism	0	1
148	01.05.05.07	C- compound catabolism	0	1
149	01.05.05.07.01	serine-isocitrate lyase pathway	0	1
150	01.05.05.07.03	ribulose-monophosphate cycle	0	1
151	01.05.06	C- compound and organic acid metabolism	0	1
152	01.05.06.04	C- compound and organic acid anabolism	0	1
153	01.05.06.07	C- compound and organic acid catabolism	0	1
154	01.05.07	C- compound metabolism	1	0.084595	NCU06005
155	01.05.07.04	C- compound anabolism	0	1
156	01.05.07.07	C- compound catabolism	0	1
157	01.05.08	C- compound metabolism	0	1
158	01.05.08.04	C- compound anabolism	0	1
159	01.05.08.07	C- compound catabolism	0	1
160	01.05.09	aminosaccharide metabolism	0	1
161	01.05.09.04	aminosaccharide anabolism	0	1
162	01.05.09.07	aminosaccharide catabolism	0	1
163	01.05.10	aliphatic hydrocarbon metabolism	0	1
164	01.05.10.04	aliphatic hydrocarbon anabolism	0	1
165	01.05.10.07	aliphatic hydrocarbon catabolism	0	1
166	01.05.11	aromate metabolism	1	0.507561	NCU06153
167	01.05.11.04	aromate anabolism	0	1
168	01.05.11.07	aromate catabolism	1	0.442452	NCU06153
169	01.05.11.07.01	aerobic aromate catabolism	1	0.442452	NCU06153
170	01.05.11.07.01.01	ortho-cleavage	0	1
171	01.05.11.07.01.03	meta-cleavage	0	1
172	01.05.11.07.02	anaerobic aromate catabolism	0	1
173	01.05.12	autotrophic CO-fixation	0	1
174	01.05.12.01	Calvin cycle	0	1
175	01.05.12.03	reductive TCA cycle	0	1
176	01.05.12.05	hydroxypropionate pathway	0	1
177	01.05.12.07	acetyl-CoA pathway	0	1
178	01.05.13	transfer of activated C- groups	0	1
179	01.05.13.01	S-adenosyl-methionine - homocysteine cycle	0	1
180	01.05.13.03	tetrahydrofolate-dependent C--transfer	0	1
181	01.05.25	regulation of C-compound and carbohydrate metabolism	1	0.762484	NCU08152
182	1.06	lipid, fatty acid and isoprenoid metabolism	9	0.180635	NCU00585 NCU02969 NCU05006 NCU06005 NCU07434 NCU08128 NCU08699 NCU09272 NCU09274
183	01.06.02	membrane lipid metabolism	1	0.565106	NCU06005
184	01.06.02.01	phospholipid metabolism	1	0.480638	NCU06005
185	01.06.02.02	glycolipid metabolism	1	0.21933	NCU06005
186	01.06.02.03	sphingolipid metabolism	0	1
187	01.06.05	fatty acid metabolism	1	0.689759	NCU05006
188	01.06.06	isoprenoid metabolism	3	0.120265	NCU00585 NCU08128 NCU09272
189	01.06.06.01	hemiterpenes metabolism	0	1
190	01.06.06.03	monoterpenes metabolism	0	1
191	01.06.06.05	sesquiterpenes metabolism	1	0.0682655	NCU08128
192	01.06.06.07	diterpenes metabolism	1	0.0347325	NCU09272
193	01.06.06.09	triterpenes metabolism	0	1
194	01.06.06.11	tetracyclic and pentacyclic triterpenes (cholesterin, steroids and hopanoids) metabolism	0	1
195	01.06.06.13	tetraterpenes (carotinoids) metabolism	1	0.0516463	NCU00585
196	01.06.06.15	polyterpenes metabolism	0	1
197	01.06.10	regulation of lipid, fatty acid and isoprenoid metabolism	0	1
198	1.07	metabolism of vitamins, cofactors, and prosthetic groups	1	0.945258	NCU03188
199	01.07.01	biosynthesis of vitamins, cofactors, and prosthetic groups	1	0.830764	NCU03188
200	01.07.03	catabolism of vitamins, cofactors, and prosthetic groups	0	1
201	01.07.04	utilization of vitamins, cofactors, and prosthetic groups	0	1
202	01.07.07	regulation of the metabolism of vitamins, cofactors, and prosthetic groups	0	1
203	1.08	metabolism of intercellular mediators	0	1
204	01.08.01	metabolism of neurotransmitters	0	1
205	01.08.02	metabolism of hormones	0	1
206	01.08.03	metabolism of cytokines and growth factors	0	1
207	01.08.04	regulation of the metabolism of intercellular mediators	0	1
208	1.2	secondary metabolism	3	0.482184	NCU01861 NCU04865 NCU05851
209	01.20.01	metabolism of primary metabolic sugar derivatives	0	1
210	01.20.01.01	metabolism of secondary monosaccharides	0	1
211	01.20.01.03	metabolism of sugar carboxylic acids	0	1
212	01.20.01.05	metabolism of sugar alcohols	0	1
213	01.20.01.07	metabolism of glycosides	0	1
214	01.20.01.09	metabolism of aminoglycoside antibiotics	0	1
215	01.20.03	metabolism of derivatives of intermediates of glucose degradation	0	1
216	01.20.05	metabolism of acetic acid derivatives	1	0.233026	NCU04865
217	01.20.05.01	metabolism of acetoacetate, acetone, hydroxybutyric acid	0	1
218	01.20.05.03	metabolism of alkanes, alkenes, alkanals, alkanols	0	1
219	01.20.05.05	metabolism of fatty acid esters	0	1
220	01.20.05.07	metabolism of acetylenes	0	1
221	01.20.05.09	metabolism of eicosanoids	0	1
222	01.20.05.11	metabolism of polyketides	1	0.116405	NCU04865
223	01.20.07	metabolism of propionic acid derivatives	0	1
224	01.20.09	metabolism of derivatives of intermediates of the TCA and glyoxylate pathway	0	1
225	01.20.13	metabolism of derivatives of homoisopentenyl pyrophosphate	0	1
226	01.20.15	metabolism of derivatives of dehydroquinic acid, shikimic acid and chorismic acid	0	1
227	01.20.15.01	metabolism of naphthoquinone, anthraquinone	0	1
228	01.20.15.03	metabolism of ubiquinone	0	1
229	01.20.17	metabolism of secondary products derived from primary amino acids	1	0.471343	NCU01861
230	01.20.17.01	metabolism of nonprotein amino acids	0	1
231	01.20.17.03	metabolism of amines	0	1
232	01.20.17.05	metabolism of cyanogenic glycosides	0	1
233	01.20.17.07	metabolism of glycosinolates and derivatives	0	1
234	01.20.17.09	metabolism of alkaloids	1	0.233026	NCU01861
235	01.20.19	metabolism of secondary products derived from glycine, L-serine and L-alanine	0	1
236	01.20.19.01	metabolism of porphyrins	0	1
237	01.20.19.03	metabolism of open-chain tetrapyrrols	0	1
238	01.20.19.05	metabolism of cobalamins	0	1
239	01.20.21	metabolism of sulfuric acid and L-cysteine derivatives	0	1
240	01.20.23	metabolism of secondary products derived from L-methionine	0	1
241	01.20.25	metabolism of secondary products derived from L-valin, L-leucin and L-isoleucin	0	1
242	01.20.27	metabolism of secondary products derived from L-aspartic acid and L-threonine	0	1
243	01.20.29	metabolism of secondary products derived from L-glutamic acid, L-proline and L-ornithine	0	1
244	01.20.31	metabolism of secondary products derived from L-lysine, L-arginine and L-histidine	0	1
245	01.20.33	metabolism of secondary products derived from L-tryptophan	0	1
246	01.20.35	metabolism of secondary products derived from L-phenylalanine and L-tyrosine	1	0.390772	NCU05851
247	01.20.35.01	metabolism of phenylpropanoids	1	0.346022	NCU05851
248	01.20.35.01.01	metabolism of melanins	0	1
249	01.20.35.01.03	metabolism of lignins	0	1
250	01.20.35.01.05	metabolism of stilbenes, flavonoids	0	1
251	01.20.35.01.07	metabolism of coumarins	0	1
252	01.20.35.01.09	metabolism of cinnamic acids	0	1
253	01.20.35.02	metabolism of thyroids	0	1
254	01.20.35.03	metabolism of catecholamines	0	1
255	01.20.36	non-ribosomal peptide synthesis	0	1
256	01.20.37	metabolism of peptide derived compounds	0	1
257	01.20.37.01	metabolism of thioredoxin, glutaredoxin, glutathion	0	1
258	01.20.37.03	metabolism of peptide antibiotics	0	1
259	01.20.37.05	metabolism of beta-lactams	0	1
260	01.20.38	metabolism of toxins/drugs	0	1
261	01.20.70	regulation of secondary metabolism	0	1
262	1.25	extracellular metabolism	0	1
263	01.25.01	extracellular polysaccharide degradation	0	1
264	01.25.03	extracellular protein degradation	0	1
265	01.25.05	extracellular polynucleotide degradation	0	1
266	01.25.07	extracellular ester compound degradation	0	1
267	01.25.09	extracellular lignin degradation	0	1
268	01.25.11	extracellular aminosaccharide degradation	0	1
269	2	ENERGY	0	1
270	2.01	glycolysis and gluconeogenesis	0	1
271	02.01.01	glycolysis methylglyoxal bypass	0	1
272	02.01.03	regulation of glycolysis and gluconeogenesis	0	1
273	2.04	glyoxylate cycle	0	1
274	2.05	Entner-Doudoroff pathway	0	1
275	2.07	pentose-phosphate pathway	0	1
276	02.07.01	pentose-phosphate pathway oxidative branch	0	1
277	02.07.03	pentose-phosphate pathway non oxidative branch	0	1
278	02.07.05	regulation of pentose-phosphate pathway	0	1
279	2.08	pyruvate dehydrogenase complex	0	1
280	2.09	anaplerotic reactions	0	1
281	2.1	tricarboxylic-acid pathway (citrate cycle, Krebs cycle, TCA cycle)	0	1
282	2.11	electron transport and membrane-associated energy conservation	0	1
283	02.11.05	accessory proteins of electron transport and membrane-associated energy conservation	0	1
284	02.11.07	regulation of electron transport and membrane-associated energy conservation	0	1
285	2.13	respiration	0	1
286	02.13.01	anaerobic respiration	0	1
287	02.13.03	aerobic respiration	0	1
288	02.13.05	regulation of respiration	0	1
289	2.16	fermentation	0	1
290	02.16.01	alcohol fermentation	0	1
291	02.16.01.01	bacterial type ethanol fermentation	0	1
292	02.16.03	lactate fermentation	0	1
293	02.16.03.01	homofermentative pathway	0	1
294	02.16.03.03	heterofermentative pathway and fermentaton of other saccharides	0	1
295	02.16.03.05	bifidum pathway	0	1
296	02.16.03.07	malo-lactate fermentation	0	1
297	02.16.05	butyrate and butanol-acetoine fermentation	0	1
298	02.16.07	ethanol-acetate fermentation	0	1
299	02.16.09	mixed acid and butanediol fermentation	0	1
300	02.16.11	propionate fermentation	0	1
301	02.16.11.01	acrylate pathway	0	1
302	02.16.11.03	succinate-propionate pathway	0	1
303	02.16.13	acetate fermentation	0	1
304	02.16.15	methane fermentation	0	1
305	02.16.17	fermentation of nitrogenous compounds	0	1
306	02.16.17.01	single amino acid fermentations	0	1
307	02.16.17.03	stickland reactions	0	1
308	02.16.17.05	fermentation of heterocyclic compounds	0	1
309	02.16.20	regulation of fermentation	0	1
310	2.17	chemolithotrophy (egsulfide, nitrogenous compounds)	0	1
311	2.19	metabolism of energy reserves (egglycogen, trehalose)	0	1
312	2.25	oxidation of fatty acids	0	1
313	2.3	photosynthesis	0	1
314	02.30.01	anoxygenic photosynthesis	0	1
315	02.30.03	oxygenic photosynthesis	0	1
316	02.30.07	accessory proteins of photosynthetic electron transport	0	1
317	02.30.10	regulation of photosynthesis	0	1
318	2.45	energy conversion and regeneration	0	1
319	02.45.01	bioluminescence	0	1
320	02.45.03	light absorption	0	1
321	02.45.07	heat production	0	1
322	02.45.11	conversion to kinetic energy (egmovement)	0	1
323	02.45.15	energy generation (egATP synthase)	0	1
324	02.45.20	regulation of energy conversion / regeneration	0	1
325	4	STORAGE PROTEIN	0	1
326	4.01	storage facilitating proteins	0	1
327	4.02	stored proteins	0	1
328	10	CELL CYCLE AND DNA PROCESSING	6	0.927012	NCU05239 NCU07498 NCU07519 NCU07837 NCU08626 NCU08850
329	10.01	DNA processing	5	0.599269	NCU07498 NCU07519 NCU07837 NCU08626 NCU08850
330	10.01.01	cellular DNA uptake	0	1
331	10.01.01.01	bacterial competence	0	1
332	10.01.01.03	conjugational DNA transfer	0	1
333	10.01.02	DNA topology	0	1
334	10.01.03	DNA synthesis and replication	0	1
335	10.01.03.03	ori recognition and priming complex formation	0	1
336	10.01.03.05	extension/ polymerization activity	0	1
337	10.01.05	DNA recombination and DNA repair	5	0.160715	NCU07498 NCU07519 NCU07837 NCU08626 NCU08850
338	10.01.05.01	DNA repair	5	0.0862507	NCU07498 NCU07519 NCU07837 NCU08626 NCU08850
339	10.01.05.03	DNA recombination	0	1
340	10.01.05.03.01	meiotic recombination	0	1
341	10.01.05.03.03	somatic / mitotic recombination	0	1
342	10.01.05.03.05	DNA integration	0	1
343	10.01.09	DNA restriction or modification	0	1
344	10.01.09.01	DNA methylation	0	1
345	10.01.09.03	DNA restriction	0	1
346	10.01.09.05	DNA conformation modification (egchromatin)	0	1
347	10.01.09.07	DNA imprinting and other epigenetic effects	0	1
348	10.01.11	regulation of DNA processing	0	1
349	10.03	cell cycle	1	0.998442	NCU05239
350	10.03.01	mitotic cell cycle and cell cycle control	0	1
351	10.03.01.01	mitotic cell cycle	0	1
352	10.03.01.01.01	G phase of mitotic cell cycle	0	1
353	10.03.01.01.02	G/G transition, mitotic exit	0	1
354	10.03.01.01.03	G/S transition of mitotic cell cycle	0	1
355	10.03.01.01.05	S phase of mitotic cell cycle	0	1
356	10.03.01.01.07	G phase of mitotic cell cycle	0	1
357	10.03.01.01.09	G/M transition of mitotic cell cycle	0	1
358	10.03.01.01.11	M phase	0	1
359	10.03.01.01.13	M/G transition of mitotic cell cycle	0	1
360	10.03.01.02	cell cycle arrest	0	1
361	10.03.01.03	cell cycle checkpoints (checkpoints of morphogenesis, DNA-damage,-replication, mitotic phase and spindle)	0	1
362	10.03.02	meiosis	0	1
363	10.03.02.01	meiosis I	0	1
364	10.03.02.03	meiosis II	0	1
365	10.03.03	cytokinesis (cell division) /septum formation and hydrolysis	1	0.76668	NCU05239
366	10.03.04	nuclear and chromosomal cycle	0	1
367	10.03.04.01	centromere/kinetochore complex maturation	0	1
368	10.03.04.03	chromosome condensation	0	1
369	10.03.04.05	chromosome segregation/division	0	1
370	10.03.04.06	chromosome inactivation	0	1
371	10.03.04.07	nuclear division	0	1
372	10.03.04.09	nuclear migration	0	1
373	10.03.05	cell cycle dependent cytoskeleton reorganization	0	1
374	10.03.05.01	spindle pole body/centrosome and microtubule cycle	0	1
375	10.03.05.03	cell cycle dependent actin filament reorganization	0	1
376	11	TRANSCRIPTION	6	0.971314	NCU01572 NCU02724 NCU03043 NCU04986 NCU07617 NCU08726
377	11.02	RNA synthesis	6	0.841128	NCU01572 NCU02724 NCU03043 NCU04986 NCU07617 NCU08726
378	11.02.01	rRNA synthesis	1	0.572761	NCU04986
379	11.02.02	tRNA synthesis	1	0.432477	NCU04986
380	11.02.03	mRNA synthesis	5	0.855402	NCU01572 NCU02724 NCU03043 NCU07617 NCU08726
381	11.02.03.01	general transcription activities	0	1
382	11.02.03.01.01	transcription initiation	0	1
383	11.02.03.01.04	transcription elongation	0	1
384	11.02.03.01.07	transcription termination	0	1
385	11.02.03.04	transcriptional control	5	0.651258	NCU01572 NCU02724 NCU03043 NCU07617 NCU08726
386	11.02.03.04.01	transcription activation	1	0.422325	NCU08726
387	11.02.03.04.03	transcription repression	0	1
388	11.02.03.04.05	enhancer/silencer interaction	0	1
389	11.02.03.04.07	posttranscriptional control	0	1
390	11.04	RNA processing	0	1
391	11.04.01	rRNA processing	0	1
392	11.04.02	tRNA processing	0	1
393	11.04.03	mRNA processing (splicing, '-, '-end processing)	0	1
394	11.04.03.01	splicing	0	1
395	11.04.03.01.10	regulation of splicing	0	1
396	11.04.03.03	'-end processing	0	1
397	11.04.03.05	'-end processing	0	1
398	11.04.03.11	control of mRNA stability	0	1
399	11.04.05	RNA topology	0	1
400	11.06	RNA modification	0	1
401	11.06.01	rRNA modification	0	1
402	11.06.02	tRNA modification	0	1
403	11.06.03	mRNA modification	0	1
404	11.06.03.01	mRNA editing	0	1
405	12	PROTEIN SYNTHESIS	0	1
406	12.01	ribosome biogenesis	0	1
407	12.01.01	ribosomal proteins	0	1
408	12.04	translation	0	1
409	12.04.01	translation initiation	0	1
410	12.04.02	translation elongation	0	1
411	12.04.03	translation termination	0	1
412	12.07	translational control	0	1
413	12.1	aminoacyl-tRNA-synthetases	0	1
414	12.11	selenocystein biosynthesis and incorporation	0	1
415	14	PROTEIN FATE (folding, modification, destination)	4	0.999624	NCU01268 NCU04233 NCU06252 NCU07476
416	14.01	protein folding and stabilization	0	1
417	14.04	protein targeting, sorting and translocation	0	1
418	14.07	protein modification	4	0.954004	NCU01268 NCU04233 NCU06252 NCU07476
419	14.07.01	modification with fatty acids (egmyristylation, palmitylation, farnesylation)	0	1
420	14.07.02	modification with sugar residues (egglycosylation, deglycosylation)	0	1
421	14.07.02.01	O-directed glycosylation, deglycosylation	0	1
422	14.07.02.02	N-directed glycosylation, deglycosylation	0	1
423	14.07.03	modification by phosphorylation, dephosphorylation, autophosphorylation	2	0.722314	NCU04233 NCU06252
424	14.07.04	modification by acetylation, deacetylation	1	0.390772	NCU07476
425	14.07.05	modification by ubiquitination, deubiquitination	1	0.654815	NCU01268
426	14.07.07	modification by ubiquitin-related proteins	0	1
427	14.07.09	posttranslational modification of amino acids (eghydroxylation, methylation)	0	1
428	14.07.11	protein processing (proteolytic)	0	1
429	14.07.11.01	autoproteolytic processing	0	1
430	14.07.12	protein processing (non-proteolytic, egiron-incorporation)	0	1
431	14.1	assembly of protein complexes	0	1
432	14.13	protein/peptide degradation	1	0.972388	NCU01268
433	14.13.01	cytoplasmic and nuclear protein degradation	1	0.870558	NCU01268
434	14.13.01.01	proteasomal degradation (ubiquitin/proteasomal pathway)	1	0.76668	NCU01268
435	14.13.04	lysosomal and vacuolar protein degradation	0	1
436	14.13.04.01	lysosomal protein degradation	0	1
437	14.13.04.02	vacuolar protein degradation	0	1
438	16	PROTEIN WITH BINDING FUNCTION OR COFACTOR REQUIREMENT (structural or catalytic)	7	0.999973	NCU00290 NCU01268 NCU01861 NCU02724 NCU03043 NCU03188 NCU06005
439	16.01	protein binding	1	0.999988	NCU01268
440	16.01.01	receptor binding	0	1
441	16.02	peptide binding	0	1
442	16.03	nucleic acid binding	2	0.975909	NCU02724 NCU03043
443	16.03.01	DNA binding	2	0.736276	NCU02724 NCU03043
444	16.03.03	RNA binding	0	1
445	16.05	polysaccharide binding	0	1
446	16.06	motor protein binding	0	1
447	16.07	structural protein binding	0	1
448	16.09	lipid binding	0	1
449	16.1	amine binding	0	1
450	16.11	amino acid/amino acid derivatives binding	0	1
451	16.12	sulfate binding	0	1
452	16.13	C-compound binding	0	1
453	16.13.01	sugar binding	0	1
454	16.13.03	fatty acid binding (egacyl-carrier protein)	0	1
455	16.14	selen binding	0	1
456	16.15	drug/toxin binding	0	1
457	16.16	antigen binding	0	1
458	16.17	metal binding	0	1
459	16.17.01	calcium binding	0	1
460	16.17.03	potassium binding	0	1
461	16.17.05	sodium binding	0	1
462	16.17.07	magnesium binding	0	1
463	16.17.09	heavy metal binding (Cu, Fe, Zn)	0	1
464	16.18	virus particle binding	0	1
465	16.19	nucleotide/nucleoside/nucleobase binding	3	0.958665	NCU00290 NCU01268 NCU06005
466	16.19.01	cyclic nucleotide binding (cAMP, cGMP, etc)	0	1
467	16.19.03	ATP binding	3	0.86516	NCU00290 NCU01268 NCU06005
468	16.19.05	GTP binding	0	1
469	16.21	complex cofactor/cosubstrate/vitamine binding	2	0.839245	NCU01861 NCU03188
470	16.21.01	heme binding	0	1
471	16.21.03	molybdopterin binding	0	1
472	16.21.05	FAD/FMN binding	1	0.549384	NCU03188
473	16.21.07	NAD/NADP binding	1	0.80824	NCU01861
474	16.21.08	Fe/S binding	0	1
475	16.21.09	cobalamine binding	0	1
476	16.21.11	thiamine pyrophosphate binding	0	1
477	16.21.13	lipoamide binding	0	1
478	16.21.15	biotin binding	0	1
479	16.21.17	pyridoxal phosphate binding	0	1
480	16.22	hormone binding	0	1
481	16.23	neurotransmitter binding	0	1
482	16.25	oxygen binding	0	1
483	18	REGULATION OF METABOLISM AND PROTEIN FUNCTION	0	1
484	18.01	regulation by	0	1
485	18.01.01	regulation by modification	0	1
486	18.01.03	regulation by localization	0	1
487	18.01.05	regulation by processing	0	1
488	18.01.07	regulation by binding / dissociation	0	1
489	18.02	regulation of protein activity	0	1
490	18.02.01	enzymatic activity regulation / enzyme regulator	0	1
491	18.02.01.01	enzyme activator	0	1
492	18.02.01.01.01	GTPase activator (GAP)	0	1
493	18.02.01.01.03	protease activator	0	1
494	18.02.01.01.05	kinase activator	0	1
495	18.02.01.02	enzyme inhibitor	0	1
496	18.02.01.02.01	GTPase inhibitor (GIP)	0	1
497	18.02.01.02.03	protease inhibitor	0	1
498	18.02.01.02.05	kinase inhibitior	0	1
499	18.02.03	guanyl-nucleotide exchange factor (GEF)	0	1
500	18.02.05	regulator of G-protein signalling	0	1
501	18.02.07	regulator of receptor activity	0	1
502	18.02.09	regulator of transcription factor	0	1
503	18.02.10	regulation of channel activity	0	1
504	20	CELLULAR TRANSPORT, TRANSPORT FACILITATION AND TRANSPORT ROUTES	11	0.909891	NCU00290 NCU00755 NCU01868 NCU03107 NCU04374 NCU06005 NCU07564 NCU07609 NCU08152 NCU08880 NCU09274
505	20.01	transported compounds (substrates)	8	0.827673	NCU00755 NCU01868 NCU04374 NCU07564 NCU07609 NCU08152 NCU08880 NCU09274
506	20.01.01	ion transport	1	0.902793	NCU07564
507	20.01.01.01	cation transport (H+, Na+, K+, Ca+ , NH+, etc)	1	0.850656	NCU07564
508	20.01.01.01.01	heavy metal ion transport (Cu+, Fe+, etc)	1	0.516223	NCU07564
509	20.01.01.01.01.01	siderophore-iron transport	1	0.116405	NCU07564
510	20.01.01.01.01.02	citrate-iron transport	0	1
511	20.01.01.01.02	organic cation transport	0	1
512	20.01.01.07	anion transport	0	1
513	20.01.01.07.01	nitrate transport	0	1
514	20.01.01.07.03	nitrite transport	0	1
515	20.01.01.07.05	sulfate/sulfite transport	0	1
516	20.01.01.07.07	phosphate transport	0	1
517	20.01.01.07.08	organic anion transport	0	1
518	20.01.01.07.09	chloride transport	0	1
519	20.01.03	C-compound and carbohydrate transport	3	0.232135	NCU01868 NCU07609 NCU08152
520	20.01.03.01	sugar transport	1	0.233026	NCU01868
521	20.01.03.03	C-dicarboxylate transport (egmalate, succinate, fumarate)	0	1
522	20.01.07	amino acid/amino acid derivatives transport	1	0.452253	NCU08880
523	20.01.09	peptide transport	0	1
524	20.01.10	protein transport	0	1
525	20.01.11	amine / polyamine transport	0	1
526	20.01.13	lipid/fatty acid transport	0	1
527	20.01.15	electron transport	1	0.933298	NCU09274
528	20.01.17	nucleotide/nucleoside/nucleobase transport	0	1
529	20.01.21	RNA transport	0	1
530	20.01.23	allantoin and allantoate transport	1	0.272697	NCU07609
531	20.01.25	vitamine/cofactor transport	2	0.051539	NCU04374 NCU07609
532	20.01.26	neurotransmitter transport	0	1
533	20.01.27	drug/toxin transport	1	0.654815	NCU00755
534	20.01.28	hormone transport	0	1
535	20.03	transport facilities	5	0.517271	NCU00290 NCU01868 NCU03107 NCU06005 NCU07609
536	20.03.01	channel / pore class transport	0	1
537	20.03.01.01	ion channels	0	1
538	20.03.01.03	gap-junction forming protein family (egconnexin, innexin)	0	1
539	20.03.01.05	nuclear pore forming protein	0	1
540	20.03.01.06	porins of mitochondria or plastids	0	1
541	20.03.01.07	general bacterial porin family (egompf, sugar porin, omf)	0	1
542	20.03.01.09	pore-forming toxins (egdiphteria toxin, hemolysin)	0	1
543	20.03.02	carrier (electrochemical potential-driven transport)	1	0.334332	NCU01868
544	20.03.02.01	uniporter	0	1
545	20.03.02.02	symporter	1	0.162072	NCU01868
546	20.03.02.02.01	proton driven symporter	1	0.10064	NCU01868
547	20.03.02.02.02	sodium driven symporter	0	1
548	20.03.02.03	antiporter	0	1
549	20.03.02.03.01	proton driven antiporter	0	1
550	20.03.02.03.02	sodium driven antiporter	0	1
551	20.03.09	phosphotransferase system	1	0.0682655	NCU06005
552	20.03.22	transport ATPases	0	1
553	20.03.25	ABC transporters	1	0.461882	NCU00290
554	20.09	transport routes	5	0.977303	NCU01868 NCU04374 NCU07564 NCU07609 NCU08152
555	20.09.01	nuclear transport	0	1
556	20.09.02	chloroplast transport	0	1
557	20.09.03	peroxisomal transport	0	1
558	20.09.04	mitochondrial transport	0	1
559	20.09.05	non-vesicular ER transport	0	1
560	20.09.07	vesicular transport (Golgi network, etc)	0	1
561	20.09.07.03	ER to Golgi transport	0	1
562	20.09.07.05	intra Golgi transport	0	1
563	20.09.07.06	post Golgi transport	0	1
564	20.09.07.07	retrograde transport	0	1
565	20.09.07.25	vesicle formation	0	1
566	20.09.07.26	vesicle docking	0	1
567	20.09.07.27	vesicle fusion	0	1
568	20.09.07.29	vesicle recycling	0	1
569	20.09.13	vacuolar/lysosomal transport	0	1
570	20.09.14	cytoskeleton-dependent transport	0	1
571	20.09.14.01	tubulin dependent transport	0	1
572	20.09.14.02	actin dependent transport	0	1
573	20.09.16	cellular export and secretion	0	1
574	20.09.16.01	Type I protein secretion system (ABC-type transport systems)	0	1
575	20.09.16.02	Type II protein secretion system (general secretory pathway, exocytosis)	0	1
576	20.09.16.03	Type III protein secretion system (virulence related secretory pathway, Gram- bacteria specific)	0	1
577	20.09.16.04	Type IV protein secretion system (conjugal DNA-protein transfer)	0	1
578	20.09.16.05	Type V protein secretion system (MttABC or TatABCDE-system)	0	1
579	20.09.16.07	non-vesicular cellular export	0	1
580	20.09.16.09	vesicular cellular export	0	1
581	20.09.16.09.03	exocytosis	0	1
582	20.09.16.09.05	synaptic vesicle exocytosis	0	1
583	20.09.18	cellular import	5	0.224159	NCU01868 NCU04374 NCU07564 NCU07609 NCU08152
584	20.09.18.07	non-vesicular cellular import	5	0.0165676	NCU01868 NCU04374 NCU07564 NCU07609 NCU08152
585	20.09.18.09	vesicular cellular import	0	1
586	20.09.18.09.01	endocytosis	0	1
587	20.09.18.09.01.01	receptor-mediated endocytosis	0	1
588	20.09.18.09.01.03	constitutive endocytosis	0	1
589	20.09.18.09.01.05	synaptic vesicle endocytosis	0	1
590	30	CELLULAR COMMUNICATION/SIGNAL TRANSDUCTION MECHANISM	3	0.828882	NCU00007 NCU06005 NCU06252
591	30.01	cellular signalling	2	0.913733	NCU06005 NCU06252
592	30.01.05	enzyme mediated signal transduction	2	0.651693	NCU06005 NCU06252
593	30.01.05.01	protein kinase	1	0.648622	NCU06252
594	30.01.05.01.01	JAK-STAT cascade	0	1
595	30.01.05.01.02	JNK cascade	0	1
596	30.01.05.01.03	MAPKKK cascade	0	1
597	30.01.05.01.04	NIK-I-kappaB/NF-kappaB cascade	0	1
598	30.01.05.01.05	tyrosine kinase	0	1
599	30.01.05.01.06	serine/threonine kinase	0	1
600	30.01.05.03	protease mediated signal transduction	0	1
601	30.01.05.05	G-protein mediated signal transduction	0	1
602	30.01.05.05.01	small GTPase mediated signal transduction	0	1
603	30.01.05.05.03	trimeric G-protein mediated signal transduction	0	1
604	30.01.05.07	two-component signal transduction system (egphosphorelay)	0	1
605	30.01.09	second messenger mediated signal transduction	0	1
606	30.01.09.01	NO mediated signal transduction	0	1
607	30.01.09.03	Ca+ mediated signal transduction	0	1
608	30.01.09.07	cAMP/cGMP mediated signal transduction	0	1
609	30.01.09.08	hormone mediated signal transduction	0	1
610	30.01.09.09	fatty acid derivatives mediated signal transduction	0	1
611	30.01.09.11	polyphosphoinositol mediated signal transduction	0	1
612	30.01.11	ligand-dependent nuclear receptors	0	1
613	30.05	transmembrane signal transduction	1	0.622726	NCU00007
614	30.05.01	receptor enzyme mediated signalling	0	1
615	30.05.01.05	interleukine receptor signalling pathway	0	1
616	30.05.01.10	two-component signal transduction system (sensor kinase component)	0	1
617	30.05.01.12	transmembrane receptor protein tyrosine kinase signalling pathways	0	1
618	30.05.01.12.01	EGF-receptor signalling pathway	0	1
619	30.05.01.12.03	FGF-receptor signalling pathway	0	1
620	30.05.01.12.04	IGF-receptor signalling pathway	0	1
621	30.05.01.12.05	insulin receptor signalling pathway	0	1
622	30.05.01.18	transmembrane receptor protein serine/threonine kinase signalling pathways	0	1
623	30.05.01.18.01	TGF-beta-receptor signalling pathway	0	1
624	30.05.02	non-enzymatic receptor mediated signalling	0	1
625	30.05.02.14	Notch-receptor signalling pathway	0	1
626	30.05.02.16	hedgehog-dependent signalling pathway	0	1
627	30.05.02.20	Wnt signalling pathway	0	1
628	30.05.02.22	Tl-receptor (LRR proteins) signalling pathway	0	1
629	30.05.02.24	G-protein coupled receptor signalling pathway	0	1
630	30.05.02.24.01	serotonin receptor signalling pathway	0	1
631	30.05.02.24.02	acetyl choline receptor signalling pathway	0	1
632	30.05.02.24.03	dopamine receptor signalling pathway	0	1
633	30.05.02.24.04	gamma-aminobutyric acid signalling pathway	0	1
634	30.05.02.24.05	glutamate signalling pathway	0	1
635	30.05.02.24.06	neuropeptide signalling pathway	0	1
636	30.05.02.26	integrin receptor signalling pathway	0	1
637	30.05.02.28	cadherin mediated signalling pathway	0	1
638	30.05.02.30	ion channel mediated signalling pathway	0	1
639	30.07	regulation of signal transduction	0	1
640	32	CELL RESCUE, DEFENSE AND VIRULENCE	9	0.614457	NCU00755 NCU02969 NCU03107 NCU03188 NCU04106 NCU04865 NCU05189 NCU05239 NCU06328
641	32.01	stress response	3	0.925109	NCU02969 NCU03188 NCU05239
642	32.01.01	oxidative stress response	1	0.587673	NCU03188
643	32.01.03	osmotic and salt stress response	1	0.572761	NCU05239
644	32.01.04	pH stress response	0	1
645	32.01.05	heat shock response	1	0.489771	NCU02969
646	32.01.06	cold shock response	0	1
647	32.01.07	unfolded protein response (egER quality control)	0	1
648	32.01.09	DNA damage response	0	1
649	32.01.11	nutrient starvation response	0	1
650	32.01.13	electromagnetic waves stress response (egUV, X-ray)	0	1
651	32.05	disease, virulence and defense	5	0.175106	NCU03188 NCU04106 NCU04865 NCU05189 NCU06328
652	32.05.01	resistance proteins	0	1
653	32.05.01.01	antibiotic resistance	0	1
654	32.05.01.03	chemical agent resistance	0	1
655	32.05.01.03.01	organic chemical agent resistance	0	1
656	32.05.01.03.03	inorganic chemical agent resistance (egheavy metals)	0	1
657	32.05.01.05	bacteriocine resistance	0	1
658	32.05.01.07	electromagnetic waves resistance (egUV)	0	1
659	32.05.03	defense related proteins	0	1
660	32.05.05	virulence, disease factors	4	0.0174836	NCU03188 NCU04865 NCU05189 NCU06328
661	32.05.05.01	toxins	0	1
662	32.05.05.02	antibiotics	0	1
663	32.05.05.03	bacteriocins	0	1
664	32.05.05.05	invasins	0	1
665	32.05.05.06	internalins	0	1
666	32.05.05.07	adhaesins	0	1
667	32.05.05.08	cytolysins	0	1
668	32.05.05.09	evasion of host immune system	0	1
669	32.05.05.13	antigenic determinants	0	1
670	32.07	detoxification	2	0.715104	NCU00755 NCU03107
671	32.07.01	detoxification involving cytochrome P	0	1
672	32.07.03	detoxification by modification	0	1
673	32.07.05	detoxification by export	1	0.471343	NCU00755
674	32.07.07	oxygen and radical detoxification	0	1
675	32.07.07.01	catalase reaction	0	1
676	32.07.07.03	glutathione conjugation reaction	0	1
677	32.07.07.05	peroxidase reaction	0	1
678	32.07.07.07	superoxide metabolism	0	1
679	32.07.09	detoxification by degradation	0	1
680	32.07.11	detoxification by impermeability	0	1
681	32.1	degradation / modification of foreign (exogenous) compounds	0	1
682	32.10.03	degradation / modification of foreign (exogenous) polynucleotides	0	1
683	32.10.05	degradation / modification of foreign (exogenous) proteins	0	1
684	32.10.07	degradation / modification of foreign (exogenous) polysaccharides	0	1
685	32.10.09	degradation / modification of foreign (exogenous) ester compounds	0	1
686	34	INTERACTION WITH THE ENVIRONMENT	10	0.18635	NCU00007 NCU02969 NCU04533 NCU05597 NCU06252 NCU07527 NCU07564 NCU08152 NCU08880 NCU11307
687	34.01	homeostasis	3	0.555421	NCU06252 NCU07564 NCU11307
688	34.01.01	homeostasis of cations	2	0.736276	NCU07564 NCU11307
689	34.01.01.01	homeostasis of metal ions (Na, K, Ca etc)	2	0.557436	NCU07564 NCU11307
690	34.01.01.03	homeostasis of protons	0	1
691	34.01.03	homeostasis of anions	1	0.233026	NCU06252
692	34.01.03.01	homeostasis of sulfate	0	1
693	34.01.03.03	homeostasis of phosphate	0	1
694	34.01.03.05	homeostasis of chloride	1	0.10064	NCU06252
695	34.01.04	glucose homeostasis	0	1
696	34.01.05	water homeostasis	0	1
697	34.01.06	immune cell homeostasis	0	1
698	34.01.07	cholesterol homeostasis	0	1
699	34.03	membrane excitability	0	1
700	34.03.01	synaptic transmission	0	1
701	34.03.03	regulation, generation and propagation of action potential	0	1
702	34.05	cell motility	0	1
703	34.05.01	cell migration	0	1
704	34.05.02	motor activity	0	1
705	34.05.07	ciliary/flagellar motility	0	1
706	34.05.09	polymerization based motility	0	1
707	34.07	cell adhesion	1	0.298004	NCU04533
708	34.07.01	cell-cell adhesion	1	0.10064	NCU04533
709	34.07.02	cell-matrix adhesion	0	1
710	34.11	cellular sensing and response to external stimulus	6	0.230359	NCU00007 NCU02969 NCU05597 NCU07527 NCU08152 NCU08880
711	34.11.01	photoperception and response	0	1
712	34.11.01.02	phototropism	0	1
713	34.11.01.03	visual transduction	0	1
714	34.11.01.05	phototaxis	0	1
715	34.11.03	chemoperception and response	3	0.587702	NCU00007 NCU05597 NCU07527
716	34.11.03.03	chemotaxis	0	1
717	34.11.03.04	chemotropism	0	1
718	34.11.03.07	pheromone response, mating-type determination, sex-specific proteins	2	0.643029	NCU05597 NCU07527
719	34.11.03.07.01	sexual incompatibility	0	1
720	34.11.03.11	pH response	1	0.116405	NCU00007
721	34.11.03.12	water response	0	1
722	34.11.03.13	osmosensing and response	0	1
723	34.11.03.15	quorum sensing system	0	1
724	34.11.05	mechanical stimulus perception and response	0	1
725	34.11.07	gravity perception and response	0	1
726	34.11.07.01	gravitropism	0	1
727	34.11.08	electromagnetic field perception and response	0	1
728	34.11.09	temperature perception and response	1	0.285462	NCU02969
729	34.11.10	response to biotic stimulus	0	1
730	34.11.11	rhythm (egcircadian, ultradian)	0	1
731	34.11.12	perception of nutrients and nutritional adaptation	2	0.0654829	NCU08152 NCU08880
732	34.11.13	gas and metabolite distribution	0	1
733	34.11.13.01	gas exchange and distribution	0	1
734	34.11.13.03	control of respiratory activity	0	1
735	34.11.13.05	metabolite distribution	0	1
736	34.11.13.07	circulation (egblood pressure)	0	1
737	36	SYSTEMIC INTERACTION WITH THE ENVIRONMENT	0	1
738	36.2	plant / fungal specific systemic sensing and response	0	1
739	36.20.16	plant defense response	0	1
740	36.20.16.01	disease resistance (R-gene) specific	0	1
741	36.20.16.03	jasmonic acid/ethylene dependent systemic resistance	0	1
742	36.20.16.05	systemic acquired resistance	0	1
743	36.20.16.07	hypersensitive response	0	1
744	36.20.18	plant hormonal regulation	0	1
745	36.20.18.01	auxin response	0	1
746	36.20.18.02	ethylen response	0	1
747	36.20.18.03	gibberellic acid response	0	1
748	36.20.18.04	cytokinin response	0	1
749	36.20.18.05	abscisic acid response	0	1
750	36.20.18.06	brassinosteroid response	0	1
751	36.20.18.99	other plant signalling molecules response (jasmonic acid, salicylic acid etc)	0	1
752	36.25	animal specific systemic sensing and response	0	1
753	36.25.01	animal sensory mechanisms	0	1
754	36.25.01.01	vision	0	1
755	36.25.01.03	hearing	0	1
756	36.25.01.05	tactile sense (peripheral physical and mechanical stimuli perception)	0	1
757	36.25.01.07	sense of balance and equilibrium (vestibular pathways and mechanisms)	0	1
758	36.25.01.09	proprioceptive pathways and mechanisms	0	1
759	36.25.01.11	taste	0	1
760	36.25.01.13	olfaction	0	1
761	36.25.01.15	pain (nociceptive pathways)	0	1
762	36.25.03	nervous system physiology	0	1
763	36.25.03.01	nervous system mediated vegetative activities / neurosecretory activities	0	1
764	36.25.03.01.01	effect on glands / hormones	0	1
765	36.25.03.01.03	effect on smooth muscles	0	1
766	36.25.03.01.05	effect on heart muscle	0	1
767	36.25.03.03	nervous system mediated motor activity	0	1
768	36.25.03.03.01	neuromuscular junction-related activities	0	1
769	36.25.03.03.03	movement and posture coordination	0	1
770	36.25.03.04	neuronal integrative functions	0	1
771	36.25.03.04.01	learning and memory	0	1
772	36.25.07	animal hormonal regulation	0	1
773	36.25.07.01	effect on kinetics (muscle contraction, pigment, gland secretion)	0	1
774	36.25.07.03	effect on homeostasis (egmetabolism or electrolyte homeostasis)	0	1
775	36.25.07.05	effect on morphogenesis	0	1
776	36.25.07.07	effect on behaviour	0	1
777	36.25.09	muscle contraction	0	1
778	36.25.09.01	smooth muscle contraction	0	1
779	36.25.09.03	striated muscle contraction	0	1
780	36.25.09.04	heart muscle contraction	0	1
781	36.25.09.05	general muscle contraction regulation	0	1
782	36.25.16	immune response	0	1
783	36.25.16.01	innate immune response (invertebrates and vertebrates)	0	1
784	36.25.16.01.01	complement response	0	1
785	36.25.16.01.03	phagocyte response (egmacrophages, dendritic cells, granulocytes)	0	1
786	36.25.16.01.05	cytotoxic cell response (egNK)	0	1
787	36.25.16.01.07	acute phase response (C-reactive protein)	0	1
788	36.25.16.03	adaptive immune response (vertebrates)	0	1
789	36.25.16.03.01	humoral response (B-cells)	0	1
790	36.25.16.03.03	adaptive cell mediated response (T-cells)	0	1
791	36.25.16.03.05	antigen presentation / processing	0	1
792	36.25.16.03.07	immunological memory	0	1
793	36.25.16.07	inflammatory response	0	1
794	36.25.16.08	response to wounding	0	1
795	36.25.16.09	blood coagulation	0	1
796	38	TRANSPOSABLE ELEMENTS, VIRAL AND PLASMID PROTEINS	0	1
797	38.01	LTR retroelements (retroviral)	0	1
798	38.02	non-LTR retroelements	0	1
799	38.03	transposons	0	1
800	38.05	viral proteins	0	1
801	38.06	phage proteins	0	1
802	38.07	proteins necessary for transposon movement	0	1
803	40	CELL FATE	0	1
804	40.01	cell growth / morphogenesis	0	1
805	40.01.01	non-directional cell growth	0	1
806	40.01.03	directional cell growth (morphogenesis)	0	1
807	40.01.03.01	regulation of directional cell growth	0	1
808	40.01.03.03	guidance of longitudinal cell extension (egpollen tube guidance, axonal pathfinding)	0	1
809	40.01.05	growth regulators / regulation of cell size	0	1
810	40.01.05.01	interpretation of external signals that control cell growth	0	1
811	40.01.05.02	interpretation of nuclear/cytoplasmic ratio to control cell growth	0	1
812	40.02.03	activity of intercellular mediators	0	1
813	40.02.03.01	cytokines (interleukines, colony stimulating factors, etc)	0	1
814	40.02.03.03	chemokines	0	1
815	40.02.03.05	growth factors	0	1
816	40.02.03.07	trophic factors	0	1
817	40.05	dedifferentiation	0	1
818	40.1	cell death	0	1
819	40.10.02	apoptosis (type I programmed cell death)	0	1
820	40.10.02.01	anti-apoptosis	0	1
821	40.10.02.02	apoptotic program	0	1
822	40.10.02.02.01	apoptotic mitochondrial changes	0	1
823	40.10.02.02.02	caspase activation	0	1
824	40.10.02.02.03	disassembly of cell structures	0	1
825	40.10.02.02.04	induction of proapoptotic gene products	0	1
826	40.10.02.02.05	repression of survival gene products	0	1
827	40.10.02.03	induction of apoptosis	0	1
828	40.10.02.03.01	induction of apoptosis by extracellular signals	0	1
829	40.10.02.03.02	induction of apoptosis by intracellular signals	0	1
830	40.10.02.04	regulation of apoptosis	0	1
831	40.10.90	other programmed cell death	0	1
832	40.2	cell aging	0	1
833	41	DEVELOPMENT (Systemic)	2	0.130749	NCU05597 NCU08726
834	41.01	fungal/microorganismic development	2	0.130749	NCU05597 NCU08726
835	41.01.01	mating (fertilization)	0	1
836	41.01.03	tissue pattern formation	1	0.0516463	NCU08726
837	41.01.03.01	fruit body development (sexually or asexually derived spores)	1	0.0175188	NCU08726
838	41.01.03.03	mycelium development (hyphae, vegetative thallus)	0	1
839	41.03	plant development	0	1
840	41.03.01	gametophyte development	0	1
841	41.03.01.01	microspore development (male gametophyte)	0	1
842	41.03.01.02	macrospore development (female gametophyte)	0	1
843	41.03.02	fertilization (pollen hydration, pollen tube guidance, double fertilization of oocyte and endosperm)	0	1
844	41.03.03	embryonal development	0	1
845	41.03.03.01	zygote development	0	1
846	41.03.03.02	early embryo development (Dicotyledone pre-heart stages)	0	1
847	41.03.03.03	mid-stage embryo development (Dicotyledone heart to torpedo)	0	1
848	41.03.03.04	late-stage embryo development (Dicotyledone torpedo and later)	0	1
849	41.03.03.05	mature embryo development	0	1
850	41.03.04	endosperm development	0	1
851	41.03.05	germination	0	1
852	41.03.06	vegetative development	0	1
853	41.03.07	flower development	0	1
854	41.03.08	fruit development and ripening	0	1
855	41.03.10	senescence	0	1
856	41.05	animal development	0	1
857	41.05.01	fertilization	0	1
858	41.05.02	embryo implantation (mammalia)	0	1
859	41.05.04	embryogenesis	0	1
860	41.05.04.01	early embryogenesis	0	1
861	41.05.04.01.01	morula development	0	1
862	41.05.04.01.03	blastocyst development	0	1
863	41.05.04.01.03.01	trophectoderm	0	1
864	41.05.04.01.03.03	inner cell mass	0	1
865	41.05.04.01.05	blastocoel development	0	1
866	41.05.04.01.07	blastulation	0	1
867	41.05.04.02	gastrulation	0	1
868	41.05.04.03	late embryogenesis	0	1
869	41.05.11	extraembryonal tissue development	0	1
870	41.05.12	odontogenesis	0	1
871	41.05.13	neurogenesis	0	1
872	41.05.13.01	synaptogenesis	0	1
873	41.05.15	myogenesis	0	1
874	41.05.16	angiogenesis	0	1
875	41.05.17	osteogenesis	0	1
876	41.05.18	hemopoiesis	0	1
877	41.05.19	asymmetries and axis determination	0	1
878	41.05.19.01	vegetal pole determination	0	1
879	41.05.19.03	animal pole determination	0	1
880	41.05.19.05	anterior-posterior axis determination	0	1
881	41.05.19.07	dorso-ventral axis determination	0	1
882	41.05.19.08	proximal-distal axis determination	0	1
883	41.05.19.09	medio-lateral axis determination	0	1
884	41.05.19.11	segment specification	0	1
885	41.05.21	extremities and appendages development	0	1
886	41.05.23	sex differentiation	0	1
887	41.05.25	gametogenesis	0	1
888	42	BIOGENESIS OF CELLULAR COMPONENTS	0	1
889	42.01	cell wall	0	1
890	42.02	eukaryotic plasma membrane	0	1
891	42.02.01	eukaryotic intracellular plasma membrane	0	1
892	42.03	cytoplasm	0	1
893	42.04	cytoskeleton/structural proteins	0	1
894	42.04.03	actin cytoskeleton	0	1
895	42.04.05	microtubule cytoskeleton	0	1
896	42.04.07	intermediate filaments	0	1
897	42.05	centrosome	0	1
898	42.06	cell junction	0	1
899	42.06.03	cell-substrate adherens junction	0	1
900	42.06.04	intercellular junction (gap junction/adherens junction)	0	1
901	42.07	endoplasmic reticulum	0	1
902	42.08	Golgi	0	1
903	42.09	intracellular transport vesicles	0	1
904	42.1	nucleus	0	1
905	42.10.03	organization of chromosome structure	0	1
906	42.10.04	centromere / kinetochore	0	1
907	42.10.05	nuclear membrane	0	1
908	42.10.06	nuclear matrix	0	1
909	42.10.07	nucleolus	0	1
910	42.10.09	nuclear speckles	0	1
911	42.16	mitochondrion	0	1
912	42.16.01	mitochondrion inheritance	0	1
913	42.19	peroxisome	0	1
914	42.22	endosome	0	1
915	42.25	vacuole or lysosome	0	1
916	42.26	plastid	0	1
917	42.26.03	chloroplast	0	1
918	42.26.05	amyloplast	0	1
919	42.26.07	chromoplast	0	1
920	42.26.09	elaioplast	0	1
921	42.26.11	etioplast	0	1
922	42.26.13	leucoplast	0	1
923	42.27	extracellular / secretion proteins	0	1
924	42.27.01	extracellular matrix	0	1
925	42.27.03	cell membrane or cell wall attached	0	1
926	42.28	periplasmatic space	0	1
927	42.29	bud / growth tip	0	1
928	42.3	prokaryotic cytoplasmic membrane	0	1
929	42.32	flagellum	0	1
930	42.33	pilus/fimbria	0	1
931	42.34	prokaryotic cell envelope structures	0	1
932	42.34.01	bacterial outer membrane (only in Gram- bacteria)	0	1
933	42.34.03	capsule and slime layer	0	1
934	42.34.05	S-Layer	0	1
935	42.34.07	peptidoglycan layer or other prokaryotic cell wall	0	1
936	42.34.09	spore or cyst coat	0	1
937	42.35	prokaryotic intracytoplasmic membrane	0	1
938	42.35.03	prokaryotic vesicular intracytoplasmic membrane	0	1
939	42.35.05	prokaryotic tubular intracytoplasmic membrane	0	1
940	42.35.07	prokaryotic thylakoid-like and thylakoid membrane	0	1
941	42.36	prokaryotic cell inclusions	0	1
942	42.37	prokaryotic nucleoid	0	1
943	43	CELL TYPE DIFFERENTIATION	4	0.660677	NCU05239 NCU07325 NCU08457 NCU08726
944	43.01	fungal/microorganismic cell type differentiation	4	0.629618	NCU05239 NCU07325 NCU08457 NCU08726
945	43.01.02	prokaryotic cell type differentiation	0	1
946	43.01.02.01	development free living cell or mycelium	0	1
947	43.01.02.02	development of sporangia and cystophore	0	1
948	43.01.02.03	development of heterocyste	0	1
949	43.01.02.05	sporulation and other development of resting stage	0	1
950	43.01.02.05.01	development of endospore	0	1
951	43.01.02.05.03	development of exospore, cyst, akinete or other resting cell	0	1
952	43.01.02.07	germination from resting stage	0	1
953	43.01.02.09	development of stalked or other sessile cell	0	1
954	43.01.02.11	development of swarmer or other mobile cell	0	1
955	43.01.03	fungal and other eukaryotic cell type differentiation	4	0.629618	NCU05239 NCU07325 NCU08457 NCU08726
956	43.01.03.01	development of free swimming or amoeboid cell	0	1
957	43.01.03.02	development of mycelial or yeast-like cell	0	1
958	43.01.03.03	development of thallic, plasmodial or sporangiophore cell	0	1
959	43.01.03.05	budding, cell polarity and filament formation	1	0.911124	NCU05239
960	43.01.03.06	hyphae formation	0	1
961	43.01.03.07	development of conidia	1	0.131896	NCU07325
962	43.01.03.09	development of asco- basidio- or zygospore	2	0.452514	NCU08457 NCU08726
963	43.01.06	protist cell differentiation	0	1
964	43.01.07	biofilm formation	0	1
965	43.02	plant cell type differentiation	0	1
966	43.02.01	stem cell/meristematic cell	0	1
967	43.02.05	epidermal cell	0	1
968	43.02.05.01	stomata/guard cell	0	1
969	43.02.05.02	plant hair cell (trichome egcotton)	0	1
970	43.02.05.03	root hair	0	1
971	43.02.07	storage cell	0	1
972	43.02.09	vascular cell	0	1
973	43.02.09.01	sieve cell (phloem)	0	1
974	43.02.09.02	companion cell (phloem)	0	1
975	43.02.09.03	vessel element (xylem)	0	1
976	43.02.11	mesenchymal / parenchymal cell	0	1
977	43.02.13	strengthening cell	0	1
978	43.02.13.01	sclerenchyma cell(dead)	0	1
979	43.02.13.02	collenchyma cell (living)	0	1
980	43.02.17	gametophytic cell	0	1
981	43.02.17.01	male gametophyte	0	1
982	43.02.17.01.01	generative pollen cell	0	1
983	43.02.17.02	female gametophyte	0	1
984	43.02.17.02.01	oocyte	0	1
985	43.02.17.02.03	central cell (n)	0	1
986	43.02.19	secretory cell	0	1
987	43.03	animal cell type differentiation	0	1
988	43.03.01	stem cell (toti- or pluripotent)	0	1
989	43.03.02	germ cell	0	1
990	43.03.03	pigment cell	0	1
991	43.03.04	epidermal cell (egkeratinocytes)	0	1
992	43.03.05	myoblast	0	1
993	43.03.07	blood cell	0	1
994	43.03.07.01	erythrocyte	0	1
995	43.03.07.02	leucocyte	0	1
996	43.03.07.02.01	lymphocyte	0	1
997	43.03.07.02.01.01	B-cell	0	1
998	43.03.07.02.01.02	T-cell	0	1
999	43.03.07.02.01.03	NK cell	0	1
1000	43.03.07.02.02	granulocyte	0	1
1001	43.03.07.02.03	monocyte (macrophage, dendritic cell)	0	1
1002	43.03.07.03	platelet	0	1
1003	43.03.11	glia cell	0	1
1004	43.03.13	neuron	0	1
1005	43.03.15	secretory cell (mastcell, endocrine cell, etc)	0	1
1006	43.03.17	structural cell of tissue (fibroblast, osteoblast, etc)	0	1
1007	43.03.18	storage cell (lipocyte, etc)	0	1
1008	43.03.19	extracellular matrix forming cell (fibrocyte, chondrocyte, osteocyte)	0	1
1009	43.03.21	extracellular matrix degrading cell (chondroclast, osteoclast)	0	1
1010	43.03.23	sensory cell	0	1
1011	45	TISSUE DIFFERENTIATION	0	1
1012	45.01	fungal/microorganismic tissue	0	1
1013	45.01.01	reproductive tissue	0	1
1014	45.01.10	thallic tissue	0	1
1015	45.01.11	plectenchymatic tissue and tissue of primitive thalli (eghigher fungi)	0	1
1016	45.02	plant tissue	0	1
1017	45.02.01	meristematic tissue	0	1
1018	45.02.01.01	shoot apical meristem	0	1
1019	45.02.01.02	root meristem	0	1
1020	45.02.05	parenchyma	0	1
1021	45.02.09	dermal tissue	0	1
1022	45.02.09.01	epidermis	0	1
1023	45.02.09.03	rhizodermis	0	1
1024	45.02.09.05	secondary dermal tissue (cork, phellem)	0	1
1025	45.02.09.07	endodermis (with casparian band)	0	1
1026	45.02.13	vascular tissue	0	1
1027	45.02.15	thallus	0	1
1028	45.03	animal tissue	0	1
1029	45.03.03	proliferative tissue (bone marrow, epidermis, etc)	0	1
1030	45.03.05	connective tissue	0	1
1031	45.03.05.01	loose connective tissue / soft tissue	0	1
1032	45.03.05.03	fibrous connective tissue (tendons, ligaments)	0	1
1033	45.03.05.05	cartilage	0	1
1034	45.03.05.07	bone	0	1
1035	45.03.05.09	whole blood and lymph	0	1
1036	45.03.05.11	adipose tissue	0	1
1037	45.03.09	epithelium	0	1
1038	45.03.10	chorion	0	1
1039	45.03.11	endothelium	0	1
1040	45.03.12	muscle	0	1
1041	45.03.12.01	striated muscle	0	1
1042	45.03.12.02	smooth muscle	0	1
1043	45.03.12.03	heart muscle	0	1
1044	45.03.15	reproductive tissue	0	1
1045	45.03.17	nervous tissue	0	1
1046	45.03.19	glandular tissue	0	1
1047	47	ORGAN DIFFERENTIATION	0	1
1048	47.01	fungal organ	0	1
1049	47.01.01	hyphe	0	1
1050	47.01.03	reproductive organ	0	1
1051	47.01.03.01	fruit body	0	1
1052	47.02	plant organ	0	1
1053	47.02.01	shoot	0	1
1054	47.02.01.01	stem	0	1
1055	47.02.01.02	leaf	0	1
1056	47.02.01.03	flower	0	1
1057	47.02.01.03.01	sepal	0	1
1058	47.02.01.03.02	petal	0	1
1059	47.02.01.03.03	anther	0	1
1060	47.02.01.03.04	carpel	0	1
1061	47.02.01.04	fruit	0	1
1062	47.02.01.05	seed	0	1
1063	47.02.01.05.01	embryo	0	1
1064	47.02.01.05.02	endosperm	0	1
1065	47.02.01.06	rhizome (potato tuber/onion)	0	1
1066	47.02.02	root	0	1
1067	47.03	animal organ	0	1
1068	47.03.01	nervous system	0	1
1069	47.03.01.01	central nervous system	0	1
1070	47.03.01.01.01	brain	0	1
1071	47.03.01.01.01.01	cerebrum	0	1
1072	47.03.01.01.01.02	cerebellum	0	1
1073	47.03.01.02	peripheral nervous system	0	1
1074	47.03.02	sensory organs	0	1
1075	47.03.02.01	ear	0	1
1076	47.03.02.02	eye	0	1
1077	47.03.02.03	nose	0	1
1078	47.03.02.04	tongue	0	1
1079	47.03.02.05	skin	0	1
1080	47.03.03	vascular organs	0	1
1081	47.03.03.02	vessels	0	1
1082	47.03.05	immune system organs	0	1
1083	47.03.05.01	thymus	0	1
1084	47.03.05.02	spleen	0	1
1085	47.03.05.03	lymphatic system	0	1
1086	47.03.07	excretory apparatus	0	1
1087	47.03.07.01	kidney	0	1
1088	47.03.07.03	malphigi	0	1
1089	47.03.07.05	pronephros (sensu Invertebrata)	0	1
1090	47.03.07.07	metanephros (sensu Invertebrata)	0	1
1091	47.03.09	respiratory system	0	1
1092	47.03.09.01	lung	0	1
1093	47.03.09.03	gill	0	1
1094	47.03.09.05	trachea (sensu Insecta)	0	1
1095	47.03.11	gastro-intestinal system	0	1
1096	47.03.11.01	tooth	0	1
1097	47.03.11.02	oesophagus	0	1
1098	47.03.11.03	stomach	0	1
1099	47.03.11.05	intestine	0	1
1100	47.03.11.07	liver	0	1
1101	47.03.11.09	pancreas	0	1
1102	47.03.11.11	gastro-intestinal system accessory organs	0	1
1103	47.03.13	dermis/cuticula	0	1
1104	47.03.13.05	hair / feather follicule	0	1
1105	47.03.15	reproductive apparatus	0	1
1106	47.03.15.01	female gonad (ovary)	0	1
1107	47.03.15.02	oviduct	0	1
1108	47.03.15.04	uterus	0	1
1109	47.03.15.04.03	cervix	0	1
1110	47.03.15.05	placenta	0	1
1111	47.03.15.07	male gonad (testis)	0	1
1112	47.03.17	skeletal system	0	1
1113	47.03.21	secretory organs (glands)	0	1
1114	47.03.21.01	mammary gland	0	1
1115	47.03.21.02	salivary gland	0	1
1116	47.03.21.03	endocrine organ	0	1
1117	47.03.21.03.01	adrenal gland	0	1
1118	47.03.21.03.02	pancreatic islet	0	1
1119	47.03.21.03.03	parathyroid	0	1
1120	47.03.21.03.04	pineal gland	0	1
1121	47.03.21.03.05	pituitary gland	0	1
1122	47.03.21.03.06	thyroid gland	0	1
1123	47.03.21.03.07	hypothalamus	0	1
1124	47.03.21.04	prostate gland	0	1
1125	47.03.21.05	sweat (perspiratory) gland	0	1
1126	70	SUBCELLULAR LOCALIZATION	0	1
1127	70.01	cell wall	0	1
1128	70.02	eukaryotic plasma membrane / membrane attached	0	1
1129	70.02.01	eukaryotic intracellular plasma membrane	0	1
1130	70.03	cytoplasm	0	1
1131	70.04	cytoskeleton	0	1
1132	70.04.03	actin cytoskeleton	0	1
1133	70.04.05	microtubule cytoskeleton	0	1
1134	70.04.07	intermediate filaments	0	1
1135	70.05	centrosome	0	1
1136	70.06	cell junction	0	1
1137	70.06.03	cell-substrate adherens junction	0	1
1138	70.06.04	intercellular junction (gap junction/adherens junction)	0	1
1139	70.07	endoplasmic reticulum	0	1
1140	70.08	Golgi	0	1
1141	70.09	intracellular transport vesicles	0	1
1142	70.1	nucleus	0	1
1143	70.10.03	chromosome	0	1
1144	70.10.04	centromere / kinetochore	0	1
1145	70.10.05	nuclear membrane	0	1
1146	70.10.06	nuclear matrix	0	1
1147	70.10.07	nucleolus	0	1
1148	70.10.09	nuclear speckles	0	1
1149	70.16	mitochondrion	0	1
1150	70.16.01	mitochondrial outer membrane	0	1
1151	70.16.03	mitochondrial intermembrane space	0	1
1152	70.16.05	mitochondrial inner membrane	0	1
1153	70.16.07	mitochondrial matrix	0	1
1154	70.19	peroxisome	0	1
1155	70.22	endosome	0	1
1156	70.25	vacuole or lysosome	0	1
1157	70.26	plastid	0	1
1158	70.26.03	chloroplast	0	1
1159	70.26.05	amyloplast	0	1
1160	70.26.07	chromoplast	0	1
1161	70.26.09	elaioplast	0	1
1162	70.26.11	etioplast	0	1
1163	70.26.13	leucoplast	0	1
1164	70.27	extracellular / secretion proteins	0	1
1165	70.27.01	extracellular matrix component	0	1
1166	70.27.03	cell membrane or cell wall attached	0	1
1167	70.28	periplasmatic space	0	1
1168	70.29	bud / growth tip	0	1
1169	70.3	prokaryotic cytoplasmic membrane	0	1
1170	70.32	flagellum	0	1
1171	70.33	pilus/fimbria	0	1
1172	70.34	prokaryotic cell envelope component	0	1
1173	70.34.01	bacterial outer membrane (only present in Gram- bacteria)	0	1
1174	70.34.03	capsule and slime layer	0	1
1175	70.34.05	S-Layer	0	1
1176	70.34.07	peptidoglycan layer or other prokaryotic cell wall	0	1
1177	70.34.09	spore or cyst coat	0	1
1178	70.35	prokaryotic intracytoplasmic membrane	0	1
1179	70.35.03	prokaryotic vesicular intracytoplasmic membrane	0	1
1180	70.35.05	prokaryotic tubular intracytoplasmic membrane	0	1
1181	70.35.07	prokaryotic thylakoid-like and thylakoid membrane	0	1
1182	70.36	prokaryotic cell inclusions	0	1
1183	70.36.03	carboxysomes	0	1
1184	70.36.05	gas vesicles	0	1
1185	70.36.07	sulfur globules or magnetosomes	0	1
1186	70.36.09	bacteriocins, rhapidosomes and protein crystals	0	1
1187	70.37	prokaryotic nucleoid	0	1
1188	73	CELL TYPE LOCALIZATION	0	1
1189	73.01	fungal / microorganismic cell type	0	1
1190	73.01.02	prokaryotic cell type	0	1
1191	73.01.02.01	free living cell or mycelium	0	1
1192	73.01.02.02	sporangial or cystophor cell	0	1
1193	73.01.02.03	heterocyste	0	1
1194	73.01.02.05	spores and other resting cell types	0	1
1195	73.01.02.05.01	endospore	0	1
1196	73.01.02.05.03	exospore, cyst, akinete or other resting cells	0	1
1197	73.01.02.11	swarmer and other mobile cells	0	1
1198	73.01.03	fungal and other eukaryotic cell types	0	1
1199	73.01.03.01	free swimming or amoeboid cell	0	1
1200	73.01.03.02	mycelial or yeast-like cell	0	1
1201	73.01.03.03	thallic, plasmodial or sporangiophore cell	0	1
1202	73.01.03.07	conidia	0	1
1203	73.01.03.09	asco- basidio- or zygospore	0	1
1204	73.02	plant cell type	0	1
1205	73.02.01	stem cell/meristematic cell	0	1
1206	73.02.05	specialized epidermal cell	0	1
1207	73.02.05.01	stomata/guard cell	0	1
1208	73.02.05.02	plant hair cell (trichome egcotton)	0	1
1209	73.02.05.03	root hair	0	1
1210	73.02.07	storage cell	0	1
1211	73.02.09	vascular cell	0	1
1212	73.02.09.01	sieve cell (phloem)	0	1
1213	73.02.09.02	companion cell (phloem)	0	1
1214	73.02.09.03	vessel element (xylem)	0	1
1215	73.02.13	strengthening cell	0	1
1216	73.02.13.01	sclerenchyma cell(dead)	0	1
1217	73.02.13.02	collenchyma cell (living)	0	1
1218	73.02.17	gametophytic cell	0	1
1219	73.02.17.01	male gametophyte	0	1
1220	73.02.17.01.01	generative pollen cell	0	1
1221	73.02.17.02	female gametophyte	0	1
1222	73.02.17.02.01	oocyte	0	1
1223	73.02.17.02.03	central cell (n)	0	1
1224	73.02.19	secretory cell	0	1
1225	73.03	animal cell type	0	1
1226	73.03.01	stem cell (toti- or pluripotent)	0	1
1227	73.03.02	germ cell	0	1
1228	73.03.03	pigment cell	0	1
1229	73.03.07	blood cell	0	1
1230	73.03.07.01	erythrocyte	0	1
1231	73.03.07.02	leucocyte	0	1
1232	73.03.07.02.01	lymphocyte	0	1
1233	73.03.07.02.01.01	B-cell	0	1
1234	73.03.07.02.01.02	T-cell	0	1
1235	73.03.07.02.01.03	NK cell	0	1
1236	73.03.07.02.02	granulocyte	0	1
1237	73.03.07.02.03	monocyte (macrophage, dendritic cell)	0	1
1238	73.03.07.03	platelet	0	1
1239	73.03.11	glia cell	0	1
1240	73.03.13	neuron	0	1
1241	73.03.15	secretory cell (mastcell, endocrine cell, etc)	0	1
1242	73.03.17	structural cell of tissue (fibroblast, osteoblast, etc)	0	1
1243	73.03.18	storage cell (lipocyte, etc)	0	1
1244	73.03.19	extracellular matrix forming cell (fibrocyte, chondrocyte, osteocyte)	0	1
1245	73.03.21	extracellular matrix degrading cell (chondroclast, osteoclast)	0	1
1246	73.03.23	sensory cell	0	1
1247	75	TISSUE LOCALIZATION	0	1
1248	75.01	fungal/microorganismic tissue	0	1
1249	75.01.01	reproductive tissue	0	1
1250	75.01.10	thallic tissue	0	1
1251	75.01.11	plectenchymatic tissue and tissue of primitive thalli (eghigher fungi)	0	1
1252	75.02	plant tissue	0	1
1253	75.02.01	meristematic tissue	0	1
1254	75.02.01.01	shoot apical meristem	0	1
1255	75.02.01.02	root meristem	0	1
1256	75.02.05	parenchyma	0	1
1257	75.02.09	dermal tissue	0	1
1258	75.02.09.01	epidermis	0	1
1259	75.02.09.03	rhizodermis	0	1
1260	75.02.09.05	secondary dermal tissue (cork, phellem)	0	1
1261	75.02.09.07	endodermis (with casparian band)	0	1
1262	75.02.13	vascular tissue	0	1
1263	75.02.15	thallus	0	1
1264	75.03	animal tissue	0	1
1265	75.03.03	proliferative tissue	0	1
1266	75.03.03.01	bone marrow	0	1
1267	75.03.04	adipose tissue	0	1
1268	75.03.05	connective tissue	0	1
1269	75.03.05.01	loose connective tissue / soft tissue	0	1
1270	75.03.05.03	fibrous connective tissue (tendons, ligaments)	0	1
1271	75.03.06	cartilage	0	1
1272	75.03.07	bone	0	1
1273	75.03.08	whole blood and lymph	0	1
1274	75.03.09	epithelium	0	1
1275	75.03.12	muscle	0	1
1276	75.03.12.01	striated muscle	0	1
1277	75.03.12.02	smooth muscle	0	1
1278	75.03.12.03	heart muscle	0	1
1279	75.03.15	reproductive tissue	0	1
1280	75.03.17	nervous tissue	0	1
1281	75.03.19	glandular tissue	0	1
1282	77	ORGAN LOCALIZATION	0	1
1283	77.01	fungal organ	0	1
1284	77.01.01	hyphe	0	1
1285	77.01.03	reproductive organ	0	1
1286	77.01.03.01	fruit body	0	1
1287	77.02	plant organ	0	1
1288	77.02.01	shoot	0	1
1289	77.02.01.01	stem	0	1
1290	77.02.01.02	leaf	0	1
1291	77.02.01.03	flower	0	1
1292	77.02.01.03.01	sepal	0	1
1293	77.02.01.03.02	petal	0	1
1294	77.02.01.03.03	anther	0	1
1295	77.02.01.03.04	carpel	0	1
1296	77.02.01.04	fruit	0	1
1297	77.02.01.05	seed	0	1
1298	77.02.01.05.01	embryo	0	1
1299	77.02.01.05.02	endosperm	0	1
1300	77.02.01.06	rhizome (potato tuber/onion)	0	1
1301	77.02.02	root	0	1
1302	77.03	animal organ	0	1
1303	77.03.01	nervous system	0	1
1304	77.03.01.01	central nervous system	0	1
1305	77.03.01.01.01	brain	0	1
1306	77.03.01.01.01.01	cerebrum	0	1
1307	77.03.01.01.01.02	cerebellum	0	1
1308	77.03.01.02	peripheral nervous system	0	1
1309	77.03.02	sensory organs	0	1
1310	77.03.02.01	ear	0	1
1311	77.03.02.02	eye	0	1
1312	77.03.02.03	nose	0	1
1313	77.03.02.04	tongue	0	1
1314	77.03.02.05	skin	0	1
1315	77.03.03	vascular organs	0	1
1316	77.03.03.02	vessels	0	1
1317	77.03.05	immune system organs	0	1
1318	77.03.05.01	thymus	0	1
1319	77.03.05.02	spleen	0	1
1320	77.03.05.03	lymphatic system	0	1
1321	77.03.07	excretory apparatus	0	1
1322	77.03.07.01	kidney	0	1
1323	77.03.07.03	malphigi	0	1
1324	77.03.07.05	pronephros (sensu Invertebrata)	0	1
1325	77.03.07.07	metanephros (sensu Invertebrata)	0	1
1326	77.03.09	respiratory system	0	1
1327	77.03.09.01	lung	0	1
1328	77.03.09.03	gill	0	1
1329	77.03.09.05	trachea (sensu Insecta)	0	1
1330	77.03.11	gastro-intestinal system	0	1
1331	77.03.11.01	teeth	0	1
1332	77.03.11.02	oesophagus	0	1
1333	77.03.11.03	stomach	0	1
1334	77.03.11.05	intestine	0	1
1335	77.03.11.07	liver	0	1
1336	77.03.11.09	pancreas	0	1
1337	77.03.11.11	gastro-intestinal system accessory organs	0	1
1338	77.03.13	dermis/cuticula	0	1
1339	77.03.13.05	hair / feather follicule	0	1
1340	77.03.15	reproductive apparatus	0	1
1341	77.03.15.01	female gonad (ovary)	0	1
1342	77.03.15.02	oviduct	0	1
1343	77.03.15.04	uterus	0	1
1344	77.03.15.04.03	cervix	0	1
1345	77.03.15.05	placenta	0	1
1346	77.03.15.07	male gonad (testis)	0	1
1347	77.03.17	skeletal system	0	1
1348	77.03.19	non organ cavities and their linings	0	1
1349	77.03.21	secretory organs (glands)	0	1
1350	77.03.21.01	mammary gland	0	1
1351	77.03.21.02	salivary gland	0	1
1352	77.03.21.03	endocrine organ	0	1
1353	77.03.21.03.01	adrenal gland	0	1
1354	77.03.21.03.02	pancreatic islet	0	1
1355	77.03.21.03.03	parathyroid	0	1
1356	77.03.21.03.04	pineal gland	0	1
1357	77.03.21.03.05	pituitary gland	0	1
1358	77.03.21.03.06	thyroid gland	0	1
1359	77.03.21.04	prostate gland	0	1
1360	77.03.21.05	sweat (perspiratory) gland	0	1
1361	98	CLASSIFICATION NOT YET CLEAR-CUT	0	1
1362	99	UNCLASSIFIED PROTEINS	108	0.42942	NCU00245 NCU00246 NCU00322 NCU00561 NCU00582 NCU00586 NCU00705 NCU00848 NCU00859 NCU00939 NCU01063 NCU01089 NCU01109 NCU01135 NCU01189 NCU01260 NCU01427 NCU01493 NCU01608 NCU01840 NCU01862 NCU01880 NCU01972 NCU02130 NCU02164 NCU02307 NCU02326 NCU02355 NCU02608 NCU02826 NCU02849 NCU02990 NCU03011 NCU03035 NCU03098 NCU03253 NCU03354 NCU03398 NCU03863 NCU04126 NCU04341 NCU04478 NCU04486 NCU04568 NCU…

## Sheet: Funcat_360 genes
Order	Funcat	Category	360	P-value	NCUs
1	1	METABOLISM	81	0.000551232	NCU00522 NCU01080 NCU01422 NCU01428 NCU01546 NCU01754 NCU01816 NCU01870 NCU01873 NCU02084 NCU02096 NCU02193 NCU02305 NCU02624 NCU02630 NCU02665 NCU02727 NCU03117 NCU03145 NCU03197 NCU03492 NCU03633 NCU03651 NCU03659 NCU04010 NCU04156 NCU04265 NCU04277 NCU04419 NCU04591 NCU04596 NCU04697 NCU04720 NCU04923 NCU04963 NCU04983 NCU05133 NCU05340 NCU05390 NCU05448 NCU05542 NCU05582 NCU05601 NCU05805 NCU…
2	1.01	amino acid metabolism	10	0.612505	NCU00522 NCU02084 NCU02727 NCU04277 NCU05805 NCU06424 NCU06924 NCU07307 NCU08898 NCU10020
3	01.01.03	assimilation of ammonia, metabolism of the glutamate group	1	0.893745	NCU07307
4	01.01.03.01	metabolism of glutamine	1	0.406586	NCU07307
5	01.01.03.01.01	biosynthesis of glutamine	0	1
6	01.01.03.01.02	degradation of glutamine	1	0.284945	NCU07307
7	01.01.03.02	metabolism of glutamate	1	0.718803	NCU07307
8	01.01.03.02.01	biosynthesis of glutamate	0	1
9	01.01.03.02.02	degradation of glutamate	1	0.428315	NCU07307
10	01.01.03.03	metabolism of proline	0	1
11	01.01.03.03.01	biosynthesis of proline	0	1
12	01.01.03.03.02	degradation of proline	0	1
13	01.01.03.04	metabolism of -hydroxyproline	0	1
14	01.01.03.04.01	biosynthesis of -hydroxyproline	0	1
15	01.01.03.04.02	degradation of -hydroxyproline	0	1
16	01.01.03.05	metabolism of arginine	0	1
17	01.01.03.05.01	biosynthesis of arginine	0	1
18	01.01.03.05.02	degradation of arginine	0	1
19	01.01.05	metabolism of urea cycle, creatine and polyamines	1	0.634734	NCU02084
20	01.01.05.01	metabolism of polyamines	1	0.406586	NCU02084
21	01.01.05.01.01	biosynthesis of polyamines	1	0.200335	NCU02084
22	01.01.05.01.02	degradation of polyamines	0	1
23	01.01.05.02	metabolism of creatine	0	1
24	01.01.05.02.01	biosynthesis of creatine	0	1
25	01.01.05.02.02	degradation of creatine	0	1
26	01.01.05.03	metabolism of urea (urea cycle)	0	1
27	01.01.06	metabolism of the aspartate family	5	0.112449	NCU00522 NCU04277 NCU05805 NCU08898 NCU10020
28	01.01.06.01	metabolism of aspartate	0	1
29	01.01.06.01.01	biosynthesis of aspartate	0	1
30	01.01.06.01.02	degradation of aspartate	0	1
31	01.01.06.02	metabolism of asparagine	0	1
32	01.01.06.02.01	biosynthesis of asparagine	0	1
33	01.01.06.02.02	degradation of asparagine	0	1
34	01.01.06.04	metabolism of threonine	1	0.336331	NCU04277
35	01.01.06.04.01	biosynthesis of threonine	1	0.169969	NCU04277
36	01.01.06.04.02	degradation of threonine	0	1
37	01.01.06.05	metabolism of methionine	3	0.087998	NCU00522 NCU04277 NCU10020
38	01.01.06.05.01	biosynthesis of methionine	2	0.164813	NCU00522 NCU10020
39	01.01.06.05.01.01	biosynthesis of homocysteine	1	0.229593	NCU00522
40	01.01.06.05.01.02	degradation of homocysteine	0	1
41	01.01.06.05.02	degradation of methionine	0	1
42	01.01.06.06	metabolism of lysine	2	0.245685	NCU05805 NCU08898
43	01.01.06.06.01	biosynthesis of lysine	1	0.428315	NCU08898
44	01.01.06.06.01.01	diaminopimelic acid pathway	0	1
45	01.01.06.06.01.03	aminoadipic acid pathway	1	0.257784	NCU08898
46	01.01.06.06.02	degradation of lysine	1	0.360625	NCU05805
47	01.01.09	metabolism of the cysteine - aromatic group	6	0.159191	NCU00522 NCU02727 NCU04277 NCU05805 NCU06424 NCU06924
48	01.01.09.01	metabolism of glycine	3	0.0105509	NCU02727 NCU05805 NCU06424
49	01.01.09.01.01	biosynthesis of glycine	2	0.0404905	NCU02727 NCU05805
50	01.01.09.01.02	degradation of glycine	3	0.00236715	NCU02727 NCU05805 NCU06424
51	01.01.09.02	metabolism of serine	2	0.126511	NCU04277 NCU05805
52	01.01.09.02.01	biosynthesis of serine	1	0.257784	NCU05805
53	01.01.09.02.02	degradation of serine	0	1
54	01.01.09.03	metabolism of cysteine	1	0.360625	NCU00522
55	01.01.09.03.01	biosynthesis of cysteine	1	0.284945	NCU00522
56	01.01.09.03.02	degradation of cysteine	0	1
57	01.01.09.04	metabolism of phenylalanine	0	1
58	01.01.09.04.01	biosynthesis of phenylalanine	0	1
59	01.01.09.04.02	degradation of phenylalanine	0	1
60	01.01.09.05	metabolism of tyrosine	0	1
61	01.01.09.05.01	biosynthesis of tyrosine	0	1
62	01.01.09.05.02	degradation of tyrosine	0	1
63	01.01.09.06	metabolism of tryptophan	1	0.620833	NCU06924
64	01.01.09.06.01	biosynthesis of tryptophan	0	1
65	01.01.09.06.02	degradation of tryptophan	0	1
66	01.01.09.07	metabolism of histidine	0	1
67	01.01.09.07.01	biosynthesis of histidine	0	1
68	01.01.09.07.02	degradation of histidine	0	1
69	01.01.11	metabolism of the pyruvate family (alanine, isoleucine, leucine, valine) and D-alanine	1	0.783564	NCU04277
70	01.01.11.01	metabolism of alanine	0	1
71	01.01.11.01.01	biosynthesis of alanine	0	1
72	01.01.11.01.02	degradation of alanine	0	1
73	01.01.11.02	metabolism of isoleucine	1	0.469423	NCU04277
74	01.01.11.02.01	biosynthesis of isoleucine	0	1
75	01.01.11.02.02	degradation of isoleucine	0	1
76	01.01.11.03	metabolism of valine	0	1
77	01.01.11.03.01	biosynthesis of valine	0	1
78	01.01.11.03.02	degradation of valine	0	1
79	01.01.11.04	metabolism of leucine	0	1
80	01.01.11.04.01	biosynthesis of leucine	0	1
81	01.01.11.04.02	degradation of leucine	0	1
82	01.01.11.06	metabolism of the D-alanine amino acid group	0	1
83	01.01.11.07	metabolism of the hydroxyamino acid group	0	1
84	01.01.13	regulation of amino acid metabolism	0	1
85	1.02	nitrogen, sulfur and selenium metabolism	11	0.00800198	NCU00522 NCU01428 NCU01816 NCU02096 NCU04697 NCU04720 NCU05340 NCU06424 NCU07309 NCU10007 NCU10051
86	01.02.02	nitrogen metabolism	4	0.0138986	NCU01816 NCU04697 NCU06424 NCU10007
87	01.02.02.01	nitrogen fixation	0	1
88	01.02.02.02	nitrate assimilation	0	1
89	01.02.02.03	nitrate dissimilation	0	1
90	01.02.02.05	ammonium nitrification	0	1
91	01.02.02.06	assimilation of ammonia	0	1
92	01.02.02.07	nitric oxide biosynthesis	0	1
93	01.02.02.09	catabolism of nitrogenous compounds	3	0.0105509	NCU01816 NCU04697 NCU10007
94	01.02.02.09.01	urea catabolism (not urea cycle)	0	1
95	01.02.02.09.03	urate catabolism	0	1
96	01.02.02.09.05	cyanate catabolism	0	1
97	01.02.02.09.06	anthranilate catabolism	0	1
98	01.02.02.09.07	formamide catabolism	0	1
99	01.02.02.09.08	nitriles catabolism	0	1
100	01.02.03	sulfur metabolism	0	1
101	01.02.03.01	sulfate assimilation	0	1
102	01.02.03.03	assimilatory reduction of sulfur	0	1
103	01.02.03.04	conjunction of sulfate	0	1
104	01.02.03.05	oxidation of sulfur to sulfate, electron as energy source	0	1
105	01.02.03.06	sulfate dissimilation, anaerobic respiration, sulfate respiration	0	1
106	01.02.05	selenium metabolism	0	1
107	01.02.07	regulation of nitrogen, sulfur and selenium metabolism	0	1
108	01.02.07.01	regulation of nitrogen metabolism	0	1
109	01.02.07.03	regulation of sulphur metabolism	0	1
110	01.02.07.05	regulation of selenium metabolism	0	1
111	1.03	nucleotide/nucleoside/nucleobase metabolism	12	0.0751686	NCU01428 NCU01816 NCU03117 NCU05542 NCU05805 NCU06532 NCU07309 NCU07547 NCU07839 NCU07853 NCU09076 NCU10007
112	01.03.01	purin nucleotide/nucleoside/nucleobase metabolism	8	0.0313518	NCU01428 NCU01816 NCU03117 NCU05542 NCU05805 NCU07309 NCU07853 NCU10007
113	01.03.01.01	purine nucleotide /nucleoside/nucleobase catabolism	4	2.48811e-05	NCU01428 NCU01816 NCU03117 NCU07853
114	01.03.01.01.01	hypoxanthine catabolism	0	1
115	01.03.01.01.03	xanthine catabolism	2	0.00390335	NCU01428 NCU03117
116	01.03.01.03	purine nucleotide/nucleoside/nucleobase anabolism	2	0.273124	NCU03117 NCU05542
117	01.03.04	pyrimidine nucleotide/nucleoside/nucleobase metabolism	2	0.505606	NCU05542 NCU06532
118	01.03.04.01	pyrimidine nucleotide/nucleoside/nucleobase catabolism	0	1
119	01.03.04.03	pyrimidine nucleotide/nucleoside/nucleobase anabolism	1	0.406586	NCU06532
120	01.03.07	deoxyribonucleotide metabolism	0	1
121	01.03.10	metabolism of cyclic and unusual nucleotides	0	1
122	01.03.13	regulation of nucleotide/nucleoside/nucleobase metabolism	0	1
123	01.03.16	polynucleotide degradation	3	0.16986	NCU07547 NCU07839 NCU09076
124	01.03.16.01	RNA degradation	3	0.0615393	NCU07547 NCU07839 NCU09076
125	01.03.16.03	DNA degradation	0	1
126	1.04	phosphate metabolism	9	0.633228	NCU02630 NCU03197 NCU03633 NCU03659 NCU04277 NCU05390 NCU09347 NCU09602 NCU09873
127	01.04.04	regulation of phosphate metabolism	1	0.449251	NCU03659
128	1.05	C-compound and carbohydrate metabolism	37	0.0128417	NCU01080 NCU01754 NCU01870 NCU01873 NCU02193 NCU02624 NCU02727 NCU03651 NCU03659 NCU04265 NCU04419 NCU04591 NCU04923 NCU04963 NCU05133 NCU05448 NCU05542 NCU05582 NCU05805 NCU06042 NCU06123 NCU06424 NCU06666 NCU06836 NCU06924 NCU07080 NCU07318 NCU07351 NCU08167 NCU08378 NCU08784 NCU08807 NCU09347 NCU09559 NCU09663 NCU09873 NCU10007
129	01.05.02	sugar, glucoside, polyol and carboxylate metabolism	7	0.280279	NCU01870 NCU03651 NCU04265 NCU04923 NCU05133 NCU06666 NCU09347
130	01.05.02.01	nucleotide-sugar metabolism	1	0.360625	NCU05133
131	01.05.02.04	sugar, glucoside, polyol and carboxylate anabolism	3	0.336443	NCU01870 NCU06666 NCU09347
132	01.05.02.07	sugar, glucoside, polyol and carboxylate catabolism	5	0.433858	NCU01870 NCU03651 NCU04265 NCU04923 NCU09347
133	01.05.03	polysaccharide metabolism	4	0.831474	NCU01873 NCU04923 NCU07351 NCU09663
134	01.05.03.01	glycogen metabolism	0	1
135	01.05.03.01.04	glycogen anabolism	0	1
136	01.05.03.01.07	glycogen catabolism	0	1
137	01.05.03.02	peptidoglycan metabolism	0	1
138	01.05.03.02.04	peptidoglycan anabolism	0	1
139	01.05.03.02.07	peptidoglycan catabolism	0	1
140	01.05.03.03	chitin metabolism	0	1
141	01.05.03.03.04	chitin anabolism	0	1
142	01.05.03.03.07	chitin catabolism	0	1
143	01.05.03.04	starch metabolism	0	1
144	01.05.03.04.04	starch anabolism	0	1
145	01.05.03.04.07	starch catabolism	0	1
146	01.05.05	C- compound metabolism	2	0.0494124	NCU02727 NCU05805
147	01.05.05.04	C- compound anabolism	1	0.169969	NCU05805
148	01.05.05.07	C- compound catabolism	2	0.0404905	NCU02727 NCU05805
149	01.05.05.07.01	serine-isocitrate lyase pathway	0	1
150	01.05.05.07.03	ribulose-monophosphate cycle	0	1
151	01.05.06	C- compound and organic acid metabolism	3	0.0395724	NCU01754 NCU02193 NCU06836
152	01.05.06.04	C- compound and organic acid anabolism	0	1
153	01.05.06.07	C- compound and organic acid catabolism	3	0.0348366	NCU01754 NCU02193 NCU06836
154	01.05.07	C- compound metabolism	0	1
155	01.05.07.04	C- compound anabolism	0	1
156	01.05.07.07	C- compound catabolism	0	1
157	01.05.08	C- compound metabolism	0	1
158	01.05.08.04	C- compound anabolism	0	1
159	01.05.08.07	C- compound catabolism	0	1
160	01.05.09	aminosaccharide metabolism	0	1
161	01.05.09.04	aminosaccharide anabolism	0	1
162	01.05.09.07	aminosaccharide catabolism	0	1
163	01.05.10	aliphatic hydrocarbon metabolism	0	1
164	01.05.10.04	aliphatic hydrocarbon anabolism	0	1
165	01.05.10.07	aliphatic hydrocarbon catabolism	0	1
166	01.05.11	aromate metabolism	1	0.775315	NCU04591
167	01.05.11.04	aromate anabolism	0	1
168	01.05.11.07	aromate catabolism	1	0.708093	NCU04591
169	01.05.11.07.01	aerobic aromate catabolism	1	0.708093	NCU04591
170	01.05.11.07.01.01	ortho-cleavage	0	1
171	01.05.11.07.01.03	meta-cleavage	0	1
172	01.05.11.07.02	anaerobic aromate catabolism	0	1
173	01.05.12	autotrophic CO-fixation	0	1
174	01.05.12.01	Calvin cycle	0	1
175	01.05.12.03	reductive TCA cycle	0	1
176	01.05.12.05	hydroxypropionate pathway	0	1
177	01.05.12.07	acetyl-CoA pathway	0	1
178	01.05.13	transfer of activated C- groups	3	0.126507	NCU02624 NCU05805 NCU06424
179	01.05.13.01	S-adenosyl-methionine - homocysteine cycle	0	1
180	01.05.13.03	tetrahydrofolate-dependent C--transfer	2	0.0589647	NCU05805 NCU06424
181	01.05.25	regulation of C-compound and carbohydrate metabolism	8	0.00930361	NCU03659 NCU04963 NCU05133 NCU05582 NCU07080 NCU08378 NCU08807 NCU09347
182	1.06	lipid, fatty acid and isoprenoid metabolism	22	0.0126744	NCU01422 NCU01754 NCU02305 NCU02624 NCU02665 NCU03492 NCU03633 NCU03651 NCU04010 NCU04156 NCU04923 NCU04983 NCU05805 NCU05985 NCU06207 NCU06402 NCU06836 NCU07081 NCU07307 NCU07308 NCU07741 NCU08280
183	01.06.02	membrane lipid metabolism	2	0.517142	NCU02305 NCU05985
184	01.06.02.01	phospholipid metabolism	2	0.394308	NCU02305 NCU05985
185	01.06.02.02	glycolipid metabolism	0	1
186	01.06.02.03	sphingolipid metabolism	0	1
187	01.06.05	fatty acid metabolism	3	0.436104	NCU06836 NCU07307 NCU07308
188	01.06.06	isoprenoid metabolism	9	0.000861658	NCU02305 NCU02624 NCU03633 NCU04156 NCU04923 NCU04983 NCU06207 NCU06402 NCU08280
189	01.06.06.01	hemiterpenes metabolism	0	1
190	01.06.06.03	monoterpenes metabolism	0	1
191	01.06.06.05	sesquiterpenes metabolism	0	1
192	01.06.06.07	diterpenes metabolism	0	1
193	01.06.06.09	triterpenes metabolism	1	0.0365655	NCU08280
194	01.06.06.11	tetracyclic and pentacyclic triterpenes (cholesterin, steroids and hopanoids) metabolism	8	0.000266391	NCU02624 NCU03633 NCU04156 NCU04923 NCU04983 NCU06207 NCU06402 NCU08280
195	01.06.06.13	tetraterpenes (carotinoids) metabolism	0	1
196	01.06.06.15	polyterpenes metabolism	0	1
197	01.06.10	regulation of lipid, fatty acid and isoprenoid metabolism	3	0.0348366	NCU01422 NCU03633 NCU05805
198	1.07	metabolism of vitamins, cofactors, and prosthetic groups	11	0.0367066	NCU01546 NCU02305 NCU02727 NCU03145 NCU04923 NCU05601 NCU05805 NCU06836 NCU06924 NCU07308 NCU08900
199	01.07.01	biosynthesis of vitamins, cofactors, and prosthetic groups	5	0.302758	NCU01546 NCU02305 NCU06836 NCU06924 NCU07308
200	01.07.03	catabolism of vitamins, cofactors, and prosthetic groups	0	1
201	01.07.04	utilization of vitamins, cofactors, and prosthetic groups	1	0.138454	NCU05601
202	01.07.07	regulation of the metabolism of vitamins, cofactors, and prosthetic groups	0	1
203	1.08	metabolism of intercellular mediators	0	1
204	01.08.01	metabolism of neurotransmitters	0	1
205	01.08.02	metabolism of hormones	0	1
206	01.08.03	metabolism of cytokines and growth factors	0	1
207	01.08.04	regulation of the metabolism of intercellular mediators	0	1
208	1.2	secondary metabolism	9	0.0927611	NCU01546 NCU01870 NCU02305 NCU04596 NCU04923 NCU05601 NCU06666 NCU06924 NCU08280
209	01.20.01	metabolism of primary metabolic sugar derivatives	1	0.384033	NCU06666
210	01.20.01.01	metabolism of secondary monosaccharides	1	0.105745	NCU06666
211	01.20.01.03	metabolism of sugar carboxylic acids	0	1
212	01.20.01.05	metabolism of sugar alcohols	0	1
213	01.20.01.07	metabolism of glycosides	0	1
214	01.20.01.09	metabolism of aminoglycoside antibiotics	0	1
215	01.20.03	metabolism of derivatives of intermediates of glucose degradation	0	1
216	01.20.05	metabolism of acetic acid derivatives	0	1
217	01.20.05.01	metabolism of acetoacetate, acetone, hydroxybutyric acid	0	1
218	01.20.05.03	metabolism of alkanes, alkenes, alkanals, alkanols	0	1
219	01.20.05.05	metabolism of fatty acid esters	0	1
220	01.20.05.07	metabolism of acetylenes	0	1
221	01.20.05.09	metabolism of eicosanoids	0	1
222	01.20.05.11	metabolism of polyketides	0	1
223	01.20.07	metabolism of propionic acid derivatives	0	1
224	01.20.09	metabolism of derivatives of intermediates of the TCA and glyoxylate pathway	0	1
225	01.20.13	metabolism of derivatives of homoisopentenyl pyrophosphate	1	0.0365655	NCU08280
226	01.20.15	metabolism of derivatives of dehydroquinic acid, shikimic acid and chorismic acid	2	0.139036	NCU01870 NCU02305
227	01.20.15.01	metabolism of naphthoquinone, anthraquinone	0	1
228	01.20.15.03	metabolism of ubiquinone	1	0.138454	NCU02305
229	01.20.17	metabolism of secondary products derived from primary amino acids	2	0.381212	NCU04923 NCU06924
230	01.20.17.01	metabolism of nonprotein amino acids	0	1
231	01.20.17.03	metabolism of amines	0	1
232	01.20.17.05	metabolism of cyanogenic glycosides	0	1
233	01.20.17.07	metabolism of glycosinolates and derivatives	0	1
234	01.20.17.09	metabolism of alkaloids	1	0.428315	NCU04923
235	01.20.19	metabolism of secondary products derived from glycine, L-serine and L-alanine	2	0.0797333	NCU01546 NCU05601
236	01.20.19.01	metabolism of porphyrins	2	0.0690899	NCU01546 NCU05601
237	01.20.19.03	metabolism of open-chain tetrapyrrols	0	1
238	01.20.19.05	metabolism of cobalamins	0	1
239	01.20.21	metabolism of sulfuric acid and L-cysteine derivatives	0	1
240	01.20.23	metabolism of secondary products derived from L-methionine	0	1
241	01.20.25	metabolism of secondary products derived from L-valin, L-leucin and L-isoleucin	0	1
242	01.20.27	metabolism of secondary products derived from L-aspartic acid and L-threonine	0	1
243	01.20.29	metabolism of secondary products derived from L-glutamic acid, L-proline and L-ornithine	0	1
244	01.20.31	metabolism of secondary products derived from L-lysine, L-arginine and L-histidine	0	1
245	01.20.33	metabolism of secondary products derived from L-tryptophan	1	0.105745	NCU06924
246	01.20.35	metabolism of secondary products derived from L-phenylalanine and L-tyrosine	0	1
247	01.20.35.01	metabolism of phenylpropanoids	0	1
248	01.20.35.01.01	metabolism of melanins	0	1
249	01.20.35.01.03	metabolism of lignins	0	1
250	01.20.35.01.05	metabolism of stilbenes, flavonoids	0	1
251	01.20.35.01.07	metabolism of coumarins	0	1
252	01.20.35.01.09	metabolism of cinnamic acids	0	1
253	01.20.35.02	metabolism of thyroids	0	1
254	01.20.35.03	metabolism of catecholamines	0	1
255	01.20.36	non-ribosomal peptide synthesis	0	1
256	01.20.37	metabolism of peptide derived compounds	1	0.428315	NCU04596
257	01.20.37.01	metabolism of thioredoxin, glutaredoxin, glutathion	1	0.384033	NCU04596
258	01.20.37.03	metabolism of peptide antibiotics	0	1
259	01.20.37.05	metabolism of beta-lactams	0	1
260	01.20.38	metabolism of toxins/drugs	0	1
261	01.20.70	regulation of secondary metabolism	0	1
262	1.25	extracellular metabolism	1	0.748638	NCU07351
263	01.25.01	extracellular polysaccharide degradation	1	0.488857	NCU07351
264	01.25.03	extracellular protein degradation	0	1
265	01.25.05	extracellular polynucleotide degradation	0	1
266	01.25.07	extracellular ester compound degradation	0	1
267	01.25.09	extracellular lignin degradation	0	1
268	01.25.11	extracellular aminosaccharide degradation	0	1
269	2	ENERGY	25	0.000661973	NCU00644 NCU01754 NCU01808 NCU01870 NCU01916 NCU02096 NCU02193 NCU02549 NCU03651 NCU03659 NCU04874 NCU04923 NCU05133 NCU05225 NCU05805 NCU06042 NCU06123 NCU06518 NCU06836 NCU07953 NCU09347 NCU09559 NCU09873 NCU10007 NCU10051
270	2.01	glycolysis and gluconeogenesis	7	0.00658106	NCU01754 NCU01870 NCU05133 NCU06836 NCU09347 NCU09873 NCU10007
271	02.01.01	glycolysis methylglyoxal bypass	0	1
272	02.01.03	regulation of glycolysis and gluconeogenesis	1	0.257784	NCU09347
273	2.04	glyoxylate cycle	0	1
274	2.05	Entner-Doudoroff pathway	0	1
275	2.07	pentose-phosphate pathway	1	0.685438	NCU06123
276	02.07.01	pentose-phosphate pathway oxidative branch	0	1
277	02.07.03	pentose-phosphate pathway non oxidative branch	0	1
278	02.07.05	regulation of pentose-phosphate pathway	0	1
279	2.08	pyruvate dehydrogenase complex	0	1
280	2.09	anaplerotic reactions	1	0.0717975	NCU03651
281	2.1	tricarboxylic-acid pathway (citrate cycle, Krebs cycle, TCA cycle)	0	1
282	2.11	electron transport and membrane-associated energy conservation	3	0.652185	NCU01808 NCU02549 NCU03651
283	02.11.05	accessory proteins of electron transport and membrane-associated energy conservation	2	0.300522	NCU01808 NCU02549
284	02.11.07	regulation of electron transport and membrane-associated energy conservation	0	1
285	2.13	respiration	13	0.000333705	NCU00644 NCU01808 NCU01916 NCU02096 NCU02193 NCU02549 NCU04874 NCU05225 NCU05805 NCU06042 NCU06518 NCU07953 NCU10051
286	02.13.01	anaerobic respiration	2	0.0181395	NCU02096 NCU10051
287	02.13.03	aerobic respiration	6	0.0502404	NCU01808 NCU02549 NCU04874 NCU05225 NCU06518 NCU07953
288	02.13.05	regulation of respiration	0	1
289	2.16	fermentation	5	0.0465917	NCU01754 NCU02193 NCU04923 NCU06123 NCU06836
290	02.16.01	alcohol fermentation	2	0.204798	NCU01754 NCU02193
291	02.16.01.01	bacterial type ethanol fermentation	0	1
292	02.16.03	lactate fermentation	1	0.257784	NCU06123
293	02.16.03.01	homofermentative pathway	0	1
294	02.16.03.03	heterofermentative pathway and fermentaton of other saccharides	1	0.0717975	NCU06123
295	02.16.03.05	bifidum pathway	0	1
296	02.16.03.07	malo-lactate fermentation	0	1
297	02.16.05	butyrate and butanol-acetoine fermentation	0	1
298	02.16.07	ethanol-acetate fermentation	0	1
299	02.16.09	mixed acid and butanediol fermentation	0	1
300	02.16.11	propionate fermentation	0	1
301	02.16.11.01	acrylate pathway	0	1
302	02.16.11.03	succinate-propionate pathway	0	1
303	02.16.13	acetate fermentation	1	0.0365655	NCU06836
304	02.16.15	methane fermentation	0	1
305	02.16.17	fermentation of nitrogenous compounds	0	1
306	02.16.17.01	single amino acid fermentations	0	1
307	02.16.17.03	stickland reactions	0	1
308	02.16.17.05	fermentation of heterocyclic compounds	0	1
309	02.16.20	regulation of fermentation	0	1
310	2.17	chemolithotrophy (egsulfide, nitrogenous compounds)	0	1
311	2.19	metabolism of energy reserves (egglycogen, trehalose)	2	0.42011	NCU03659 NCU09559
312	2.25	oxidation of fatty acids	0	1
313	2.3	photosynthesis	0	1
314	02.30.01	anoxygenic photosynthesis	0	1
315	02.30.03	oxygenic photosynthesis	0	1
316	02.30.07	accessory proteins of photosynthetic electron transport	0	1
317	02.30.10	regulation of photosynthesis	0	1
318	2.45	energy conversion and regeneration	3	0.275915	NCU00644 NCU06836 NCU10007
319	02.45.01	bioluminescence	0	1
320	02.45.03	light absorption	0	1
321	02.45.07	heat production	0	1
322	02.45.11	conversion to kinetic energy (egmovement)	0	1
323	02.45.15	energy generation (egATP synthase)	1	0.559749	NCU00644
324	02.45.20	regulation of energy conversion / regeneration	0	1
325	4	STORAGE PROTEIN	0	1
326	4.01	storage facilitating proteins	0	1
327	4.02	stored proteins	0	1
328	10	CELL CYCLE AND DNA PROCESSING	17	0.802938	NCU01369 NCU01422 NCU01504 NCU03197 NCU03659 NCU03732 NCU04635 NCU04847 NCU05309 NCU06331 NCU06943 NCU07414 NCU07839 NCU08507 NCU08985 NCU09076 NCU09602
329	10.01	DNA processing	9	0.764286	NCU01369 NCU01422 NCU03659 NCU04635 NCU06943 NCU07414 NCU07839 NCU09076 NCU09602
330	10.01.01	cellular DNA uptake	0	1
331	10.01.01.01	bacterial competence	0	1
332	10.01.01.03	conjugational DNA transfer	0	1
333	10.01.02	DNA topology	3	0.255951	NCU01369 NCU07839 NCU09076
334	10.01.03	DNA synthesis and replication	3	0.673756	NCU03659 NCU07414 NCU09602
335	10.01.03.03	ori recognition and priming complex formation	0	1
336	10.01.03.05	extension/ polymerization activity	0	1
337	10.01.05	DNA recombination and DNA repair	5	0.72173	NCU01369 NCU03659 NCU04635 NCU07839 NCU09076
338	10.01.05.01	DNA repair	4	0.727677	NCU01369 NCU03659 NCU07839 NCU09076
339	10.01.05.03	DNA recombination	3	0.226434	NCU01369 NCU07839 NCU09076
340	10.01.05.03.01	meiotic recombination	0	1
341	10.01.05.03.03	somatic / mitotic recombination	0	1
342	10.01.05.03.05	DNA integration	0	1
343	10.01.09	DNA restriction or modification	2	0.892229	NCU01422 NCU06943
344	10.01.09.01	DNA methylation	0	1
345	10.01.09.03	DNA restriction	0	1
346	10.01.09.05	DNA conformation modification (egchromatin)	2	0.885636	NCU01422 NCU06943
347	10.01.09.07	DNA imprinting and other epigenetic effects	0	1
348	10.01.11	regulation of DNA processing	0	1
349	10.03	cell cycle	11	0.768761	NCU01504 NCU03197 NCU03659 NCU03732 NCU04847 NCU05309 NCU06331 NCU07414 NCU08507 NCU08985 NCU09602
350	10.03.01	mitotic cell cycle and cell cycle control	8	0.751714	NCU03197 NCU03659 NCU03732 NCU04847 NCU05309 NCU07414 NCU08507 NCU09602
351	10.03.01.01	mitotic cell cycle	2	0.867491	NCU03659 NCU07414
352	10.03.01.01.01	G phase of mitotic cell cycle	1	0.257784	NCU07414
353	10.03.01.01.02	G/G transition, mitotic exit	0	1
354	10.03.01.01.03	G/S transition of mitotic cell cycle	1	0.648127	NCU03659
355	10.03.01.01.05	S phase of mitotic cell cycle	1	0.229593	NCU03659
356	10.03.01.01.07	G phase of mitotic cell cycle	0	1
357	10.03.01.01.09	G/M transition of mitotic cell cycle	1	0.525622	NCU03659
358	10.03.01.01.11	M phase	0	1
359	10.03.01.01.13	M/G transition of mitotic cell cycle	0	1
360	10.03.01.02	cell cycle arrest	1	0.449251	NCU07414
361	10.03.01.03	cell cycle checkpoints (checkpoints of morphogenesis, DNA-damage,-replication, mitotic phase and spindle)	0	1
362	10.03.02	meiosis	4	0.245005	NCU01504 NCU03659 NCU06331 NCU09602
363	10.03.02.01	meiosis I	0	1
364	10.03.02.03	meiosis II	0	1
365	10.03.03	cytokinesis (cell division) /septum formation and hydrolysis	0	1
366	10.03.04	nuclear and chromosomal cycle	0	1
367	10.03.04.01	centromere/kinetochore complex maturation	0	1
368	10.03.04.03	chromosome condensation	0	1
369	10.03.04.05	chromosome segregation/division	0	1
370	10.03.04.06	chromosome inactivation	0	1
371	10.03.04.07	nuclear division	0	1
372	10.03.04.09	nuclear migration	0	1
373	10.03.05	cell cycle dependent cytoskeleton reorganization	0	1
374	10.03.05.01	spindle pole body/centrosome and microtubule cycle	0	1
375	10.03.05.03	cell cycle dependent actin filament reorganization	0	1
376	11	TRANSCRIPTION	12	0.997463	NCU01369 NCU01422 NCU01640 NCU03659 NCU06943 NCU07080 NCU07547 NCU07788 NCU07839 NCU07942 NCU08807 NCU09076
377	11.02	RNA synthesis	9	0.991431	NCU01369 NCU01422 NCU01640 NCU03659 NCU07080 NCU07788 NCU07839 NCU08807 NCU09076
378	11.02.01	rRNA synthesis	0	1
379	11.02.02	tRNA synthesis	0	1
380	11.02.03	mRNA synthesis	8	0.986007	NCU01369 NCU01422 NCU01640 NCU03659 NCU07080 NCU07788 NCU07839 NCU08807
381	11.02.03.01	general transcription activities	2	0.784497	NCU01422 NCU03659
382	11.02.03.01.01	transcription initiation	1	0.428315	NCU03659
383	11.02.03.01.04	transcription elongation	0	1
384	11.02.03.01.07	transcription termination	0	1
385	11.02.03.04	transcriptional control	7	0.946352	NCU01422 NCU01640 NCU03659 NCU07080 NCU07788 NCU07839 NCU08807
386	11.02.03.04.01	transcription activation	1	0.685438	NCU01422
387	11.02.03.04.03	transcription repression	1	0.543003	NCU07080
388	11.02.03.04.05	enhancer/silencer interaction	0	1
389	11.02.03.04.07	posttranscriptional control	0	1
390	11.04	RNA processing	6	0.905902	NCU01369 NCU06943 NCU07547 NCU07839 NCU07942 NCU09076
391	11.04.01	rRNA processing	6	0.320179	NCU01369 NCU06943 NCU07547 NCU07839 NCU07942 NCU09076
392	11.04.02	tRNA processing	1	0.620833	NCU07839
393	11.04.03	mRNA processing (splicing, '-, '-end processing)	4	0.763472	NCU01369 NCU07547 NCU07839 NCU09076
394	11.04.03.01	splicing	3	0.744375	NCU01369 NCU07839 NCU09076
395	11.04.03.01.10	regulation of splicing	0	1
396	11.04.03.03	'-end processing	1	0.257784	NCU09076
397	11.04.03.05	'-end processing	0	1
398	11.04.03.11	control of mRNA stability	0	1
399	11.04.05	RNA topology	0	1
400	11.06	RNA modification	1	0.739061	NCU06943
401	11.06.01	rRNA modification	1	0.284945	NCU06943
402	11.06.02	tRNA modification	0	1
403	11.06.03	mRNA modification	0	1
404	11.06.03.01	mRNA editing	0	1
405	12	PROTEIN SYNTHESIS	15	0.217418	NCU00915 NCU01369 NCU03197 NCU03732 NCU03737 NCU04307 NCU04503 NCU06923 NCU06943 NCU07082 NCU07414 NCU07547 NCU07839 NCU08137 NCU09076
406	12.01	ribosome biogenesis	5	0.869641	NCU04503 NCU06943 NCU07547 NCU07839 NCU08137
407	12.01.01	ribosomal proteins	3	0.885501	NCU04503 NCU07839 NCU08137
408	12.04	translation	8	0.29381	NCU00915 NCU01369 NCU03197 NCU03732 NCU03737 NCU07414 NCU07839 NCU09076
409	12.04.01	translation initiation	3	0.226434	NCU01369 NCU07839 NCU09076
410	12.04.02	translation elongation	1	0.488857	NCU03737
411	12.04.03	translation termination	0	1
412	12.07	translational control	2	0.561467	NCU06923 NCU09076
413	12.1	aminoacyl-tRNA-synthetases	0	1
414	12.11	selenocystein biosynthesis and incorporation	0	1
415	14	PROTEIN FATE (folding, modification, destination)	25	0.793526	NCU01294 NCU01640 NCU01808 NCU02074 NCU02305 NCU02549 NCU02630 NCU03197 NCU03659 NCU03732 NCU04269 NCU04307 NCU05196 NCU05601 NCU06618 NCU06923 NCU06949 NCU07221 NCU07308 NCU07414 NCU07851 NCU08378 NCU08707 NCU09602 NCU10020
416	14.01	protein folding and stabilization	6	0.0502404	NCU02630 NCU03732 NCU05196 NCU07414 NCU07851 NCU09602
417	14.04	protein targeting, sorting and translocation	5	0.812217	NCU02630 NCU03732 NCU04307 NCU07414 NCU09602
418	14.07	protein modification	16	0.550233	NCU01294 NCU01808 NCU02074 NCU02549 NCU03197 NCU03659 NCU03732 NCU05601 NCU06618 NCU06923 NCU07221 NCU07308 NCU07414 NCU08378 NCU09602 NCU10020
419	14.07.01	modification with fatty acids (egmyristylation, palmitylation, farnesylation)	2	0.164813	NCU03732 NCU07414
420	14.07.02	modification with sugar residues (egglycosylation, deglycosylation)	0	1
421	14.07.02.01	O-directed glycosylation, deglycosylation	0	1
422	14.07.02.02	N-directed glycosylation, deglycosylation	0	1
423	14.07.03	modification by phosphorylation, dephosphorylation, autophosphorylation	3	0.901986	NCU03197 NCU03659 NCU07221
424	14.07.04	modification by acetylation, deacetylation	1	0.648127	NCU01808
425	14.07.05	modification by ubiquitination, deubiquitination	1	0.893745	NCU08378
426	14.07.07	modification by ubiquitin-related proteins	0	1
427	14.07.09	posttranslational modification of amino acids (eghydroxylation, methylation)	1	0.696977	NCU10020
428	14.07.11	protein processing (proteolytic)	3	0.445807	NCU02549 NCU06618 NCU06923
429	14.07.11.01	autoproteolytic processing	0	1
430	14.07.12	protein processing (non-proteolytic, egiron-incorporation)	0	1
431	14.1	assembly of protein complexes	0	1
432	14.13	protein/peptide degradation	8	0.45468	NCU01294 NCU01640 NCU02630 NCU04269 NCU05196 NCU06618 NCU06923 NCU06949
433	14.13.01	cytoplasmic and nuclear protein degradation	3	0.797514	NCU01294 NCU06618 NCU06923
434	14.13.01.01	proteasomal degradation (ubiquitin/proteasomal pathway)	0	1
435	14.13.04	lysosomal and vacuolar protein degradation	0	1
436	14.13.04.01	lysosomal protein degradation	0	1
437	14.13.04.02	vacuolar protein degradation	0	1
438	16	PROTEIN WITH BINDING FUNCTION OR COFACTOR REQUIREMENT (structural or catalytic)	50	0.252908	NCU00915 NCU01369 NCU01422 NCU01546 NCU01754 NCU01808 NCU01870 NCU02305 NCU02549 NCU02624 NCU02630 NCU03117 NCU03197 NCU03492 NCU03651 NCU03659 NCU03732 NCU03737 NCU04421 NCU04424 NCU04503 NCU04720 NCU04923 NCU04983 NCU05133 NCU05196 NCU05309 NCU05805 NCU06042 NCU06207 NCU06518 NCU06524 NCU06618 NCU06666 NCU06836 NCU06923 NCU06924 NCU06943 NCU07309 NCU07414 NCU07839 NCU08280 NCU08507 NCU08807 NCU…
439	16.01	protein binding	16	0.949519	NCU01422 NCU01870 NCU02305 NCU02630 NCU03659 NCU03732 NCU05196 NCU05309 NCU06943 NCU07414 NCU07839 NCU08507 NCU09076 NCU09347 NCU09602 NCU10270
440	16.01.01	receptor binding	0	1
441	16.02	peptide binding	0	1
442	16.03	nucleic acid binding	10	0.71793	NCU00915 NCU01369 NCU01422 NCU04424 NCU04503 NCU06943 NCU07839 NCU08507 NCU08807 NCU09076
443	16.03.01	DNA binding	6	0.457706	NCU01369 NCU01422 NCU04424 NCU07839 NCU08807 NCU09076
444	16.03.03	RNA binding	5	0.669031	NCU01369 NCU04503 NCU06943 NCU07839 NCU09076
445	16.05	polysaccharide binding	1	0.428315	NCU09663
446	16.06	motor protein binding	0	1
447	16.07	structural protein binding	0	1
448	16.09	lipid binding	1	0.488857	NCU06524
449	16.1	amine binding	0	1
450	16.11	amino acid/amino acid derivatives binding	0	1
451	16.12	sulfate binding	0	1
452	16.13	C-compound binding	1	0.507582	NCU10732
453	16.13.01	sugar binding	0	1
454	16.13.03	fatty acid binding (egacyl-carrier protein)	0	1
455	16.14	selen binding	0	1
456	16.15	drug/toxin binding	0	1
457	16.16	antigen binding	0	1
458	16.17	metal binding	19	0.000618476	NCU01546 NCU01754 NCU01808 NCU01870 NCU02549 NCU02624 NCU03117 NCU03492 NCU03732 NCU04421 NCU04720 NCU04983 NCU06207 NCU06518 NCU06618 NCU06923 NCU07309 NCU07414 NCU08507
459	16.17.01	calcium binding	1	0.559749	NCU04421
460	16.17.03	potassium binding	1	0.138454	NCU03117
461	16.17.05	sodium binding	0	1
462	16.17.07	magnesium binding	1	0.813649	NCU01870
463	16.17.09	heavy metal binding (Cu, Fe, Zn)	16	3.82987e-05	NCU01546 NCU01754 NCU01808 NCU02549 NCU02624 NCU03492 NCU03732 NCU04720 NCU04983 NCU06207 NCU06518 NCU06618 NCU06923 NCU07309 NCU07414 NCU08507
464	16.18	virus particle binding	0	1
465	16.19	nucleotide/nucleoside/nucleobase binding	11	0.792558	NCU00915 NCU01369 NCU02630 NCU03197 NCU03659 NCU03737 NCU06836 NCU07839 NCU09076 NCU09347 NCU09602
466	16.19.01	cyclic nucleotide binding (cAMP, cGMP, etc)	0	1
467	16.19.03	ATP binding	9	0.680915	NCU00915 NCU01369 NCU02630 NCU03197 NCU03659 NCU07839 NCU09076 NCU09347 NCU09602
468	16.19.05	GTP binding	1	0.937153	NCU03737
469	16.21	complex cofactor/cosubstrate/vitamine binding	13	0.0181827	NCU01808 NCU02549 NCU02624 NCU03492 NCU03651 NCU04720 NCU04923 NCU05133 NCU05805 NCU06042 NCU06666 NCU06924 NCU08280
470	16.21.01	heme binding	3	0.0190509	NCU01808 NCU02624 NCU03492
471	16.21.03	molybdopterin binding	0	1
472	16.21.05	FAD/FMN binding	4	0.0811023	NCU04720 NCU06042 NCU06924 NCU08280
473	16.21.07	NAD/NADP binding	5	0.253237	NCU03651 NCU04923 NCU05133 NCU06666 NCU06924
474	16.21.08	Fe/S binding	1	0.575884	NCU02549
475	16.21.09	cobalamine binding	0	1
476	16.21.11	thiamine pyrophosphate binding	0	1
477	16.21.13	lipoamide binding	0	1
478	16.21.15	biotin binding	0	1
479	16.21.17	pyridoxal phosphate binding	1	0.634734	NCU05805
480	16.22	hormone binding	0	1
481	16.23	neurotransmitter binding	0	1
482	16.25	oxygen binding	0	1
483	18	REGULATION OF METABOLISM AND PROTEIN FUNCTION	11	0.104581	NCU01422 NCU03197 NCU03659 NCU03732 NCU06524 NCU06923 NCU07414 NCU07839 NCU08507 NCU09602 NCU10270
484	18.01	regulation by	3	0.637251	NCU01422 NCU03197 NCU03659
485	18.01.01	regulation by modification	2	0.505606	NCU03197 NCU03659
486	18.01.03	regulation by localization	0	1
487	18.01.05	regulation by processing	0	1
488	18.01.07	regulation by binding / dissociation	1	0.839562	NCU01422
489	18.02	regulation of protein activity	11	0.093903	NCU01422 NCU03197 NCU03659 NCU03732 NCU06524 NCU06923 NCU07414 NCU07839 NCU08507 NCU09602 NCU10270
490	18.02.01	enzymatic activity regulation / enzyme regulator	8	0.202246	NCU03659 NCU03732 NCU06524 NCU06923 NCU07414 NCU08507 NCU09602 NCU10270
491	18.02.01.01	enzyme activator	3	0.426339	NCU03659 NCU03732 NCU07414
492	18.02.01.01.01	GTPase activator (GAP)	0	1
493	18.02.01.01.03	protease activator	0	1
494	18.02.01.01.05	kinase activator	0	1
495	18.02.01.02	enzyme inhibitor	2	0.164813	NCU06524 NCU06923
496	18.02.01.02.01	GTPase inhibitor (GIP)	0	1
497	18.02.01.02.03	protease inhibitor	2	0.00761799	NCU06524 NCU06923
498	18.02.01.02.05	kinase inhibitior	0	1
499	18.02.03	guanyl-nucleotide exchange factor (GEF)	0	1
500	18.02.05	regulator of G-protein signalling	0	1
501	18.02.07	regulator of receptor activity	0	1
502	18.02.09	regulator of transcription factor	2	0.191335	NCU01422 NCU07839
503	18.02.10	regulation of channel activity	0	1
504	20	CELLULAR TRANSPORT, TRANSPORT FACILITATION AND TRANSPORT ROUTES	36	0.252081	NCU00306 NCU00644 NCU01750 NCU01808 NCU01916 NCU02096 NCU02549 NCU02630 NCU03145 NCU03257 NCU03297 NCU03732 NCU03889 NCU04421 NCU04963 NCU05168 NCU05390 NCU05775 NCU05897 NCU05985 NCU06042 NCU06077 NCU06167 NCU06382 NCU06518 NCU06924 NCU07318 NCU07414 NCU07851 NCU08280 NCU08707 NCU08738 NCU09076 NCU09602 NCU10051 NCU10732
505	20.01	transported compounds (substrates)	29	0.0697815	NCU00306 NCU01808 NCU01916 NCU02096 NCU02549 NCU02630 NCU03145 NCU03257 NCU03297 NCU04963 NCU05168 NCU05390 NCU05775 NCU05897 NCU06042 NCU06077 NCU06167 NCU06382 NCU06518 NCU06924 NCU07414 NCU07851 NCU08280 NCU08707 NCU08738 NCU09076 NCU09602 NCU10051 NCU10732
506	20.01.01	ion transport	6	0.346252	NCU03145 NCU03257 NCU05390 NCU07851 NCU08707 NCU10732
507	20.01.01.01	cation transport (H+, Na+, K+, Ca+ , NH+, etc)	4	0.553625	NCU03145 NCU03257 NCU07851 NCU08707
508	20.01.01.01.01	heavy metal ion transport (Cu+, Fe+, etc)	3	0.188263	NCU03145 NCU07851 NCU08707
509	20.01.01.01.01.01	siderophore-iron transport	0	1
510	20.01.01.01.01.02	citrate-iron transport	0	1
511	20.01.01.01.02	organic cation transport	0	1
512	20.01.01.07	anion transport	2	0.273124	NCU03257 NCU05390
513	20.01.01.07.01	nitrate transport	0	1
514	20.01.01.07.03	nitrite transport	0	1
515	20.01.01.07.05	sulfate/sulfite transport	0	1
516	20.01.01.07.07	phosphate transport	1	0.257784	NCU05390
517	20.01.01.07.08	organic anion transport	0	1
518	20.01.01.07.09	chloride transport	0	1
519	20.01.03	C-compound and carbohydrate transport	4	0.460061	NCU04963 NCU05897 NCU06167 NCU10732
520	20.01.03.01	sugar transport	1	0.428315	NCU04963
521	20.01.03.03	C-dicarboxylate transport (egmalate, succinate, fumarate)	0	1
522	20.01.07	amino acid/amino acid derivatives transport	2	0.354673	NCU05168 NCU05775
523	20.01.09	peptide transport	1	0.336331	NCU08738
524	20.01.10	protein transport	3	0.777465	NCU02630 NCU07414 NCU09602
525	20.01.11	amine / polyamine transport	1	0.169969	NCU06077
526	20.01.13	lipid/fatty acid transport	2	0.493893	NCU05168 NCU06382
527	20.01.15	electron transport	9	0.104979	NCU01808 NCU02096 NCU02549 NCU03297 NCU06042 NCU06518 NCU06924 NCU08280 NCU10051
528	20.01.17	nucleotide/nucleoside/nucleobase transport	1	0.406586	NCU01916
529	20.01.21	RNA transport	1	0.66103	NCU09076
530	20.01.23	allantoin and allantoate transport	0	1
531	20.01.25	vitamine/cofactor transport	0	1
532	20.01.26	neurotransmitter transport	0	1
533	20.01.27	drug/toxin transport	2	0.650264	NCU00306 NCU06077
534	20.01.28	hormone transport	0	1
535	20.03	transport facilities	16	0.0402939	NCU00306 NCU00644 NCU01750 NCU01808 NCU01916 NCU03257 NCU04963 NCU05168 NCU05390 NCU05985 NCU06077 NCU06167 NCU06382 NCU07318 NCU09602 NCU10732
536	20.03.01	channel / pore class transport	0	1
537	20.03.01.01	ion channels	0	1
538	20.03.01.03	gap-junction forming protein family (egconnexin, innexin)	0	1
539	20.03.01.05	nuclear pore forming protein	0	1
540	20.03.01.06	porins of mitochondria or plastids	0	1
541	20.03.01.07	general bacterial porin family (egompf, sugar porin, omf)	0	1
542	20.03.01.09	pore-forming toxins (egdiphteria toxin, hemolysin)	0	1
543	20.03.02	carrier (electrochemical potential-driven transport)	2	0.204798	NCU00306 NCU05390
544	20.03.02.01	uniporter	0	1
545	20.03.02.02	symporter	1	0.311116	NCU05390
546	20.03.02.02.01	proton driven symporter	0	1
547	20.03.02.02.02	sodium driven symporter	0	1
548	20.03.02.03	antiporter	1	0.384033	NCU00306
549	20.03.02.03.01	proton driven antiporter	1	0.169969	NCU00306
550	20.03.02.03.02	sodium driven antiporter	0	1
551	20.03.09	phosphotransferase system	1	0.138454	NCU07318
552	20.03.22	transport ATPases	1	0.87185	NCU00644
553	20.03.25	ABC transporters	2	0.367996	NCU01750 NCU06382
554	20.09	transport routes	17	0.85826	NCU01916 NCU02630 NCU03145 NCU03257 NCU03732 NCU03889 NCU04421 NCU04963 NCU05168 NCU05390 NCU05775 NCU06077 NCU06167 NCU07414 NCU08738 NCU09602 NCU10732
555	20.09.01	nuclear transport	1	0.876562	NCU09602
556	20.09.02	chloroplast transport	0	1
557	20.09.03	peroxisomal transport	0	1
558	20.09.04	mitochondrial transport	9	0.00294074	NCU01916 NCU02630 NCU03145 NCU03732 NCU05168 NCU05390 NCU07414 NCU09602 NCU10732
559	20.09.05	non-vesicular ER transport	1	0.257784	NCU09602
560	20.09.07	vesicular transport (Golgi network, etc)	4	0.845689	NCU03732 NCU03889 NCU07414 NCU09602
561	20.09.07.03	ER to Golgi transport	0	1
562	20.09.07.05	intra Golgi transport	1	0.525622	NCU03889
563	20.09.07.06	post Golgi transport	0	1
564	20.09.07.07	retrograde transport	0	1
565	20.09.07.25	vesicle formation	0	1
566	20.09.07.26	vesicle docking	0	1
567	20.09.07.27	vesicle fusion	1	0.406586	NCU03889
568	20.09.07.29	vesicle recycling	0	1
569	20.09.13	vacuolar/lysosomal transport	2	0.888977	NCU05390 NCU05775
570	20.09.14	cytoskeleton-dependent transport	0	1
571	20.09.14.01	tubulin dependent transport	0	1
572	20.09.14.02	actin dependent transport	0	1
573	20.09.16	cellular export and secretion	3	0.811543	NCU04421 NCU04963 NCU06077
574	20.09.16.01	Type I protein secretion system (ABC-type transport systems)	0	1
575	20.09.16.02	Type II protein secretion system (general secretory pathway, exocytosis)	0	1
576	20.09.16.03	Type III protein secretion system (virulence related secretory pathway, Gram- bacteria specific)	0	1
577	20.09.16.04	Type IV protein secretion system (conjugal DNA-protein transfer)	0	1
578	20.09.16.05	Type V protein secretion system (MttABC or TatABCDE-system)	0	1
579	20.09.16.07	non-vesicular cellular export	0	1
580	20.09.16.09	vesicular cellular export	0	1
581	20.09.16.09.03	exocytosis	0	1
582	20.09.16.09.05	synaptic vesicle exocytosis	0	1
583	20.09.18	cellular import	7	0.517935	NCU03145 NCU03257 NCU04421 NCU04963 NCU05168 NCU06167 NCU08738
584	20.09.18.07	non-vesicular cellular import	5	0.199566	NCU03257 NCU04963 NCU05168 NCU06167 NCU08738
585	20.09.18.09	vesicular cellular import	1	0.926974	NCU04421
586	20.09.18.09.01	endocytosis	1	0.926974	NCU04421
587	20.09.18.09.01.01	receptor-mediated endocytosis	0	1
588	20.09.18.09.01.03	constitutive endocytosis	0	1
589	20.09.18.09.01.05	synaptic vesicle endocytosis	0	1
590	30	CELLULAR COMMUNICATION/SIGNAL TRANSDUCTION MECHANISM	4	0.985443	NCU03197 NCU03659 NCU07221 NCU08985
591	30.01	cellular signalling	4	0.970703	NCU03197 NCU03659 NCU07221 NCU08985
592	30.01.05	enzyme mediated signal transduction	1	0.991123	NCU03197
593	30.01.05.01	protein kinase	1	0.889687	NCU03197
594	30.01.05.01.01	JAK-STAT cascade	0	1
595	30.01.05.01.02	JNK cascade	0	1
596	30.01.05.01.03	MAPKKK cascade	0	1
597	30.01.05.01.04	NIK-I-kappaB/NF-kappaB cascade	0	1
598	30.01.05.01.05	tyrosine kinase	0	1
599	30.01.05.01.06	serine/threonine kinase	1	0.449251	NCU03197
600	30.01.05.03	protease mediated signal transduction	0	1
601	30.01.05.05	G-protein mediated signal transduction	0	1
602	30.01.05.05.01	small GTPase mediated signal transduction	0	1
603	30.01.05.05.03	trimeric G-protein mediated signal transduction	0	1
604	30.01.05.07	two-component signal transduction system (egphosphorelay)	0	1
605	30.01.09	second messenger mediated signal transduction	0	1
606	30.01.09.01	NO mediated signal transduction	0	1
607	30.01.09.03	Ca+ mediated signal transduction	0	1
608	30.01.09.07	cAMP/cGMP mediated signal transduction	0	1
609	30.01.09.08	hormone mediated signal transduction	0	1
610	30.01.09.09	fatty acid derivatives mediated signal transduction	0	1
611	30.01.09.11	polyphosphoinositol mediated signal transduction	0	1
612	30.01.11	ligand-dependent nuclear receptors	0	1
613	30.05	transmembrane signal transduction	0	1
614	30.05.01	receptor enzyme mediated signalling	0	1
615	30.05.01.05	interleukine receptor signalling pathway	0	1
616	30.05.01.10	two-component signal transduction system (sensor kinase component)	0	1
617	30.05.01.12	transmembrane receptor protein tyrosine kinase signalling pathways	0	1
618	30.05.01.12.01	EGF-receptor signalling pathway	0	1
619	30.05.01.12.03	FGF-receptor signalling pathway	0	1
620	30.05.01.12.04	IGF-receptor signalling pathway	0	1
621	30.05.01.12.05	insulin receptor signalling pathway	0	1
622	30.05.01.18	transmembrane receptor protein serine/threonine kinase signalling pathways	0	1
623	30.05.01.18.01	TGF-beta-receptor signalling pathway	0	1
624	30.05.02	non-enzymatic receptor mediated signalling	0	1
625	30.05.02.14	Notch-receptor signalling pathway	0	1
626	30.05.02.16	hedgehog-dependent signalling pathway	0	1
627	30.05.02.20	Wnt signalling pathway	0	1
628	30.05.02.22	Tl-receptor (LRR proteins) signalling pathway	0	1
629	30.05.02.24	G-protein coupled receptor signalling pathway	0	1
630	30.05.02.24.01	serotonin receptor signalling pathway	0	1
631	30.05.02.24.02	acetyl choline receptor signalling pathway	0	1
632	30.05.02.24.03	dopamine receptor signalling pathway	0	1
633	30.05.02.24.04	gamma-aminobutyric acid signalling pathway	0	1
634	30.05.02.24.05	glutamate signalling pathway	0	1
635	30.05.02.24.06	neuropeptide signalling pathway	0	1
636	30.05.02.26	integrin receptor signalling pathway	0	1
637	30.05.02.28	cadherin mediated signalling pathway	0	1
638	30.05.02.30	ion channel mediated signalling pathway	0	1
639	30.07	regulation of signal transduction	0	1
640	32	CELL RESCUE, DEFENSE AND VIRULENCE	24	0.190617	NCU00306 NCU01754 NCU01808 NCU02096 NCU02624 NCU02630 NCU03145 NCU03297 NCU03732 NCU03887 NCU04473 NCU04697 NCU04923 NCU05196 NCU06042 NCU06077 NCU06518 NCU07414 NCU07787 NCU07851 NCU09559 NCU09602 NCU10051 NCU10270
641	32.01	stress response	15	0.200965	NCU01808 NCU02096 NCU02630 NCU03297 NCU03732 NCU03887 NCU04923 NCU05196 NCU06042 NCU06518 NCU07414 NCU09559 NCU09602 NCU10051 NCU10270
642	32.01.01	oxidative stress response	2	0.550662	NCU03297 NCU06518
643	32.01.03	osmotic and salt stress response	1	0.833442	NCU04923
644	32.01.04	pH stress response	0	1
645	32.01.05	heat shock response	5	0.0118297	NCU02630 NCU03732 NCU04923 NCU07414 NCU09602
646	32.01.06	cold shock response	0	1
647	32.01.07	unfolded protein response (egER quality control)	4	0.103246	NCU02630 NCU03732 NCU05196 NCU09602
648	32.01.09	DNA damage response	0	1
649	32.01.11	nutrient starvation response	0	1
650	32.01.13	electromagnetic waves stress response (egUV, X-ray)	0	1
651	32.05	disease, virulence and defense	8	0.277817	NCU00306 NCU02096 NCU03887 NCU04473 NCU04697 NCU06077 NCU07787 NCU10051
652	32.05.01	resistance proteins	5	0.0977604	NCU00306 NCU02096 NCU03887 NCU06077 NCU10051
653	32.05.01.01	antibiotic resistance	0	1
654	32.05.01.03	chemical agent resistance	3	0.0499634	NCU02096 NCU03887 NCU10051
655	32.05.01.03.01	organic chemical agent resistance	0	1
656	32.05.01.03.03	inorganic chemical agent resistance (egheavy metals)	0	1
657	32.05.01.05	bacteriocine resistance	0	1
658	32.05.01.07	electromagnetic waves resistance (egUV)	0	1
659	32.05.03	defense related proteins	0	1
660	32.05.05	virulence, disease factors	3	0.346545	NCU04473 NCU04697 NCU06077
661	32.05.05.01	toxins	1	0.384033	NCU06077
662	32.05.05.02	antibiotics	0	1
663	32.05.05.03	bacteriocins	0	1
664	32.05.05.05	invasins	0	1
665	32.05.05.06	internalins	0	1
666	32.05.05.07	adhaesins	0	1
667	32.05.05.08	cytolysins	0	1
668	32.05.05.09	evasion of host immune system	0	1
669	32.05.05.13	antigenic determinants	0	1
670	32.07	detoxification	9	0.0760864	NCU00306 NCU01754 NCU02624 NCU03145 NCU03297 NCU03887 NCU04697 NCU06077 NCU07851
671	32.07.01	detoxification involving cytochrome P	1	0.428315	NCU02624
672	32.07.03	detoxification by modification	1	0.559749	NCU03297
673	32.07.05	detoxification by export	2	0.381212	NCU00306 NCU06077
674	32.07.07	oxygen and radical detoxification	1	0.634734	NCU03297
675	32.07.07.01	catalase reaction	0	1
676	32.07.07.03	glutathione conjugation reaction	0	1
677	32.07.07.05	peroxidase reaction	1	0.169969	NCU03297
678	32.07.07.07	superoxide metabolism	0	1
679	32.07.09	detoxification by degradation	1	0.406586	NCU04697
680	32.07.11	detoxification by impermeability	0	1
681	32.1	degradation / modification of foreign (exogenous) compounds	0	1
682	32.10.03	degradation / modification of foreign (exogenous) polynucleotides	0	1
683	32.10.05	degradation / modification of foreign (exogenous) proteins	0	1
684	32.10.07	degradation / modification of foreign (exogenous) polysaccharides	0	1
685	32.10.09	degradation / modification of foreign (exogenous) ester compounds	0	1
686	34	INTERACTION WITH THE ENVIRONMENT	16	0.43873	NCU00644 NCU03145 NCU03257 NCU03659 NCU04421 NCU04503 NCU04923 NCU04963 NCU05168 NCU05390 NCU05435 NCU06077 NCU07851 NCU08707 NCU09559 NCU09602
687	34.01	homeostasis	8	0.256887	NCU00644 NCU03145 NCU03257 NCU04421 NCU05390 NCU07851 NCU08707 NCU09602
688	34.01.01	homeostasis of cations	7	0.29765	NCU00644 NCU03145 NCU03257 NCU04421 NCU07851 NCU08707 NCU09602
689	34.01.01.01	homeostasis of metal ions (Na, K, Ca etc)	5	0.346289	NCU03145 NCU04421 NCU07851 NCU08707 NCU09602
690	34.01.01.03	homeostasis of protons	1	0.748638	NCU00644
691	34.01.03	homeostasis of anions	1	0.428315	NCU05390
692	34.01.03.01	homeostasis of sulfate	0	1
693	34.01.03.03	homeostasis of phosphate	1	0.138454	NCU05390
694	34.01.03.05	homeostasis of chloride	0	1
695	34.01.04	glucose homeostasis	0	1
696	34.01.05	water homeostasis	0	1
697	34.01.06	immune cell homeostasis	0	1
698	34.01.07	cholesterol homeostasis	0	1
699	34.03	membrane excitability	0	1
700	34.03.01	synaptic transmission	0	1
701	34.03.03	regulation, generation and propagation of action potential	0	1
702	34.05	cell motility	0	1
703	34.05.01	cell migration	0	1
704	34.05.02	motor activity	0	1
705	34.05.07	ciliary/flagellar motility	0	1
706	34.05.09	polymerization based motility	0	1
707	34.07	cell adhesion	0	1
708	34.07.01	cell-cell adhesion	0	1
709	34.07.02	cell-matrix adhesion	0	1
710	34.11	cellular sensing and response to external stimulus	9	0.492078	NCU03659 NCU04503 NCU04923 NCU04963 NCU05168 NCU05435 NCU06077 NCU09559 NCU09602
711	34.11.01	photoperception and response	0	1
712	34.11.01.02	phototropism	0	1
713	34.11.01.03	visual transduction	0	1
714	34.11.01.05	phototaxis	0	1
715	34.11.03	chemoperception and response	5	0.76381	NCU04503 NCU04923 NCU05168 NCU05435 NCU06077
716	34.11.03.03	chemotaxis	0	1
717	34.11.03.04	chemotropism	0	1
718	34.11.03.07	pheromone response, mating-type determination, sex-specific proteins	2	0.944782	NCU04503 NCU05435
719	34.11.03.07.01	sexual incompatibility	0	1
720	34.11.03.11	pH response	0	1
721	34.11.03.12	water response	0	1
722	34.11.03.13	osmosensing and response	2	0.341251	NCU04923 NCU05168
723	34.11.03.15	quorum sensing system	0	1
724	34.11.05	mechanical stimulus perception and response	0	1
725	34.11.07	gravity perception and response	0	1
726	34.11.07.01	gravitropism	0	1
727	34.11.08	electromagnetic field perception and response	0	1
728	34.11.09	temperature perception and response	1	0.507582	NCU09602
729	34.11.10	response to biotic stimulus	0	1
730	34.11.11	rhythm (egcircadian, ultradian)	1	0.311116	NCU09559
731	34.11.12	perception of nutrients and nutritional adaptation	1	0.591428	NCU04963
732	34.11.13	gas and metabolite distribution	0	1
733	34.11.13.01	gas exchange and distribution	0	1
734	34.11.13.03	control of respiratory activity	0	1
735	34.11.13.05	metabolite distribution	0	1
736	34.11.13.07	circulation (egblood pressure)	0	1
737	36	SYSTEMIC INTERACTION WITH THE ENVIRONMENT	0	1
738	36.2	plant / fungal specific systemic sensing and response	0	1
739	36.20.16	plant defense response	0	1
740	36.20.16.01	disease resistance (R-gene) specific	0	1
741	36.20.16.03	jasmonic acid/ethylene dependent systemic resistance	0	1
742	36.20.16.05	systemic acquired resistance	0	1
743	36.20.16.07	hypersensitive response	0	1
744	36.20.18	plant hormonal regulation	0	1
745	36.20.18.01	auxin response	0	1
746	36.20.18.02	ethylen response	0	1
747	36.20.18.03	gibberellic acid response	0	1
748	36.20.18.04	cytokinin response	0	1
749	36.20.18.05	abscisic acid response	0	1
750	36.20.18.06	brassinosteroid response	0	1
751	36.20.18.99	other plant signalling molecules response (jasmonic acid, salicylic acid etc)	0	1
752	36.25	animal specific systemic sensing and response	0	1
753	36.25.01	animal sensory mechanisms	0	1
754	36.25.01.01	vision	0	1
755	36.25.01.03	hearing	0	1
756	36.25.01.05	tactile sense (peripheral physical and mechanical stimuli perception)	0	1
757	36.25.01.07	sense of balance and equilibrium (vestibular pathways and mechanisms)	0	1
758	36.25.01.09	proprioceptive pathways and mechanisms	0	1
759	36.25.01.11	taste	0	1
760	36.25.01.13	olfaction	0	1
761	36.25.01.15	pain (nociceptive pathways)	0	1
762	36.25.03	nervous system physiology	0	1
763	36.25.03.01	nervous system mediated vegetative activities / neurosecretory activities	0	1
764	36.25.03.01.01	effect on glands / hormones	0	1
765	36.25.03.01.03	effect on smooth muscles	0	1
766	36.25.03.01.05	effect on heart muscle	0	1
767	36.25.03.03	nervous system mediated motor activity	0	1
768	36.25.03.03.01	neuromuscular junction-related activities	0	1
769	36.25.03.03.03	movement and posture coordination	0	1
770	36.25.03.04	neuronal integrative functions	0	1
771	36.25.03.04.01	learning and memory	0	1
772	36.25.07	animal hormonal regulation	0	1
773	36.25.07.01	effect on kinetics (muscle contraction, pigment, gland secretion)	0	1
774	36.25.07.03	effect on homeostasis (egmetabolism or electrolyte homeostasis)	0	1
775	36.25.07.05	effect on morphogenesis	0	1
776	36.25.07.07	effect on behaviour	0	1
777	36.25.09	muscle contraction	0	1
778	36.25.09.01	smooth muscle contraction	0	1
779	36.25.09.03	striated muscle contraction	0	1
780	36.25.09.04	heart muscle contraction	0	1
781	36.25.09.05	general muscle contraction regulation	0	1
782	36.25.16	immune response	0	1
783	36.25.16.01	innate immune response (invertebrates and vertebrates)	0	1
784	36.25.16.01.01	complement response	0	1
785	36.25.16.01.03	phagocyte response (egmacrophages, dendritic cells, granulocytes)	0	1
786	36.25.16.01.05	cytotoxic cell response (egNK)	0	1
787	36.25.16.01.07	acute phase response (C-reactive protein)	0	1
788	36.25.16.03	adaptive immune response (vertebrates)	0	1
789	36.25.16.03.01	humoral response (B-cells)	0	1
790	36.25.16.03.03	adaptive cell mediated response (T-cells)	0	1
791	36.25.16.03.05	antigen presentation / processing	0	1
792	36.25.16.03.07	immunological memory	0	1
793	36.25.16.07	inflammatory response	0	1
794	36.25.16.08	response to wounding	0	1
795	36.25.16.09	blood coagulation	0	1
796	38	TRANSPOSABLE ELEMENTS, VIRAL AND PLASMID PROTEINS	0	1
797	38.01	LTR retroelements (retroviral)	0	1
798	38.02	non-LTR retroelements	0	1
799	38.03	transposons	0	1
800	38.05	viral proteins	0	1
801	38.06	phage proteins	0	1
802	38.07	proteins necessary for transposon movement	0	1
803	40	CELL FATE	5	0.907534	NCU03117 NCU03659 NCU06815 NCU08907 NCU09602
804	40.01	cell growth / morphogenesis	4	0.865113	NCU03117 NCU03659 NCU06815 NCU08907
805	40.01.01	non-directional cell growth	1	0.0365655	NCU03117
806	40.01.03	directional cell growth (morphogenesis)	1	0.839562	NCU06815
807	40.01.03.01	regulation of directional cell growth	0	1
808	40.01.03.03	guidance of longitudinal cell extension (egpollen tube guidance, axonal pathfinding)	0	1
809	40.01.05	growth regulators / regulation of cell size	0	1
810	40.01.05.01	interpretation of external signals that control cell growth	0	1
811	40.01.05.02	interpretation of nuclear/cytoplasmic ratio to control cell growth	0	1
812	40.02.03	activity of intercellular mediators	0	1
813	40.02.03.01	cytokines (interleukines, colony stimulating factors, etc)	0	1
814	40.02.03.03	chemokines	0	1
815	40.02.03.05	growth factors	0	1
816	40.02.03.07	trophic factors	0	1
817	40.05	dedifferentiation	0	1
818	40.1	cell death	1	0.833442	NCU09602
819	40.10.02	apoptosis (type I programmed cell death)	1	0.833442	NCU09602
820	40.10.02.01	anti-apoptosis	1	0.360625	NCU09602
821	40.10.02.02	apoptotic program	0	1
822	40.10.02.02.01	apoptotic mitochondrial changes	0	1
823	40.10.02.02.02	caspase activation	0	1
824	40.10.02.02.03	disassembly of cell structures	0	1
825	40.10.02.02.04	induction of proapoptotic gene products	0	1
826	40.10.02.02.05	repression of survival gene products	0	1
827	40.10.02.03	induction of apoptosis	0	1
828	40.10.02.03.01	induction of apoptosis by extracellular signals	0	1
829	40.10.02.03.02	induction of apoptosis by intracellular signals	0	1
830	40.10.02.04	regulation of apoptosis	0	1
831	40.10.90	other programmed cell death	0	1
832	40.2	cell aging	0	1
833	41	DEVELOPMENT (Systemic)	2	0.381212	NCU04503 NCU09602
834	41.01	fungal/microorganismic development	2	0.381212	NCU04503 NCU09602
835	41.01.01	mating (fertilization)	2	0.151816	NCU04503 NCU09602
836	41.01.03	tissue pattern formation	0	1
837	41.01.03.01	fruit body development (sexually or asexually derived spores)	0	1
838	41.01.03.03	mycelium development (hyphae, vegetative thallus)	0	1
839	41.03	plant development	0	1
840	41.03.01	gametophyte development	0	1
841	41.03.01.01	microspore development (male gametophyte)	0	1
842	41.03.01.02	macrospore development (female gametophyte)	0	1
843	41.03.02	fertilization (pollen hydration, pollen tube guidance, double fertilization of oocyte and endosperm)	0	1
844	41.03.03	embryonal development	0	1
845	41.03.03.01	zygote development	0	1
846	41.03.03.02	early embryo development (Dicotyledone pre-heart stages)	0	1
847	41.03.03.03	mid-stage embryo development (Dicotyledone heart to torpedo)	0	1
848	41.03.03.04	late-stage embryo development (Dicotyledone torpedo and later)	0	1
849	41.03.03.05	mature embryo development	0	1
850	41.03.04	endosperm development	0	1
851	41.03.05	germination	0	1
852	41.03.06	vegetative development	0	1
853	41.03.07	flower development	0	1
854	41.03.08	fruit development and ripening	0	1
855	41.03.10	senescence	0	1
856	41.05	animal development	0	1
857	41.05.01	fertilization	0	1
858	41.05.02	embryo implantation (mammalia)	0	1
859	41.05.04	embryogenesis	0	1
860	41.05.04.01	early embryogenesis	0	1
861	41.05.04.01.01	morula development	0	1
862	41.05.04.01.03	blastocyst development	0	1
863	41.05.04.01.03.01	trophectoderm	0	1
864	41.05.04.01.03.03	inner cell mass	0	1
865	41.05.04.01.05	blastocoel development	0	1
866	41.05.04.01.07	blastulation	0	1
867	41.05.04.02	gastrulation	0	1
868	41.05.04.03	late embryogenesis	0	1
869	41.05.11	extraembryonal tissue development	0	1
870	41.05.12	odontogenesis	0	1
871	41.05.13	neurogenesis	0	1
872	41.05.13.01	synaptogenesis	0	1
873	41.05.15	myogenesis	0	1
874	41.05.16	angiogenesis	0	1
875	41.05.17	osteogenesis	0	1
876	41.05.18	hemopoiesis	0	1
877	41.05.19	asymmetries and axis determination	0	1
878	41.05.19.01	vegetal pole determination	0	1
879	41.05.19.03	animal pole determination	0	1
880	41.05.19.05	anterior-posterior axis determination	0	1
881	41.05.19.07	dorso-ventral axis determination	0	1
882	41.05.19.08	proximal-distal axis determination	0	1
883	41.05.19.09	medio-lateral axis determination	0	1
884	41.05.19.11	segment specification	0	1
885	41.05.21	extremities and appendages development	0	1
886	41.05.23	sex differentiation	0	1
887	41.05.25	gametogenesis	0	1
888	42	BIOGENESIS OF CELLULAR COMPONENTS	6	0.999685	NCU01298 NCU01422 NCU03297 NCU06836 NCU06943 NCU09602
889	42.01	cell wall	3	0.904516	NCU01298 NCU06836 NCU09602
890	42.02	eukaryotic plasma membrane	0	1
891	42.02.01	eukaryotic intracellular plasma membrane	0	1
892	42.03	cytoplasm	0	1
893	42.04	cytoskeleton/structural proteins	0	1
894	42.04.03	actin cytoskeleton	0	1
895	42.04.05	microtubule cytoskeleton	0	1
896	42.04.07	intermediate filaments	0	1
897	42.05	centrosome	0	1
898	42.06	cell junction	0	1
899	42.06.03	cell-substrate adherens junction	0	1
900	42.06.04	intercellular junction (gap junction/adherens junction)	0	1
901	42.07	endoplasmic reticulum	0	1
902	42.08	Golgi	0	1
903	42.09	intracellular transport vesicles	0	1
904	42.1	nucleus	2	0.823091	NCU01422 NCU06943
905	42.10.03	organization of chromosome structure	2	0.772188	NCU01422 NCU06943
906	42.10.04	centromere / kinetochore	0	1
907	42.10.05	nuclear membrane	0	1
908	42.10.06	nuclear matrix	0	1
909	42.10.07	nucleolus	1	0.138454	NCU06943
910	42.10.09	nuclear speckles	0	1
911	42.16	mitochondrion	1	0.939468	NCU03297
912	42.16.01	mitochondrion inheritance	0	1
913	42.19	peroxisome	0	1
914	42.22	endosome	0	1
915	42.25	vacuole or lysosome	0	1
916	42.26	plastid	0	1
917	42.26.03	chloroplast	0	1
918	42.26.05	amyloplast	0	1
919	42.26.07	chromoplast	0	1
920	42.26.09	elaioplast	0	1
921	42.26.11	etioplast	0	1
922	42.26.13	leucoplast	0	1
923	42.27	extracellular / secretion proteins	0	1
924	42.27.01	extracellular matrix	0	1
925	42.27.03	cell membrane or cell wall attached	0	1
926	42.28	periplasmatic space	0	1
927	42.29	bud / growth tip	0	1
928	42.3	prokaryotic cytoplasmic membrane	0	1
929	42.32	flagellum	0	1
930	42.33	pilus/fimbria	0	1
931	42.34	prokaryotic cell envelope structures	0	1
932	42.34.01	bacterial outer membrane (only in Gram- bacteria)	0	1
933	42.34.03	capsule and slime layer	0	1
934	42.34.05	S-Layer	0	1
935	42.34.07	peptidoglycan layer or other prokaryotic cell wall	0	1
936	42.34.09	spore or cyst coat	0	1
937	42.35	prokaryotic intracytoplasmic membrane	0	1
938	42.35.03	prokaryotic vesicular intracytoplasmic membrane	0	1
939	42.35.05	prokaryotic tubular intracytoplasmic membrane	0	1
940	42.35.07	prokaryotic thylakoid-like and thylakoid membrane	0	1
941	42.36	prokaryotic cell inclusions	0	1
942	42.37	prokaryotic nucleoid	0	1
943	43	CELL TYPE DIFFERENTIATION	10	0.461453	NCU01369 NCU01422 NCU03257 NCU03659 NCU05435 NCU06331 NCU07221 NCU09559 NCU09602 NCU09686
944	43.01	fungal/microorganismic cell type differentiation	7	0.80129	NCU03257 NCU03659 NCU05435 NCU06331 NCU07221 NCU09559 NCU09686
945	43.01.02	prokaryotic cell type differentiation	0	1
946	43.01.02.01	development free living cell or mycelium	0	1
947	43.01.02.02	development of sporangia and cystophore	0	1
948	43.01.02.03	development of heterocyste	0	1
949	43.01.02.05	sporulation and other development of resting stage	0	1
950	43.01.02.05.01	development of endospore	0	1
951	43.01.02.05.03	development of exospore, cyst, akinete or other resting cell	0	1
952	43.01.02.07	germination from resting stage	0	1
953	43.01.02.09	development of stalked or other sessile cell	0	1
954	43.01.02.11	development of swarmer or other mobile cell	0	1
955	43.01.03	fungal and other eukaryotic cell type differentiation	7	0.80129	NCU03257 NCU03659 NCU05435 NCU06331 NCU07221 NCU09559 NCU09686
956	43.01.03.01	development of free swimming or amoeboid cell	0	1
957	43.01.03.02	development of mycelial or yeast-like cell	0	1
958	43.01.03.03	development of thallic, plasmodial or sporangiophore cell	0	1
959	43.01.03.05	budding, cell polarity and filament formation	2	0.962052	NCU03257 NCU03659
960	43.01.03.06	hyphae formation	0	1
961	43.01.03.07	development of conidia	1	0.257784	NCU09559
962	43.01.03.09	development of asco- basidio- or zygospore	3	0.621875	NCU06331 NCU07221 NCU09686
963	43.01.06	protist cell differentiation	0	1
964	43.01.07	biofilm formation	0	1
965	43.02	plant cell type differentiation	0	1
966	43.02.01	stem cell/meristematic cell	0	1
967	43.02.05	epidermal cell	0	1
968	43.02.05.01	stomata/guard cell	0	1
969	43.02.05.02	plant hair cell (trichome egcotton)	0	1
970	43.02.05.03	root hair	0	1
971	43.02.07	storage cell	0	1
972	43.02.09	vascular cell	0	1
973	43.02.09.01	sieve cell (phloem)	0	1
974	43.02.09.02	companion cell (phloem)	0	1
975	43.02.09.03	vessel element (xylem)	0	1
976	43.02.11	mesenchymal / parenchymal cell	0	1
977	43.02.13	strengthening cell	0	1
978	43.02.13.01	sclerenchyma cell(dead)	0	1
979	43.02.13.02	collenchyma cell (living)	0	1
980	43.02.17	gametophytic cell	0	1
981	43.02.17.01	male gametophyte	0	1
982	43.02.17.01.01	generative pollen cell	0	1
983	43.02.17.02	female gametophyte	0	1
984	43.02.17.02.01	oocyte	0	1
985	43.02.17.02.03	central cell (n)	0	1
986	43.02.19	secretory cell	0	1
987	43.03	animal cell type differentiation	3	0.0190509	NCU01369 NCU01422 NCU09602
988	43.03.01	stem cell (toti- or pluripotent)	0	1
989	43.03.02	germ cell	0	1
990	43.03.03	pigment cell	0	1
991	43.03.04	epidermal cell (egkeratinocytes)	0	1
992	43.03.05	myoblast	0	1
993	43.03.07	blood cell	0	1
994	43.03.07.01	erythrocyte	0	1
995	43.03.07.02	leucocyte	0	1
996	43.03.07.02.01	lymphocyte	0	1
997	43.03.07.02.01.01	B-cell	0	1
998	43.03.07.02.01.02	T-cell	0	1
999	43.03.07.02.01.03	NK cell	0	1
1000	43.03.07.02.02	granulocyte	0	1
1001	43.03.07.02.03	monocyte (macrophage, dendritic cell)	0	1
1002	43.03.07.03	platelet	0	1
1003	43.03.11	glia cell	0	1
1004	43.03.13	neuron	0	1
1005	43.03.15	secretory cell (mastcell, endocrine cell, etc)	0	1
1006	43.03.17	structural cell of tissue (fibroblast, osteoblast, etc)	0	1
1007	43.03.18	storage cell (lipocyte, etc)	0	1
1008	43.03.19	extracellular matrix forming cell (fibrocyte, chondrocyte, osteocyte)	0	1
1009	43.03.21	extracellular matrix degrading cell (chondroclast, osteoclast)	0	1
1010	43.03.23	sensory cell	0	1
1011	45	TISSUE DIFFERENTIATION	0	1
1012	45.01	fungal/microorganismic tissue	0	1
1013	45.01.01	reproductive tissue	0	1
1014	45.01.10	thallic tissue	0	1
1015	45.01.11	plectenchymatic tissue and tissue of primitive thalli (eghigher fungi)	0	1
1016	45.02	plant tissue	0	1
1017	45.02.01	meristematic tissue	0	1
1018	45.02.01.01	shoot apical meristem	0	1
1019	45.02.01.02	root meristem	0	1
1020	45.02.05	parenchyma	0	1
1021	45.02.09	dermal tissue	0	1
1022	45.02.09.01	epidermis	0	1
1023	45.02.09.03	rhizodermis	0	1
1024	45.02.09.05	secondary dermal tissue (cork, phellem)	0	1
1025	45.02.09.07	endodermis (with casparian band)	0	1
1026	45.02.13	vascular tissue	0	1
1027	45.02.15	thallus	0	1
1028	45.03	animal tissue	0	1
1029	45.03.03	proliferative tissue (bone marrow, epidermis, etc)	0	1
1030	45.03.05	connective tissue	0	1
1031	45.03.05.01	loose connective tissue / soft tissue	0	1
1032	45.03.05.03	fibrous connective tissue (tendons, ligaments)	0	1
1033	45.03.05.05	cartilage	0	1
1034	45.03.05.07	bone	0	1
1035	45.03.05.09	whole blood and lymph	0	1
1036	45.03.05.11	adipose tissue	0	1
1037	45.03.09	epithelium	0	1
1038	45.03.10	chorion	0	1
1039	45.03.11	endothelium	0	1
1040	45.03.12	muscle	0	1
1041	45.03.12.01	striated muscle	0	1
1042	45.03.12.02	smooth muscle	0	1
1043	45.03.12.03	heart muscle	0	1
1044	45.03.15	reproductive tissue	0	1
1045	45.03.17	nervous tissue	0	1
1046	45.03.19	glandular tissue	0	1
1047	47	ORGAN DIFFERENTIATION	0	1
1048	47.01	fungal organ	0	1
1049	47.01.01	hyphe	0	1
1050	47.01.03	reproductive organ	0	1
1051	47.01.03.01	fruit body	0	1
1052	47.02	plant organ	0	1
1053	47.02.01	shoot	0	1
1054	47.02.01.01	stem	0	1
1055	47.02.01.02	leaf	0	1
1056	47.02.01.03	flower	0	1
1057	47.02.01.03.01	sepal	0	1
1058	47.02.01.03.02	petal	0	1
1059	47.02.01.03.03	anther	0	1
1060	47.02.01.03.04	carpel	0	1
1061	47.02.01.04	fruit	0	1
1062	47.02.01.05	seed	0	1
1063	47.02.01.05.01	embryo	0	1
1064	47.02.01.05.02	endosperm	0	1
1065	47.02.01.06	rhizome (potato tuber/onion)	0	1
1066	47.02.02	root	0	1
1067	47.03	animal organ	0	1
1068	47.03.01	nervous system	0	1
1069	47.03.01.01	central nervous system	0	1
1070	47.03.01.01.01	brain	0	1
1071	47.03.01.01.01.01	cerebrum	0	1
1072	47.03.01.01.01.02	cerebellum	0	1
1073	47.03.01.02	peripheral nervous system	0	1
1074	47.03.02	sensory organs	0	1
1075	47.03.02.01	ear	0	1
1076	47.03.02.02	eye	0	1
1077	47.03.02.03	nose	0	1
1078	47.03.02.04	tongue	0	1
1079	47.03.02.05	skin	0	1
1080	47.03.03	vascular organs	0	1
1081	47.03.03.02	vessels	0	1
1082	47.03.05	immune system organs	0	1
1083	47.03.05.01	thymus	0	1
1084	47.03.05.02	spleen	0	1
1085	47.03.05.03	lymphatic system	0	1
1086	47.03.07	excretory apparatus	0	1
1087	47.03.07.01	kidney	0	1
1088	47.03.07.03	malphigi	0	1
1089	47.03.07.05	pronephros (sensu Invertebrata)	0	1
1090	47.03.07.07	metanephros (sensu Invertebrata)	0	1
1091	47.03.09	respiratory system	0	1
1092	47.03.09.01	lung	0	1
1093	47.03.09.03	gill	0	1
1094	47.03.09.05	trachea (sensu Insecta)	0	1
1095	47.03.11	gastro-intestinal system	0	1
1096	47.03.11.01	tooth	0	1
1097	47.03.11.02	oesophagus	0	1
1098	47.03.11.03	stomach	0	1
1099	47.03.11.05	intestine	0	1
1100	47.03.11.07	liver	0	1
1101	47.03.11.09	pancreas	0	1
1102	47.03.11.11	gastro-intestinal system accessory organs	0	1
1103	47.03.13	dermis/cuticula	0	1
1104	47.03.13.05	hair / feather follicule	0	1
1105	47.03.15	reproductive apparatus	0	1
1106	47.03.15.01	female gonad (ovary)	0	1
1107	47.03.15.02	oviduct	0	1
1108	47.03.15.04	uterus	0	1
1109	47.03.15.04.03	cervix	0	1
1110	47.03.15.05	placenta	0	1
1111	47.03.15.07	male gonad (testis)	0	1
1112	47.03.17	skeletal system	0	1
1113	47.03.21	secretory organs (glands)	0	1
1114	47.03.21.01	mammary gland	0	1
1115	47.03.21.02	salivary gland	0	1
1116	47.03.21.03	endocrine organ	0	1
1117	47.03.21.03.01	adrenal gland	0	1
1118	47.03.21.03.02	pancreatic islet	0	1
1119	47.03.21.03.03	parathyroid	0	1
1120	47.03.21.03.04	pineal gland	0	1
1121	47.03.21.03.05	pituitary gland	0	1
1122	47.03.21.03.06	thyroid gland	0	1
1123	47.03.21.03.07	hypothalamus	0	1
1124	47.03.21.04	prostate gland	0	1
1125	47.03.21.05	sweat (perspiratory) gland	0	1
1126	70	SUBCELLULAR LOCALIZATION	0	1
1127	70.01	cell wall	0	1
1128	70.02	eukaryotic plasma membrane / membrane attached	0	1
1129	70.02.01	eukaryotic intracellular plasma membrane	0	1
1130	70.03	cytoplasm	0	1
1131	70.04	cytoskeleton	0	1
1132	70.04.03	actin cytoskeleton	0	1
1133	70.04.05	microtubule cytoskeleton	0	1
1134	70.04.07	intermediate filaments	0	1
1135	70.05	centrosome	0	1
1136	70.06	cell junction	0	1
1137	70.06.03	cell-substrate adherens junction	0	1
1138	70.06.04	intercellular junction (gap junction/adherens junction)	0	1
1139	70.07	endoplasmic reticulum	0	1
1140	70.08	Golgi	0	1
1141	70.09	intracellular transport vesicles	0	1
1142	70.1	nucleus	0	1
1143	70.10.03	chromosome	0	1
1144	70.10.04	centromere / kinetochore	0	1
1145	70.10.05	nuclear membrane	0	1
1146	70.10.06	nuclear matrix	0	1
1147	70.10.07	nucleolus	0	1
1148	70.10.09	nuclear speckles	0	1
1149	70.16	mitochondrion	0	1
1150	70.16.01	mitochondrial outer membrane	0	1
1151	70.16.03	mitochondrial intermembrane space	0	1
1152	70.16.05	mitochondrial inner membrane	0	1
1153	70.16.07	mitochondrial matrix	0	1
1154	70.19	peroxisome	0	1
1155	70.22	endosome	0	1
1156	70.25	vacuole or lysosome	0	1
1157	70.26	plastid	0	1
1158	70.26.03	chloroplast	0	1
1159	70.26.05	amyloplast	0	1
1160	70.26.07	chromoplast	0	1
1161	70.26.09	elaioplast	0	1
1162	70.26.11	etioplast	0	1
1163	70.26.13	leucoplast	0	1
1164	70.27	extracellular / secretion proteins	0	1
1165	70.27.01	extracellular matrix component	0	1
1166	70.27.03	cell membrane or cell wall attached	0	1
1167	70.28	periplasmatic space	0	1
1168	70.29	bud / growth tip	0	1
1169	70.3	prokaryotic cytoplasmic membrane	0	1
1170	70.32	flagellum	0	1
1171	70.33	pilus/fimbria	0	1
1172	70.34	prokaryotic cell envelope component	0	1
1173	70.34.01	bacterial outer membrane (only present in Gram- bacteria)	0	1
1174	70.34.03	capsule and slime layer	0	1
1175	70.34.05	S-Layer	0	1
1176	70.34.07	peptidoglycan layer or other prokaryotic cell wall	0	1
1177	70.34.09	spore or cyst coat	0	1
1178	70.35	prokaryotic intracytoplasmic membrane	0	1
1179	70.35.03	prokaryotic vesicular intracytoplasmic membrane	0	1
1180	70.35.05	prokaryotic tubular intracytoplasmic membrane	0	1
1181	70.35.07	prokaryotic thylakoid-like and thylakoid membrane	0	1
1182	70.36	prokaryotic cell inclusions	0	1
1183	70.36.03	carboxysomes	0	1
1184	70.36.05	gas vesicles	0	1
1185	70.36.07	sulfur globules or magnetosomes	0	1
1186	70.36.09	bacteriocins, rhapidosomes and protein crystals	0	1
1187	70.37	prokaryotic nucleoid	0	1
1188	73	CELL TYPE LOCALIZATION	0	1
1189	73.01	fungal / microorganismic cell type	0	1
1190	73.01.02	prokaryotic cell type	0	1
1191	73.01.02.01	free living cell or mycelium	0	1
1192	73.01.02.02	sporangial or cystophor cell	0	1
1193	73.01.02.03	heterocyste	0	1
1194	73.01.02.05	spores and other resting cell types	0	1
1195	73.01.02.05.01	endospore	0	1
1196	73.01.02.05.03	exospore, cyst, akinete or other resting cells	0	1
1197	73.01.02.11	swarmer and other mobile cells	0	1
1198	73.01.03	fungal and other eukaryotic cell types	0	1
1199	73.01.03.01	free swimming or amoeboid cell	0	1
1200	73.01.03.02	mycelial or yeast-like cell	0	1
1201	73.01.03.03	thallic, plasmodial or sporangiophore cell	0	1
1202	73.01.03.07	conidia	0	1
1203	73.01.03.09	asco- basidio- or zygospore	0	1
1204	73.02	plant cell type	0	1
1205	73.02.01	stem cell/meristematic cell	0	1
1206	73.02.05	specialized epidermal cell	0	1
1207	73.02.05.01	stomata/guard cell	0	1
1208	73.02.05.02	plant hair cell (trichome egcotton)	0	1
1209	73.02.05.03	root hair	0	1
1210	73.02.07	storage cell	0	1
1211	73.02.09	vascular cell	0	1
1212	73.02.09.01	sieve cell (phloem)	0	1
1213	73.02.09.02	companion cell (phloem)	0	1
1214	73.02.09.03	vessel element (xylem)	0	1
1215	73.02.13	strengthening cell	0	1
1216	73.02.13.01	sclerenchyma cell(dead)	0	1
1217	73.02.13.02	collenchyma cell (living)	0	1
1218	73.02.17	gametophytic cell	0	1
1219	73.02.17.01	male gametophyte	0	1
1220	73.02.17.01.01	generative pollen cell	0	1
1221	73.02.17.02	female gametophyte	0	1
1222	73.02.17.02.01	oocyte	0	1
1223	73.02.17.02.03	central cell (n)	0	1
1224	73.02.19	secretory cell	0	1
1225	73.03	animal cell type	0	1
1226	73.03.01	stem cell (toti- or pluripotent)	0	1
1227	73.03.02	germ cell	0	1
1228	73.03.03	pigment cell	0	1
1229	73.03.07	blood cell	0	1
1230	73.03.07.01	erythrocyte	0	1
1231	73.03.07.02	leucocyte	0	1
1232	73.03.07.02.01	lymphocyte	0	1
1233	73.03.07.02.01.01	B-cell	0	1
1234	73.03.07.02.01.02	T-cell	0	1
1235	73.03.07.02.01.03	NK cell	0	1
1236	73.03.07.02.02	granulocyte	0	1
1237	73.03.07.02.03	monocyte (macrophage, dendritic cell)	0	1
1238	73.03.07.03	platelet	0	1
1239	73.03.11	glia cell	0	1
1240	73.03.13	neuron	0	1
1241	73.03.15	secretory cell (mastcell, endocrine cell, etc)	0	1
1242	73.03.17	structural cell of tissue (fibroblast, osteoblast, etc)	0	1
1243	73.03.18	storage cell (lipocyte, etc)	0	1
1244	73.03.19	extracellular matrix forming cell (fibrocyte, chondrocyte, osteocyte)	0	1
1245	73.03.21	extracellular matrix degrading cell (chondroclast, osteoclast)	0	1
1246	73.03.23	sensory cell	0	1
1247	75	TISSUE LOCALIZATION	0	1
1248	75.01	fungal/microorganismic tissue	0	1
1249	75.01.01	reproductive tissue	0	1
1250	75.01.10	thallic tissue	0	1
1251	75.01.11	plectenchymatic tissue and tissue of primitive thalli (eghigher fungi)	0	1
1252	75.02	plant tissue	0	1
1253	75.02.01	meristematic tissue	0	1
1254	75.02.01.01	shoot apical meristem	0	1
1255	75.02.01.02	root meristem	0	1
1256	75.02.05	parenchyma	0	1
1257	75.02.09	dermal tissue	0	1
1258	75.02.09.01	epidermis	0	1
1259	75.02.09.03	rhizodermis	0	1
1260	75.02.09.05	secondary dermal tissue (cork, phellem)	0	1
1261	75.02.09.07	endodermis (with casparian band)	0	1
1262	75.02.13	vascular tissue	0	1
1263	75.02.15	thallus	0	1
1264	75.03	animal tissue	0	1
1265	75.03.03	proliferative tissue	0	1
1266	75.03.03.01	bone marrow	0	1
1267	75.03.04	adipose tissue	0	1
1268	75.03.05	connective tissue	0	1
1269	75.03.05.01	loose connective tissue / soft tissue	0	1
1270	75.03.05.03	fibrous connective tissue (tendons, ligaments)	0	1
1271	75.03.06	cartilage	0	1
1272	75.03.07	bone	0	1
1273	75.03.08	whole blood and lymph	0	1
1274	75.03.09	epithelium	0	1
1275	75.03.12	muscle	0	1
1276	75.03.12.01	striated muscle	0	1
1277	75.03.12.02	smooth muscle	0	1
1278	75.03.12.03	heart muscle	0	1
1279	75.03.15	reproductive tissue	0	1
1280	75.03.17	nervous tissue	0	1
1281	75.03.19	glandular tissue	0	1
1282	77	ORGAN LOCALIZATION	0	1
1283	77.01	fungal organ	0	1
1284	77.01.01	hyphe	0	1
1285	77.01.03	reproductive organ	0	1
1286	77.01.03.01	fruit body	0	1
1287	77.02	plant organ	0	1
1288	77.02.01	shoot	0	1
1289	77.02.01.01	stem	0	1
1290	77.02.01.02	leaf	0	1
1291	77.02.01.03	flower	0	1
1292	77.02.01.03.01	sepal	0	1
1293	77.02.01.03.02	petal	0	1
1294	77.02.01.03.03	anther	0	1
1295	77.02.01.03.04	carpel	0	1
1296	77.02.01.04	fruit	0	1
1297	77.02.01.05	seed	0	1
1298	77.02.01.05.01	embryo	0	1
1299	77.02.01.05.02	endosperm	0	1
1300	77.02.01.06	rhizome (potato tuber/onion)	0	1
1301	77.02.02	root	0	1
1302	77.03	animal organ	0	1
1303	77.03.01	nervous system	0	1
1304	77.03.01.01	central nervous system	0	1
1305	77.03.01.01.01	brain	0	1
1306	77.03.01.01.01.01	cerebrum	0	1
1307	77.03.01.01.01.02	cerebellum	0	1
1308	77.03.01.02	peripheral nervous system	0	1
1309	77.03.02	sensory organs	0	1
1310	77.03.02.01	ear	0	1
1311	77.03.02.02	eye	0	1
1312	77.03.02.03	nose	0	1
1313	77.03.02.04	tongue	0	1
1314	77.03.02.05	skin	0	1
1315	77.03.03	vascular organs	0	1
1316	77.03.03.02	vessels	0	1
1317	77.03.05	immune system organs	0	1
1318	77.03.05.01	thymus	0	1
1319	77.03.05.02	spleen	0	1
1320	77.03.05.03	lymphatic system	0	1
1321	77.03.07	excretory apparatus	0	1
1322	77.03.07.01	kidney	0	1
1323	77.03.07.03	malphigi	0	1
1324	77.03.07.05	pronephros (sensu Invertebrata)	0	1
1325	77.03.07.07	metanephros (sensu Invertebrata)	0	1
1326	77.03.09	respiratory system	0	1
1327	77.03.09.01	lung	0	1
1328	77.03.09.03	gill	0	1
1329	77.03.09.05	trachea (sensu Insecta)	0	1
1330	77.03.11	gastro-intestinal system	0	1
1331	77.03.11.01	teeth	0	1
1332	77.03.11.02	oesophagus	0	1
1333	77.03.11.03	stomach	0	1
1334	77.03.11.05	intestine	0	1
1335	77.03.11.07	liver	0	1
1336	77.03.11.09	pancreas	0	1
1337	77.03.11.11	gastro-intestinal system accessory organs	0	1
1338	77.03.13	dermis/cuticula	0	1
1339	77.03.13.05	hair / feather follicule	0	1
1340	77.03.15	reproductive apparatus	0	1
1341	77.03.15.01	female gonad (ovary)	0	1
1342	77.03.15.02	oviduct	0	1
1343	77.03.15.04	uterus	0	1
1344	77.03.15.04.03	cervix	0	1
1345	77.03.15.05	placenta	0	1
1346	77.03.15.07	male gonad (testis)	0	1
1347	77.03.17	skeletal system	0	1
1348	77.03.19	non organ cavities and their linings	0	1
1349	77.03.21	secretory organs (glands)	0	1
1350	77.03.21.01	mammary gland	0	1
1351	77.03.21.02	salivary gland	0	1
1352	77.03.21.03	endocrine organ	0	1
1353	77.03.21.03.01	adrenal gland	0	1
1354	77.03.21.03.02	pancreatic islet	0	1
1355	77.03.21.03.03	parathyroid	0	1
1356	77.03.21.03.04	pineal gland	0	1
1357	77.03.21.03.05	pituitary gland	0	1
1358	77.03.21.03.06	thyroid gland	0	1
1359	77.03.21.04	prostate gland	0	1
1360	77.03.21.05	sweat (perspiratory) gland	0	1
1361	98	CLASSIFICATION NOT YET CLEAR-CUT	0	1
1362	99	UNCLASSIFIED PROTEINS	188	0.999919	NCU00144 NCU00247 NCU00248 NCU00283 NCU00289 NCU00357 NCU00358 NCU00520 NCU00574 NCU00576 NCU00595 NCU00684 NCU00697 NCU00716 NCU00866 NCU00867 NCU00868 NCU00960 NCU00980 NCU01180 NCU01487 NCU01529 NCU01530 NCU01538 NCU01748 NCU01807 NCU01844 NCU01845 NCU01871 NCU01872 NCU01882 NCU01886 NCU01922 NCU01923 NCU01924 NCU01926 NCU02080 NCU02099 NCU02128 NCU02182 NCU02191 NCU02194 NCU02244 NCU02475 NCU…
